# Supplementary material for: Synthesis of benzil-o-carboxylate derivatives and isocoumarins through neighboring ester-participating bromocyclizations of o-alkynylbenzoates
Source: Royal Society of Chemistry journal article supplement (doi:10.1039/c7ob00845g), 2017-01-01

## Supporting Information

# Synthesis of Benzil-*o*-carboxylate Derivatives and Isocoumarins Through Neighboring Ester-Participated Bromocyclization of *o*-Alkynylbenzoates

Si-tian Yuan,<sup>a</sup> Hongwei Zhou,<sup>b\*</sup> Lianpeng Zhang,<sup>b</sup> Jin-biao Liu,<sup>a\*</sup> and Guanyinsheng Qiu<sup>b\*</sup>

<sup>a</sup> School of Metallurgical and Chemical Engineering, Jiangxi University of Science and Technology, 86 Hongqi Road, Ganzhou 341000, China; Email: liujbgood@hotmail.com

<sup>b</sup> College of Biological, Chemical Science and Engineering, Jiaxing University, 118 Jiahang Road, Jiaxing, China. Email: 11110220028@fudan.edu.cn; Phone: +86-573-83642057; Fax: +86-573-83642057

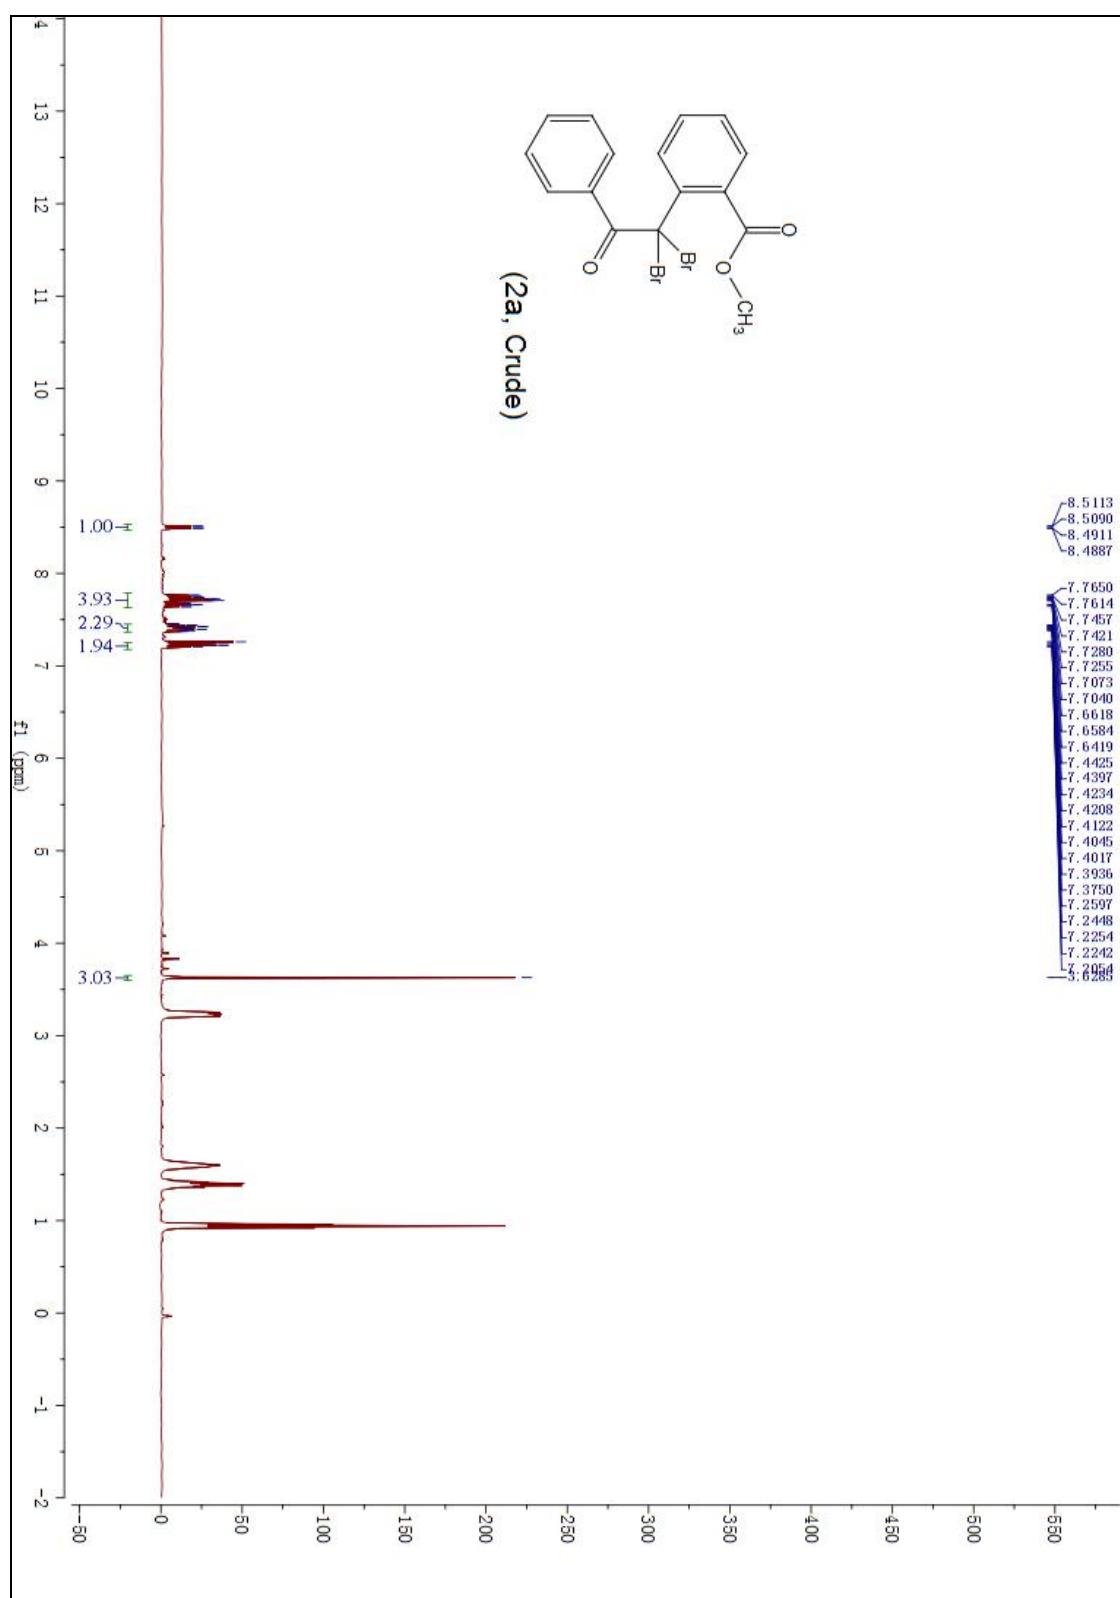

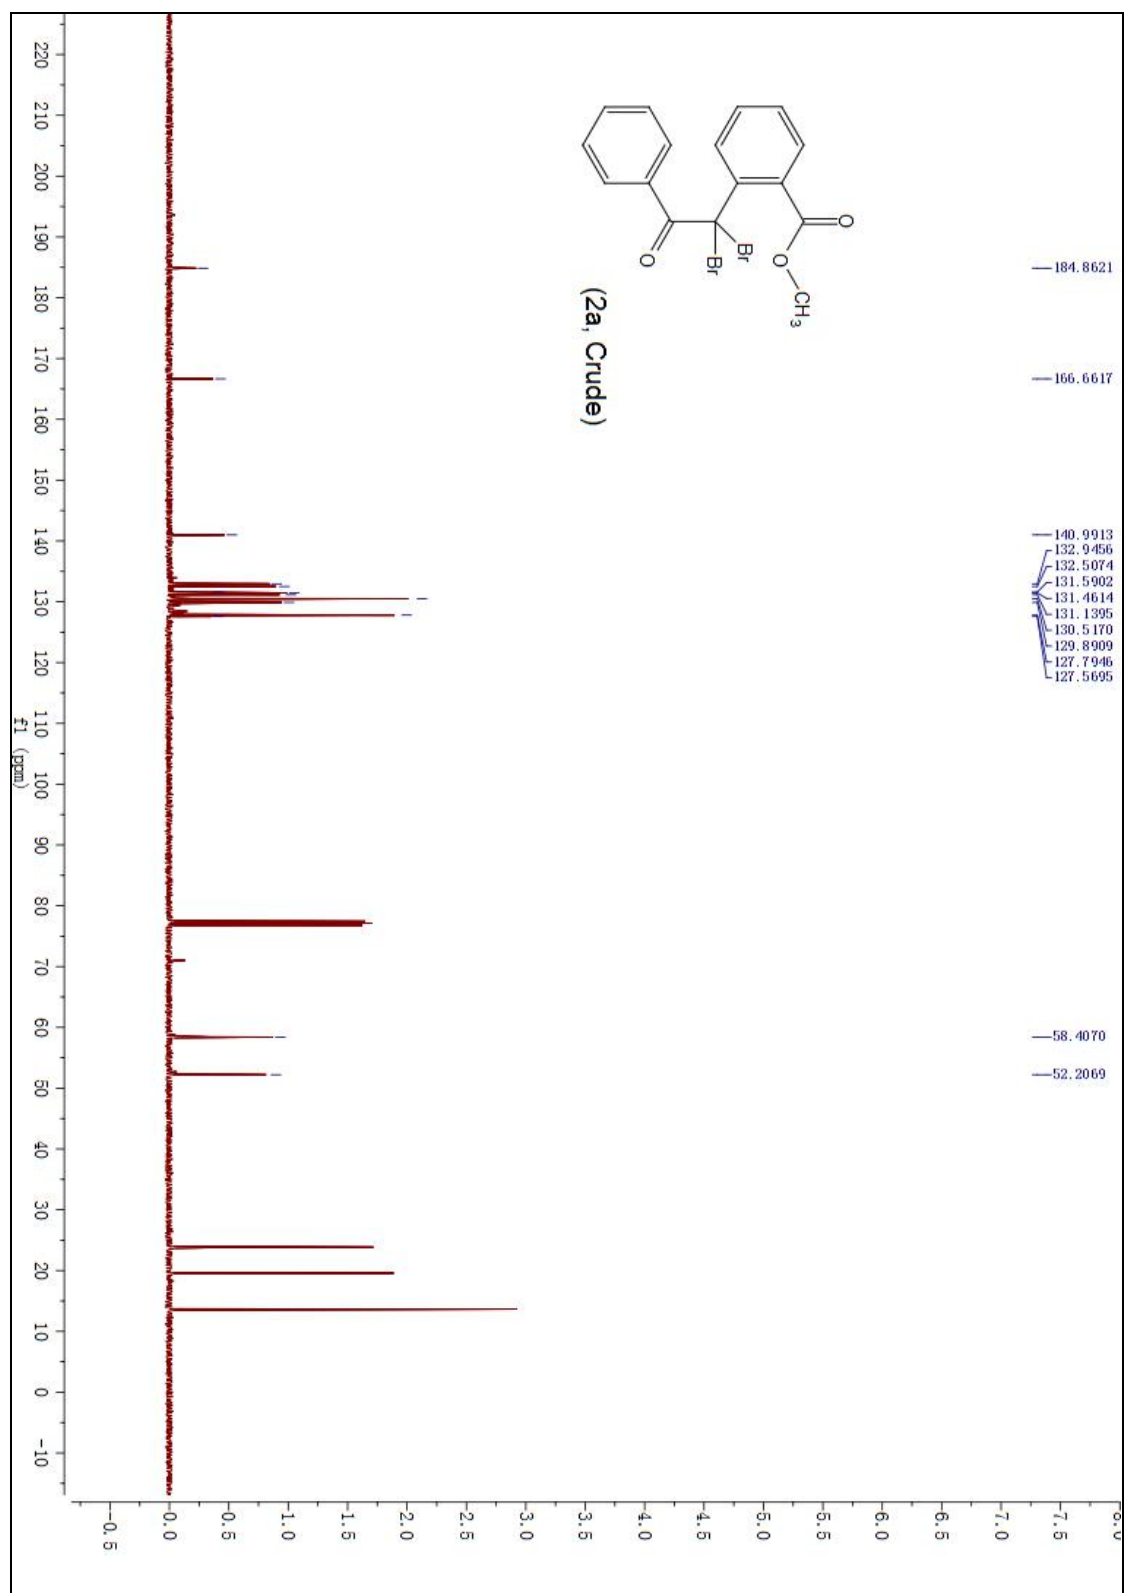

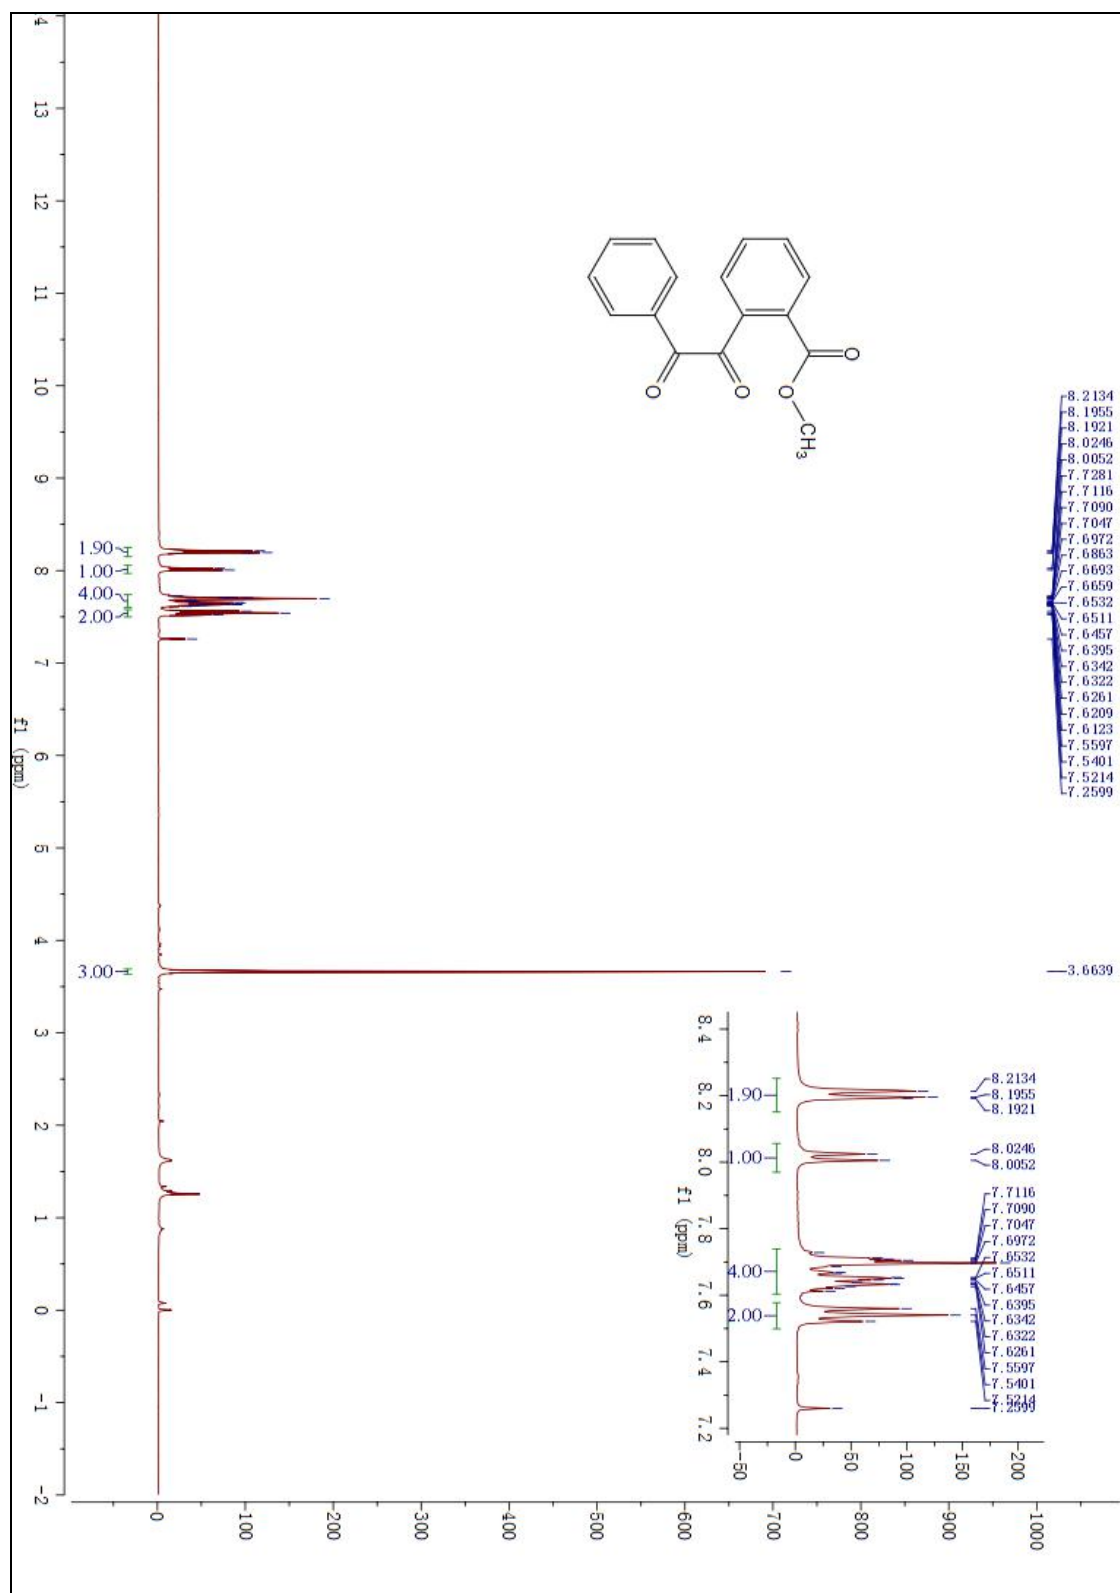

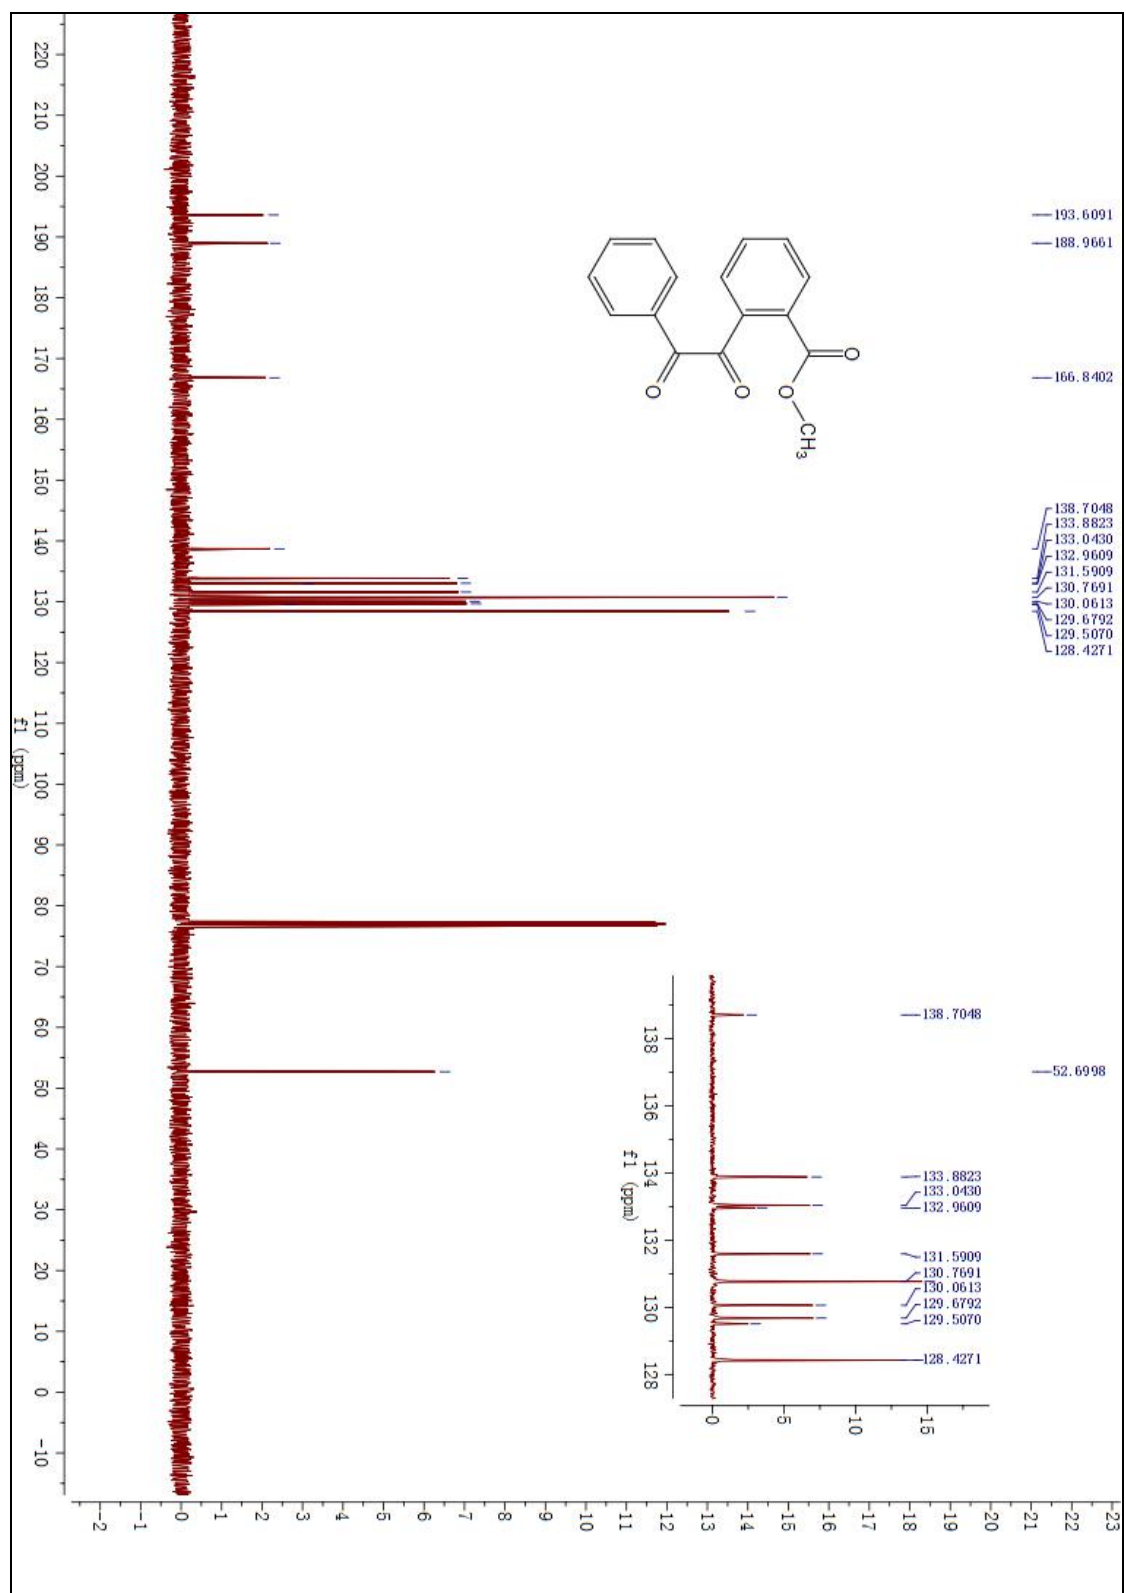

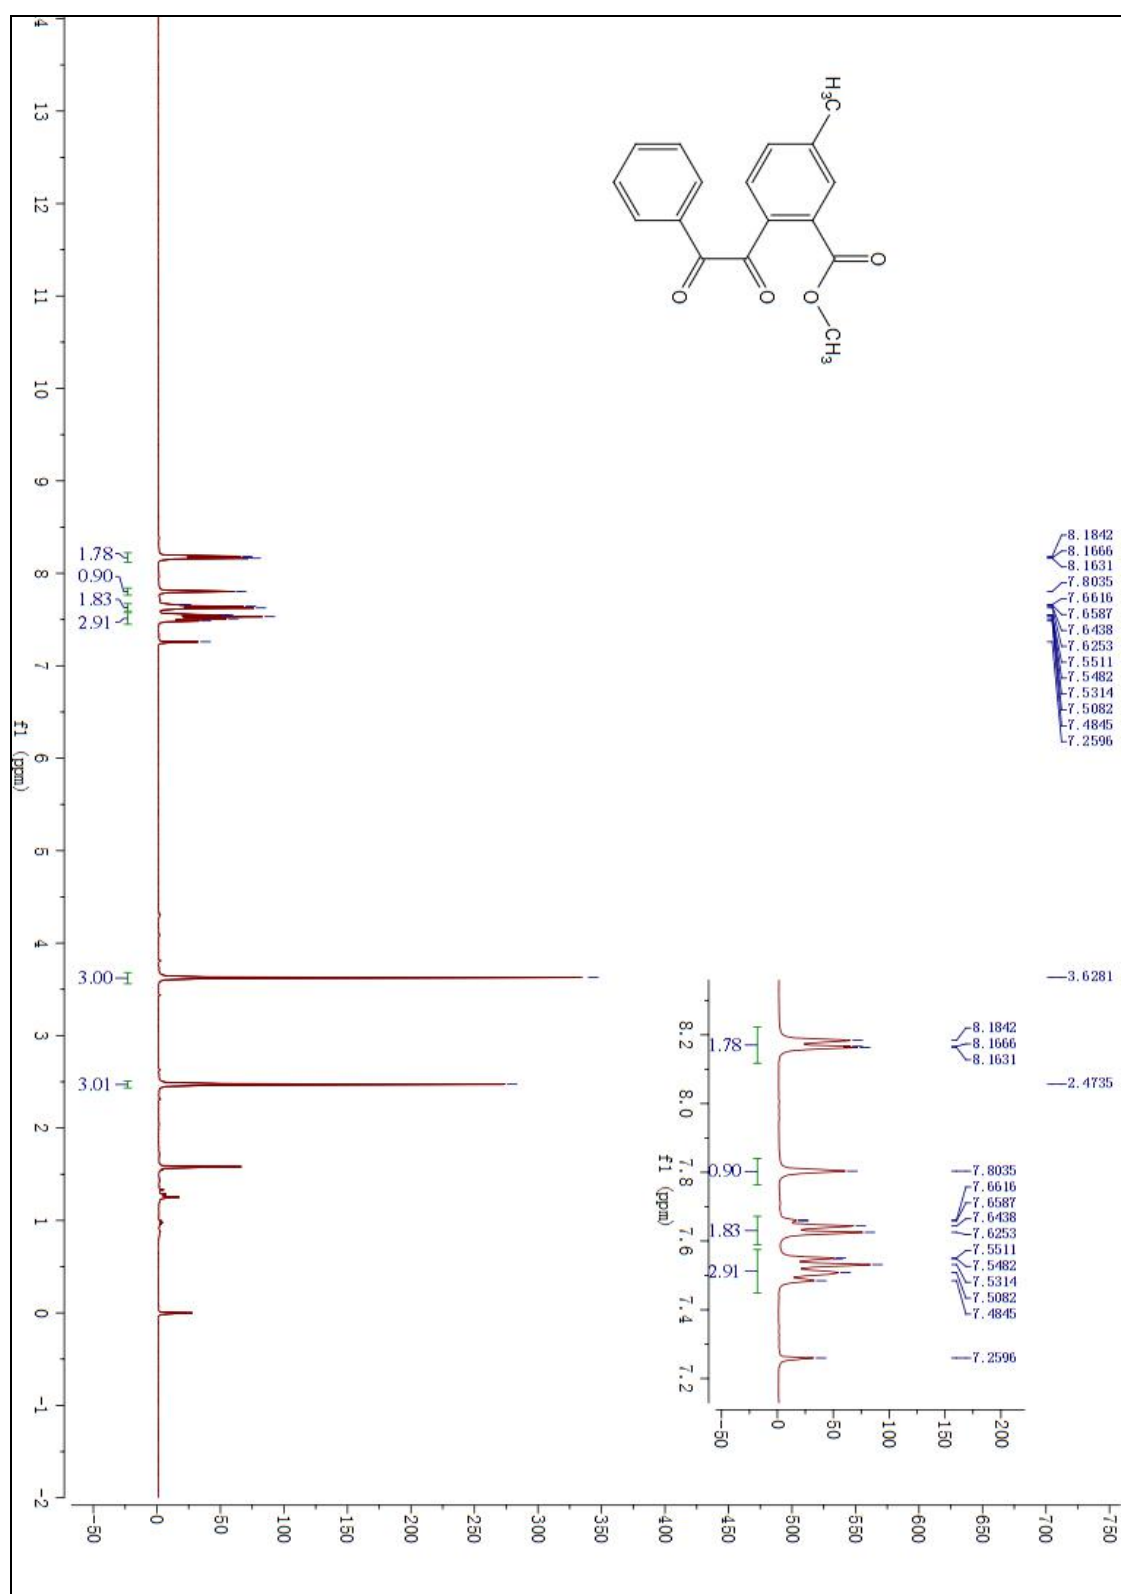

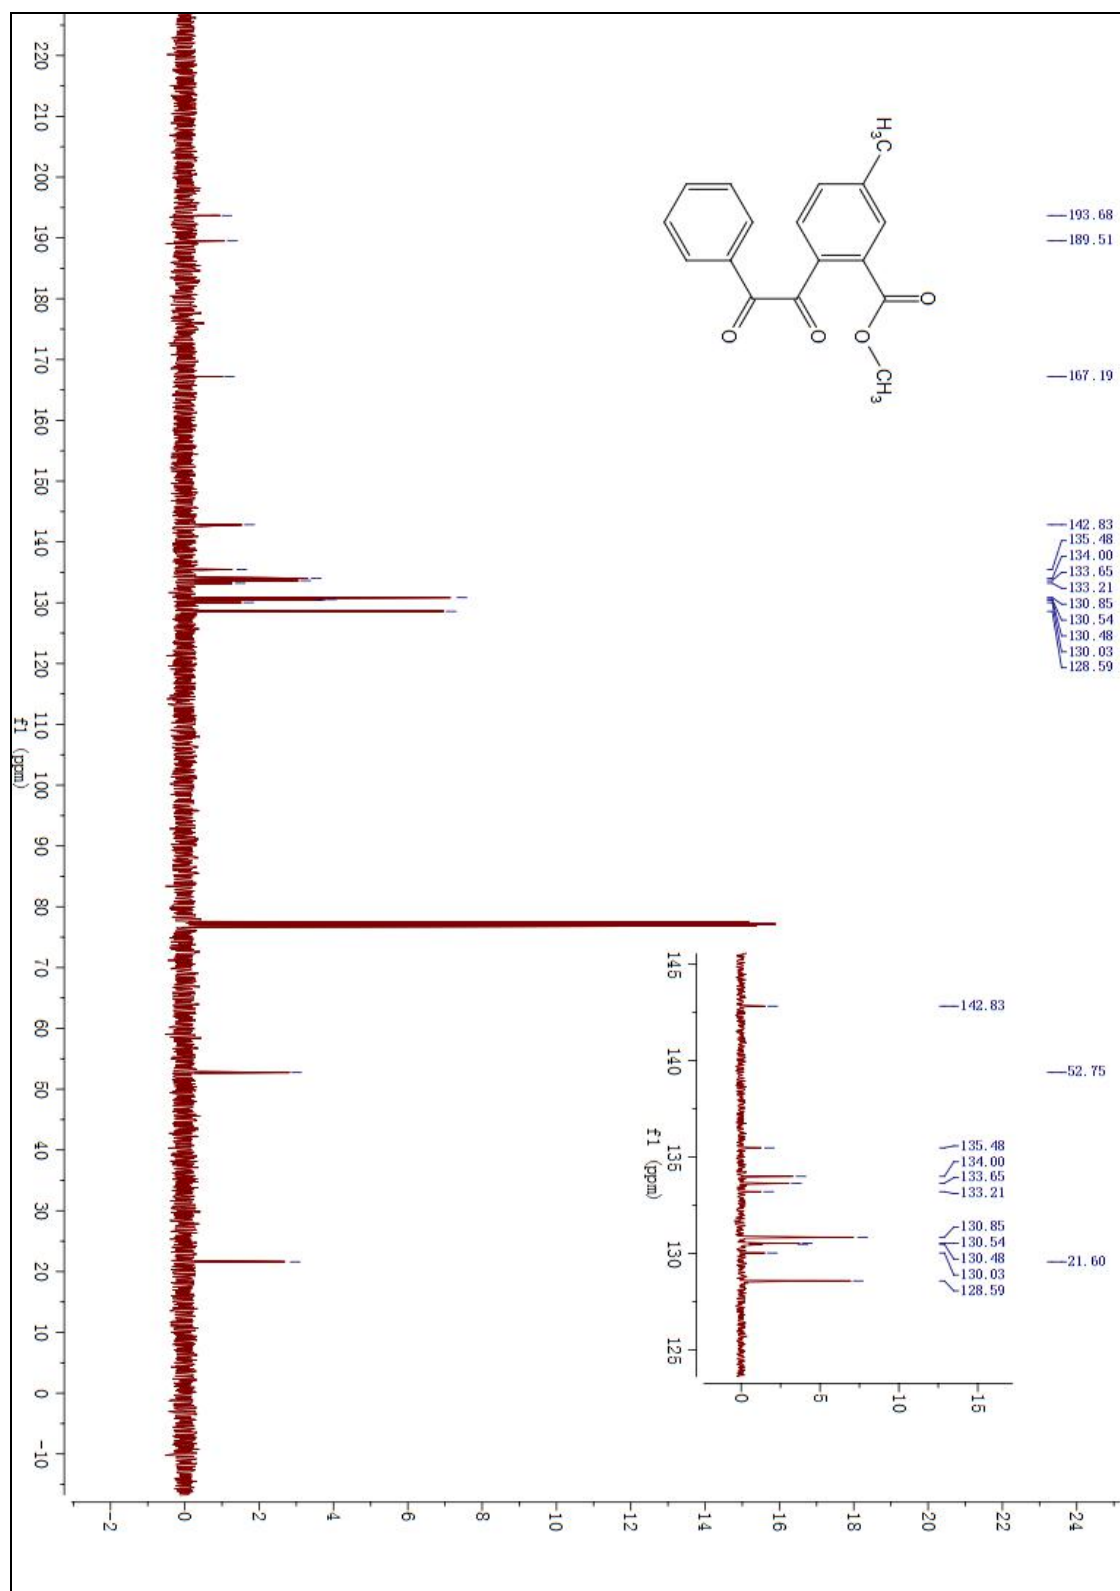

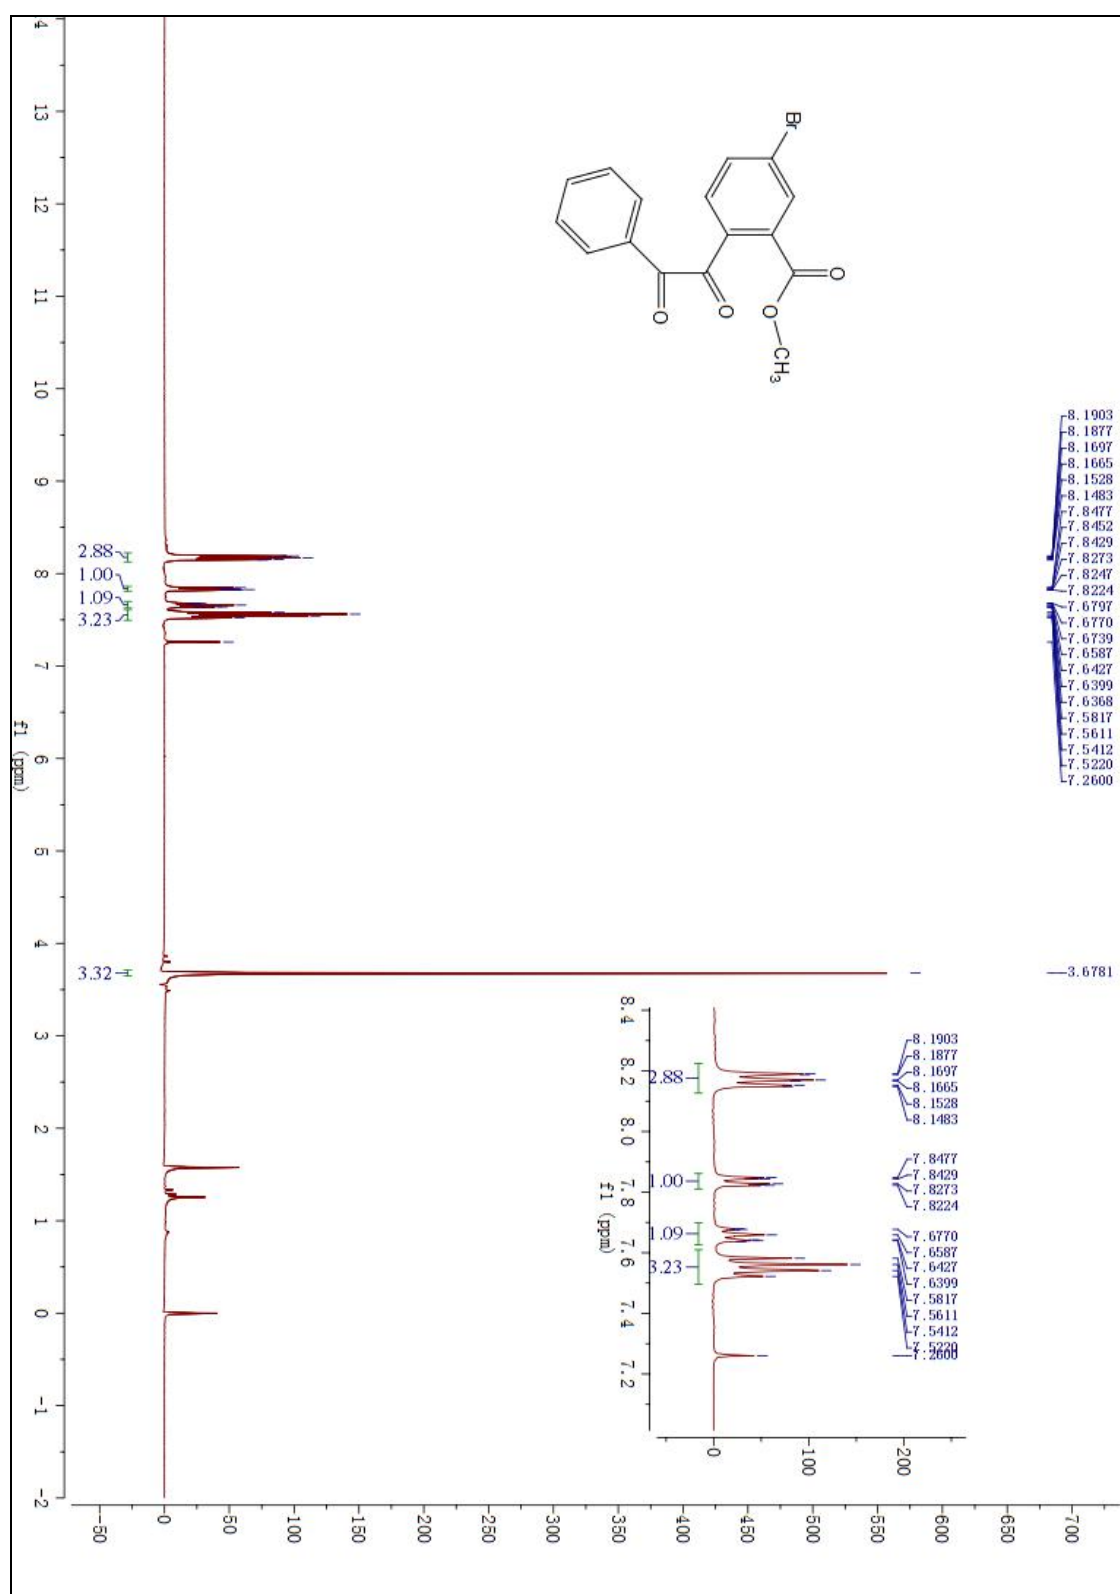



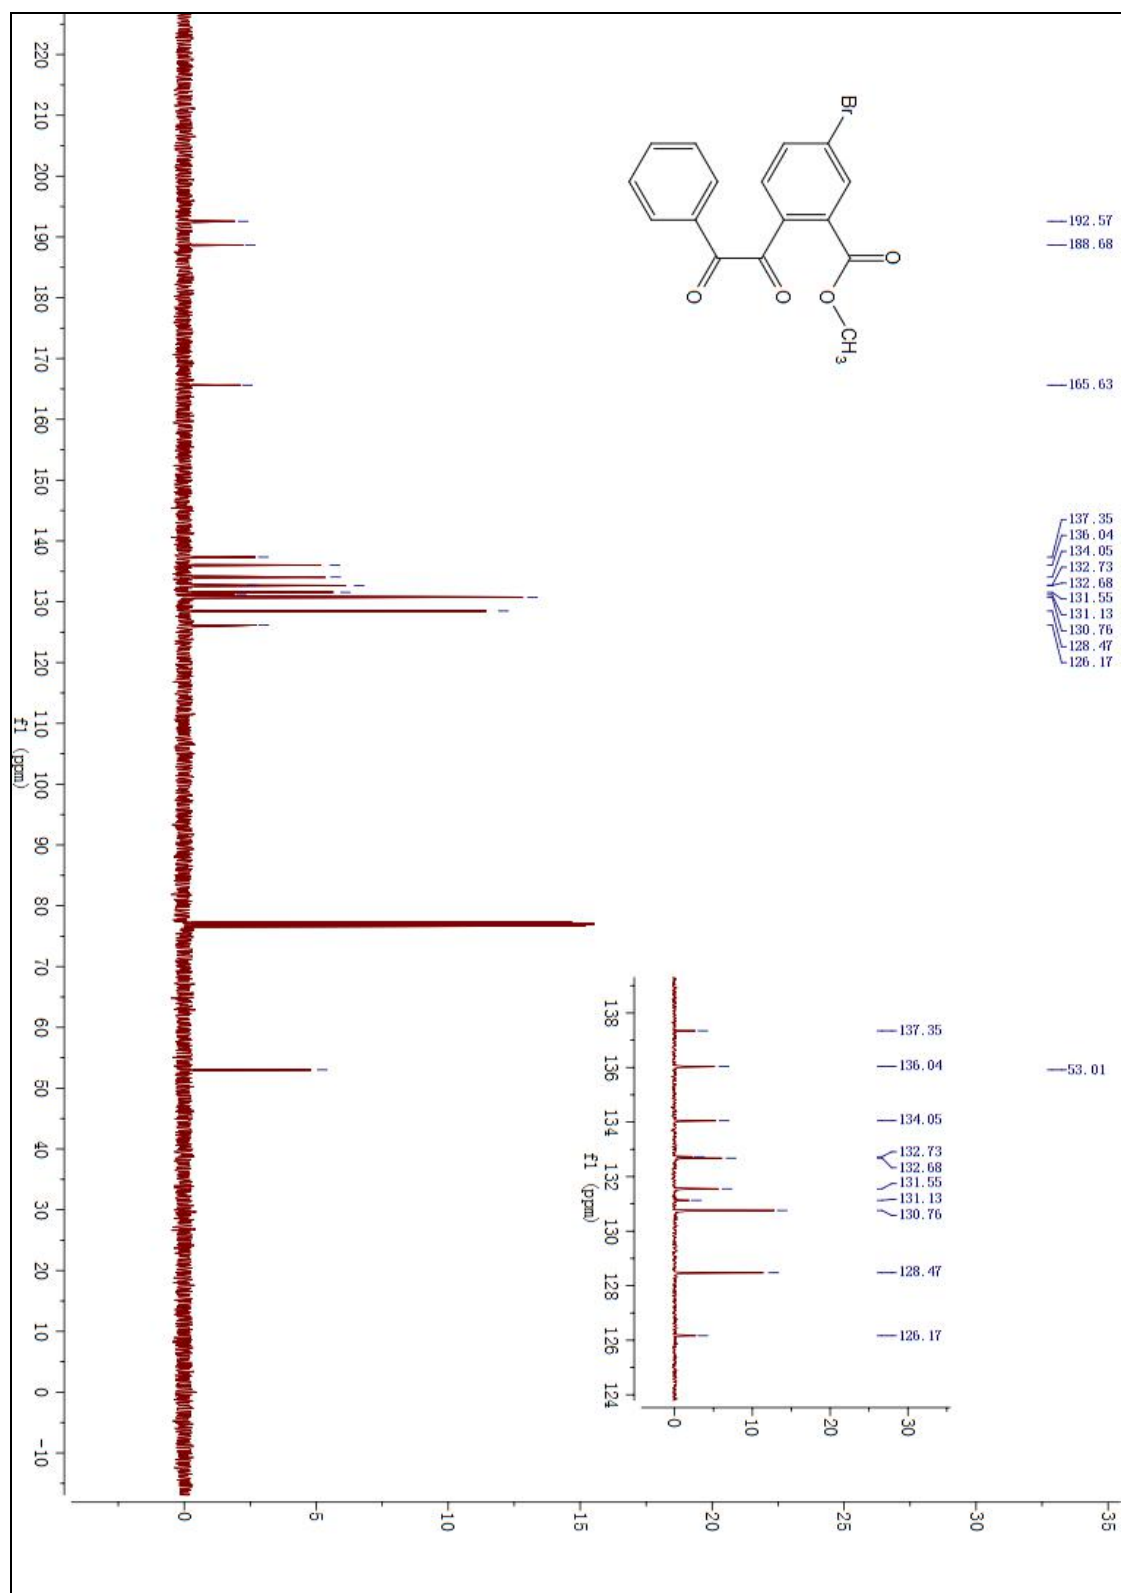

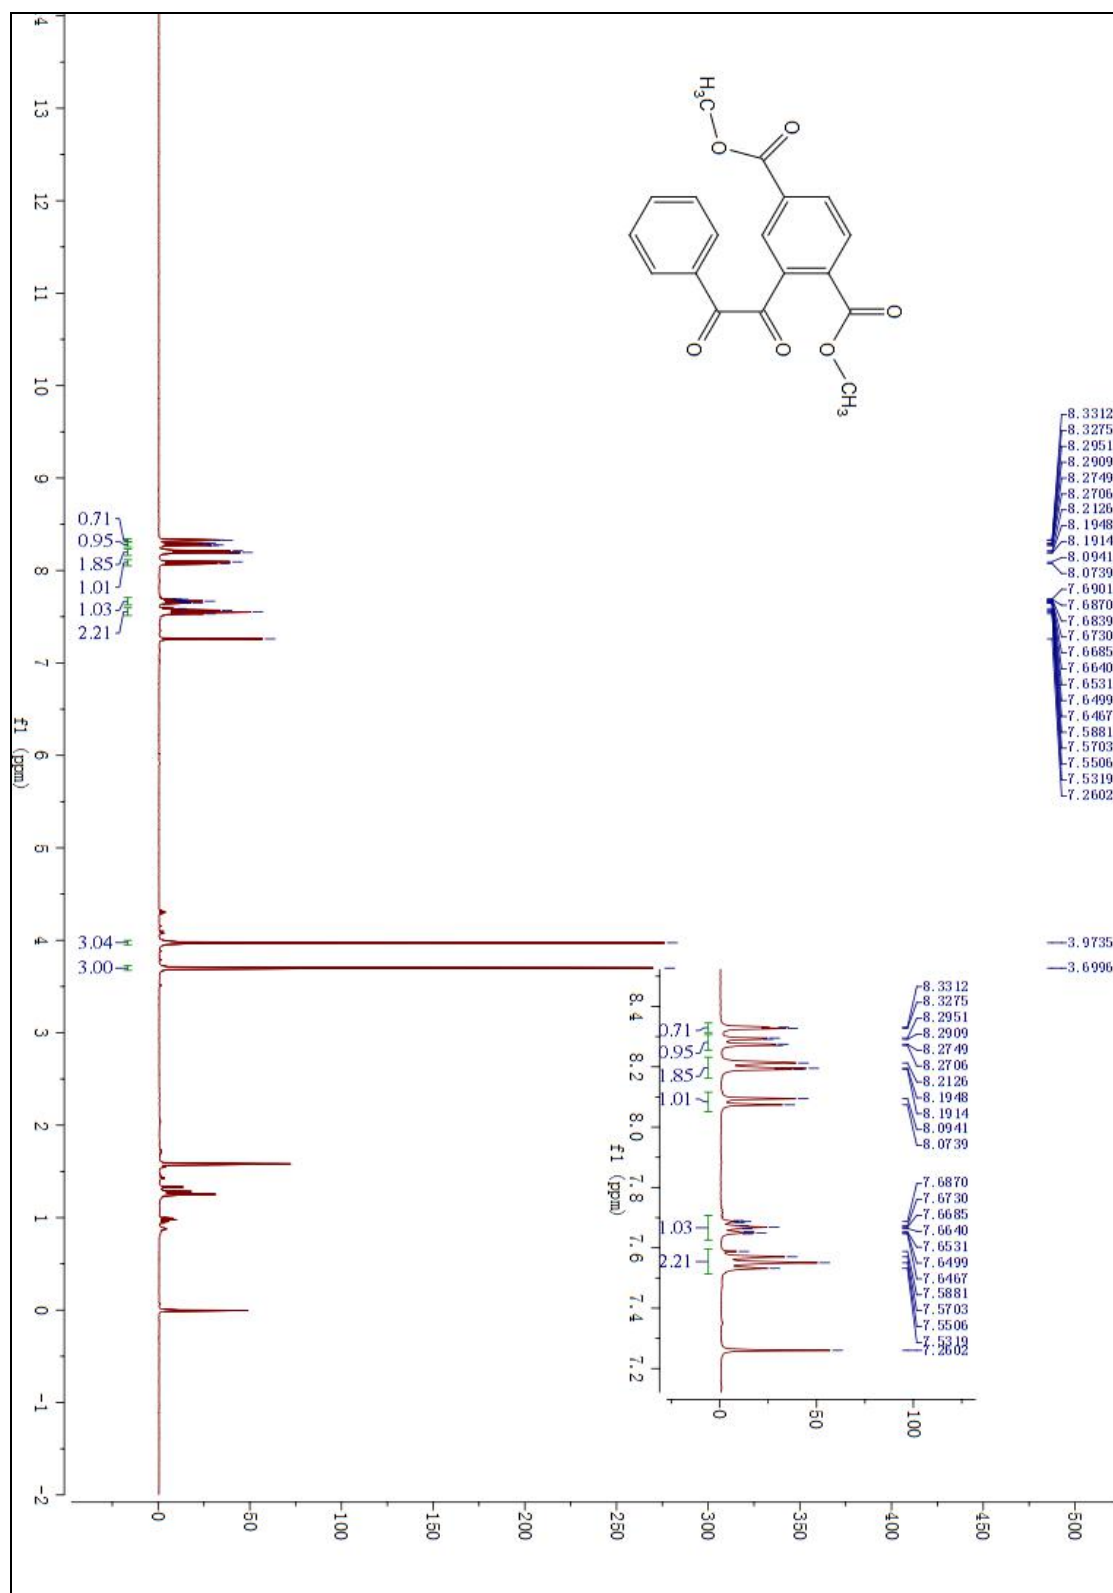

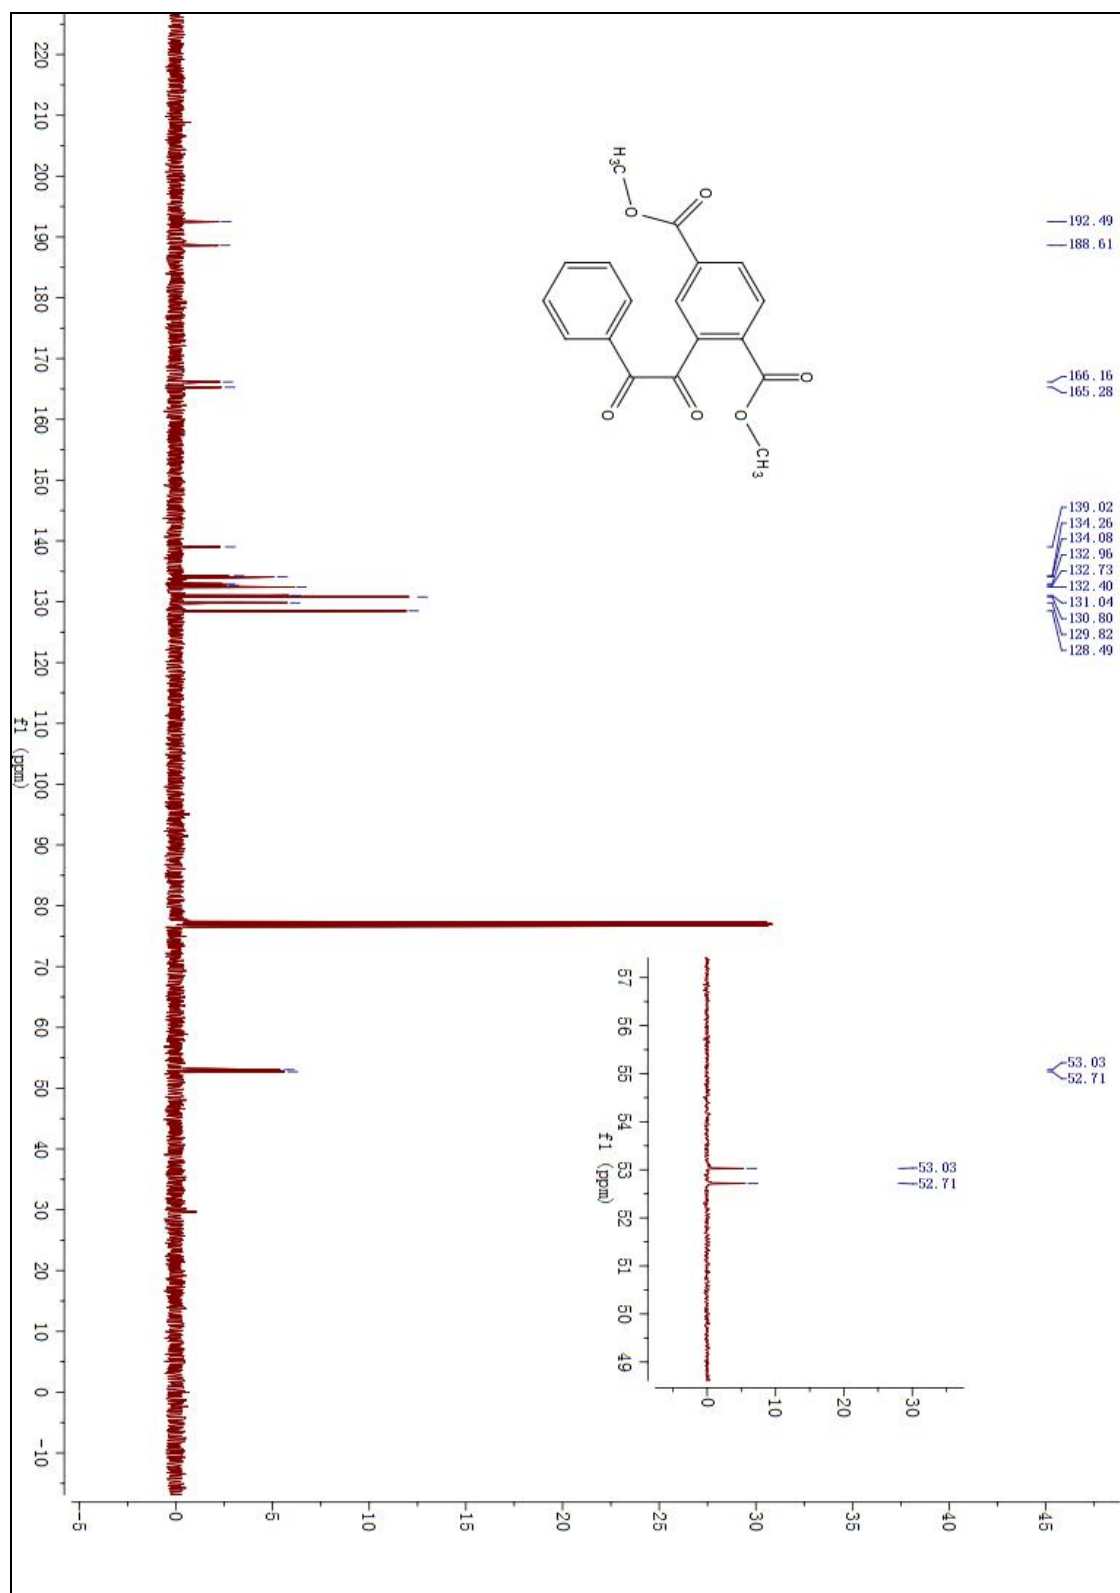

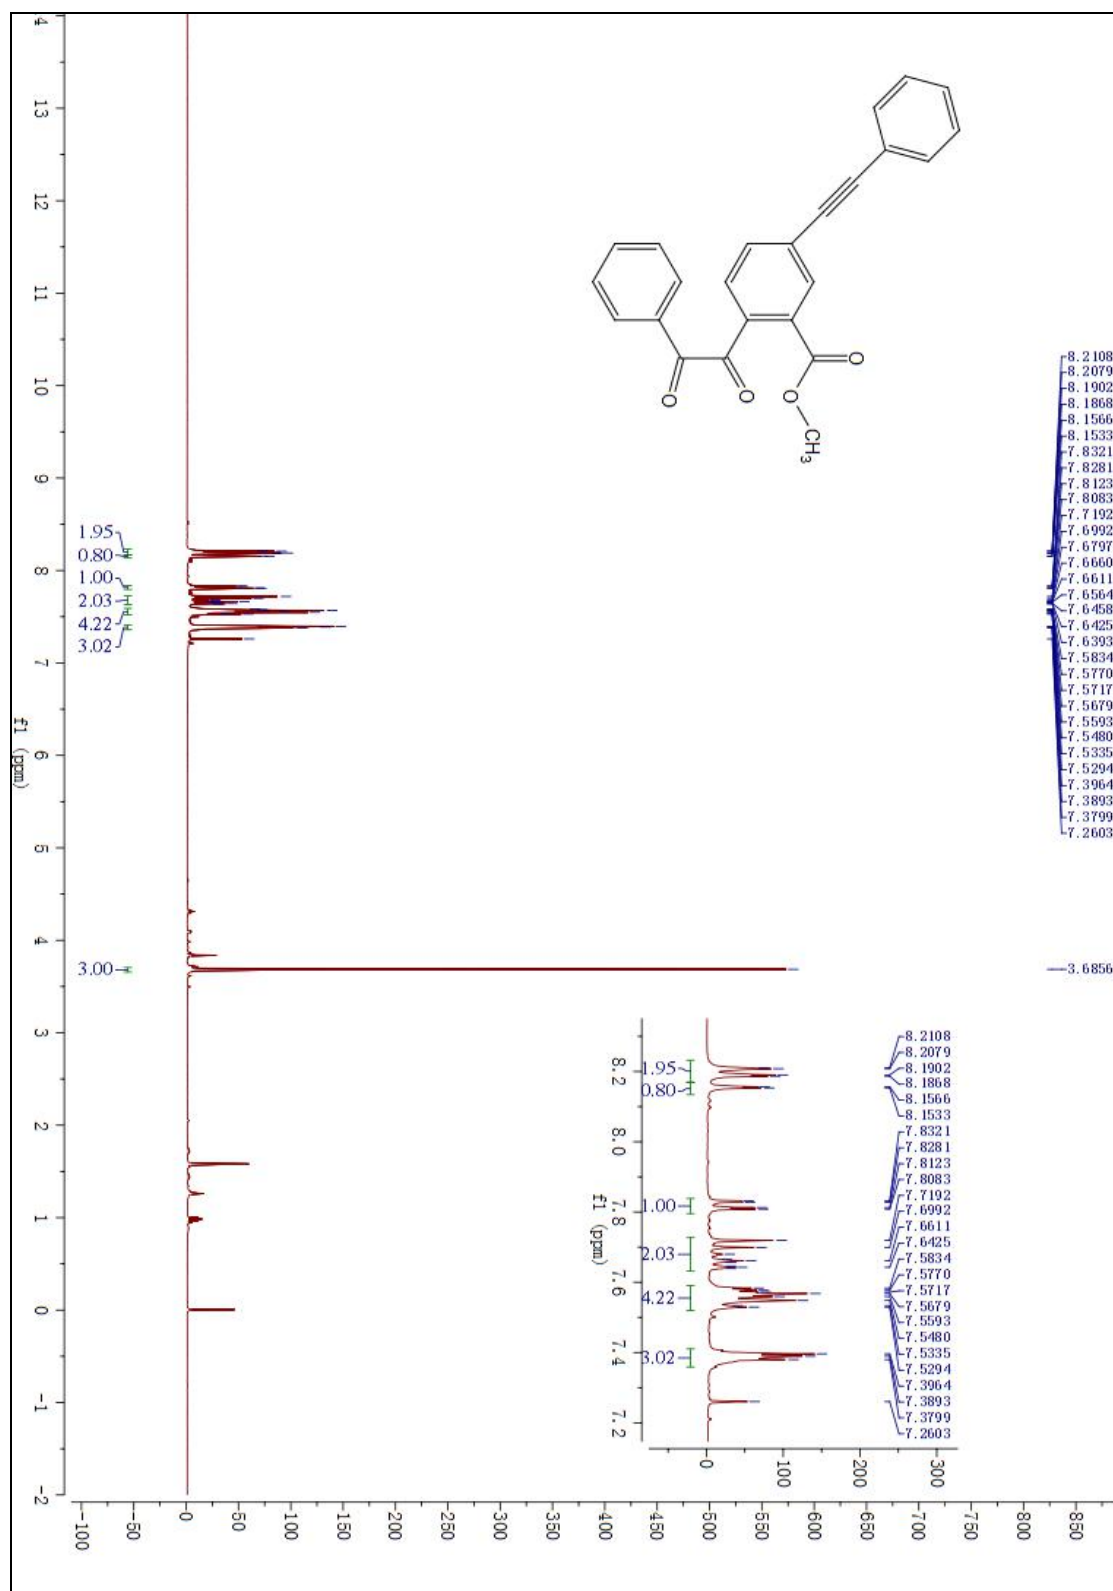

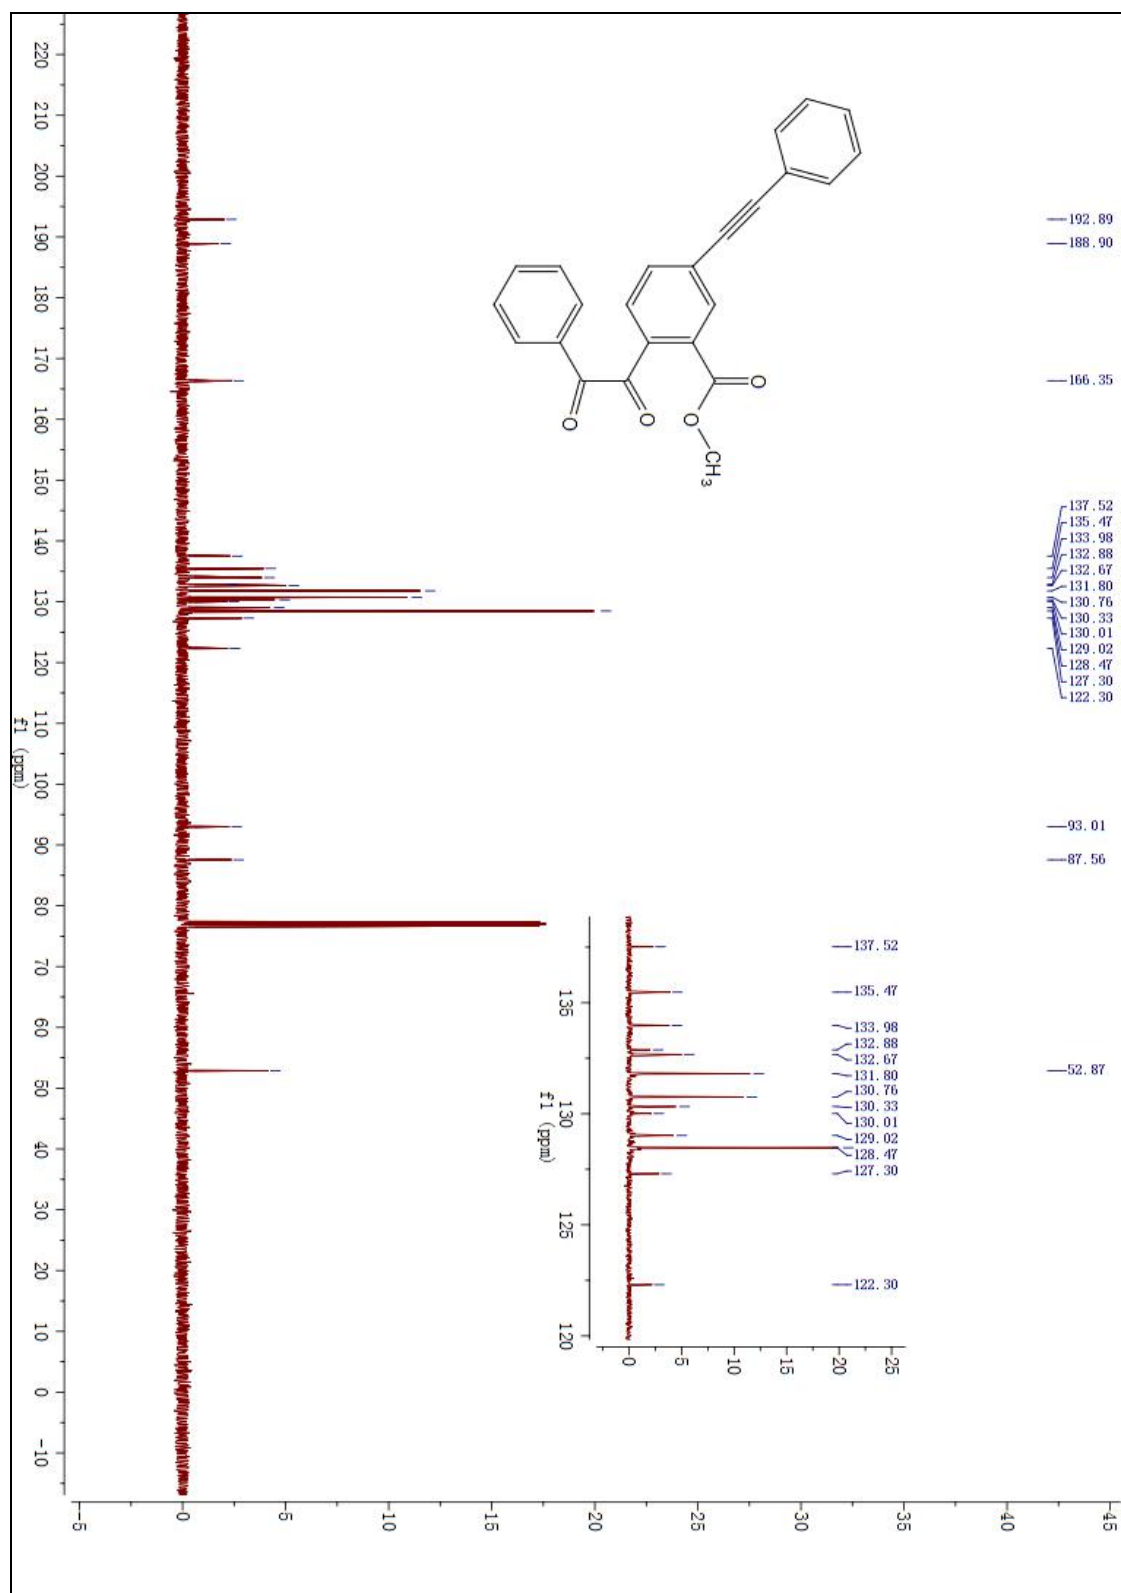

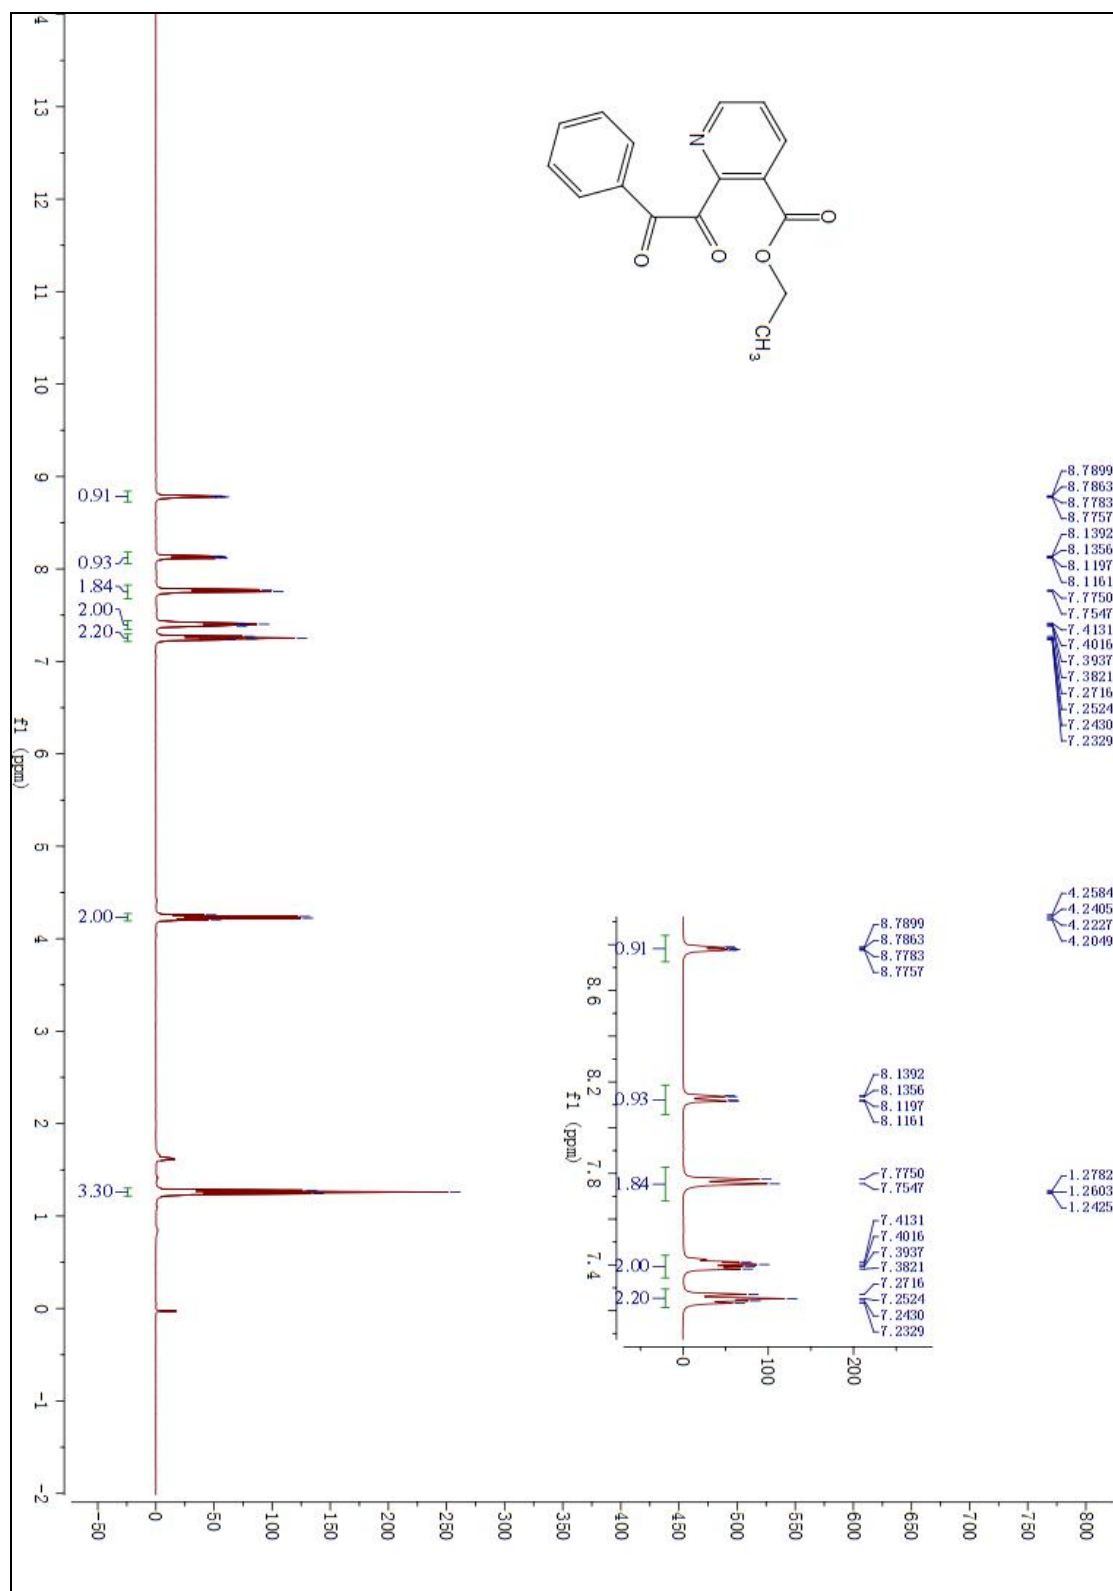

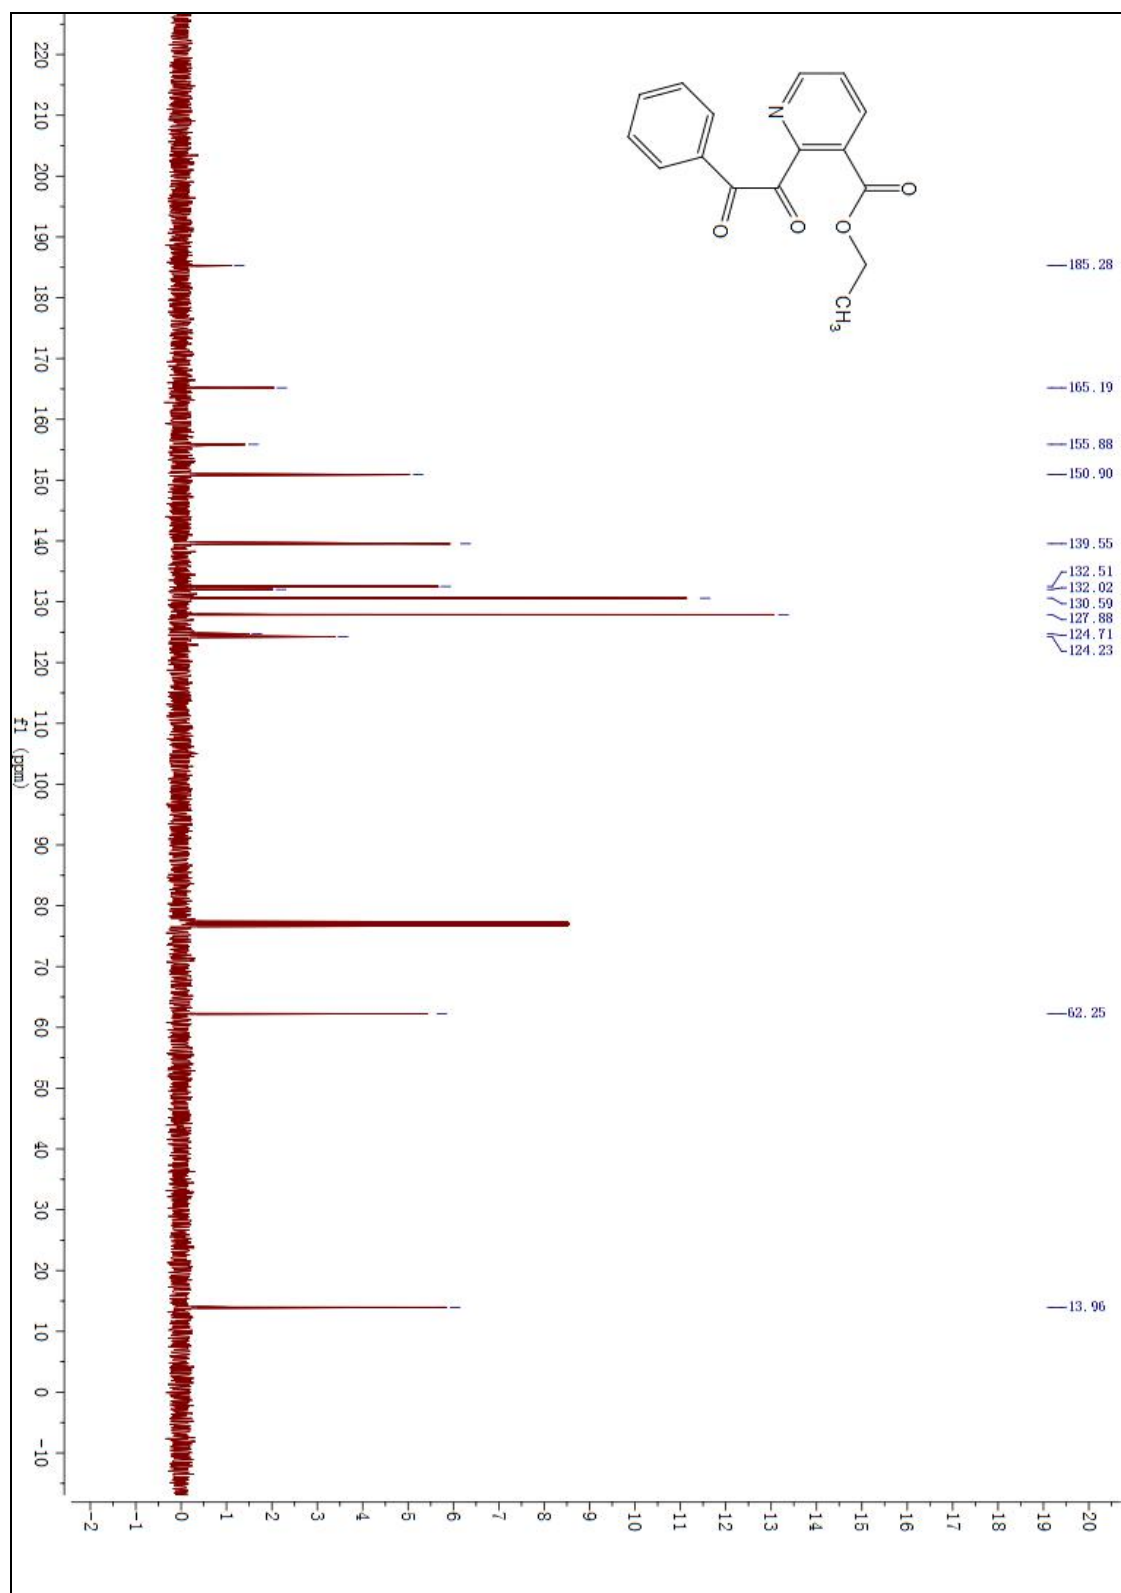

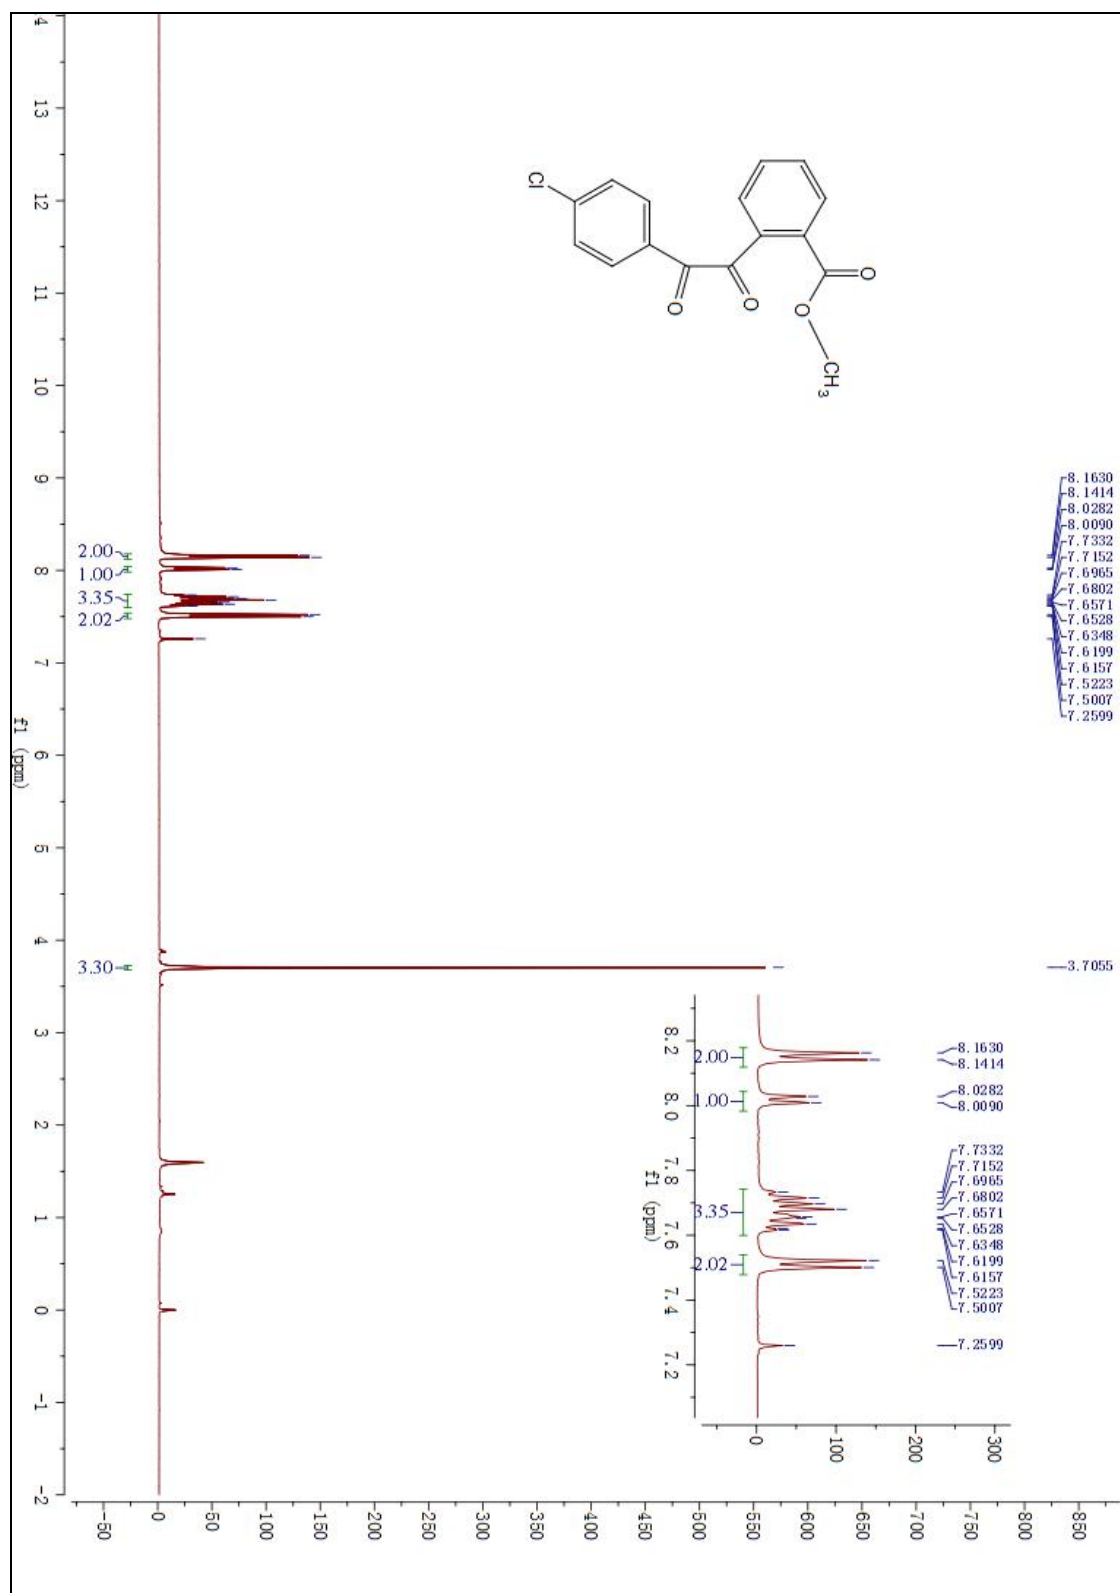



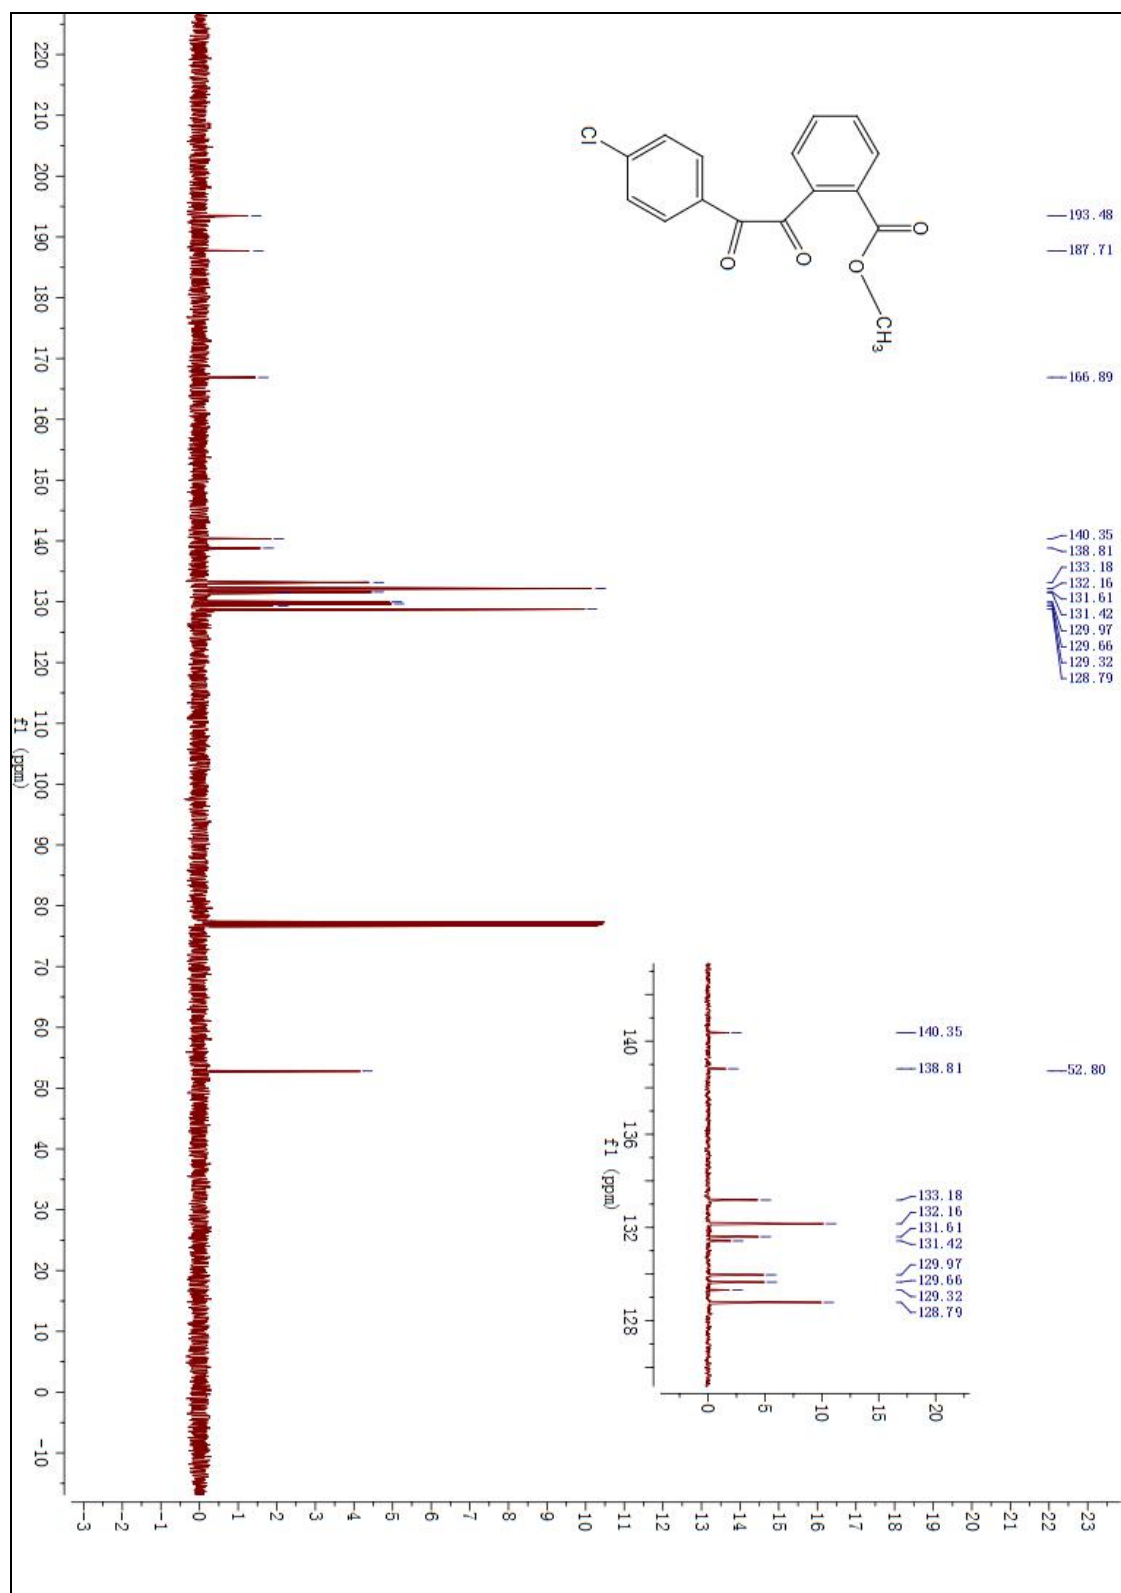

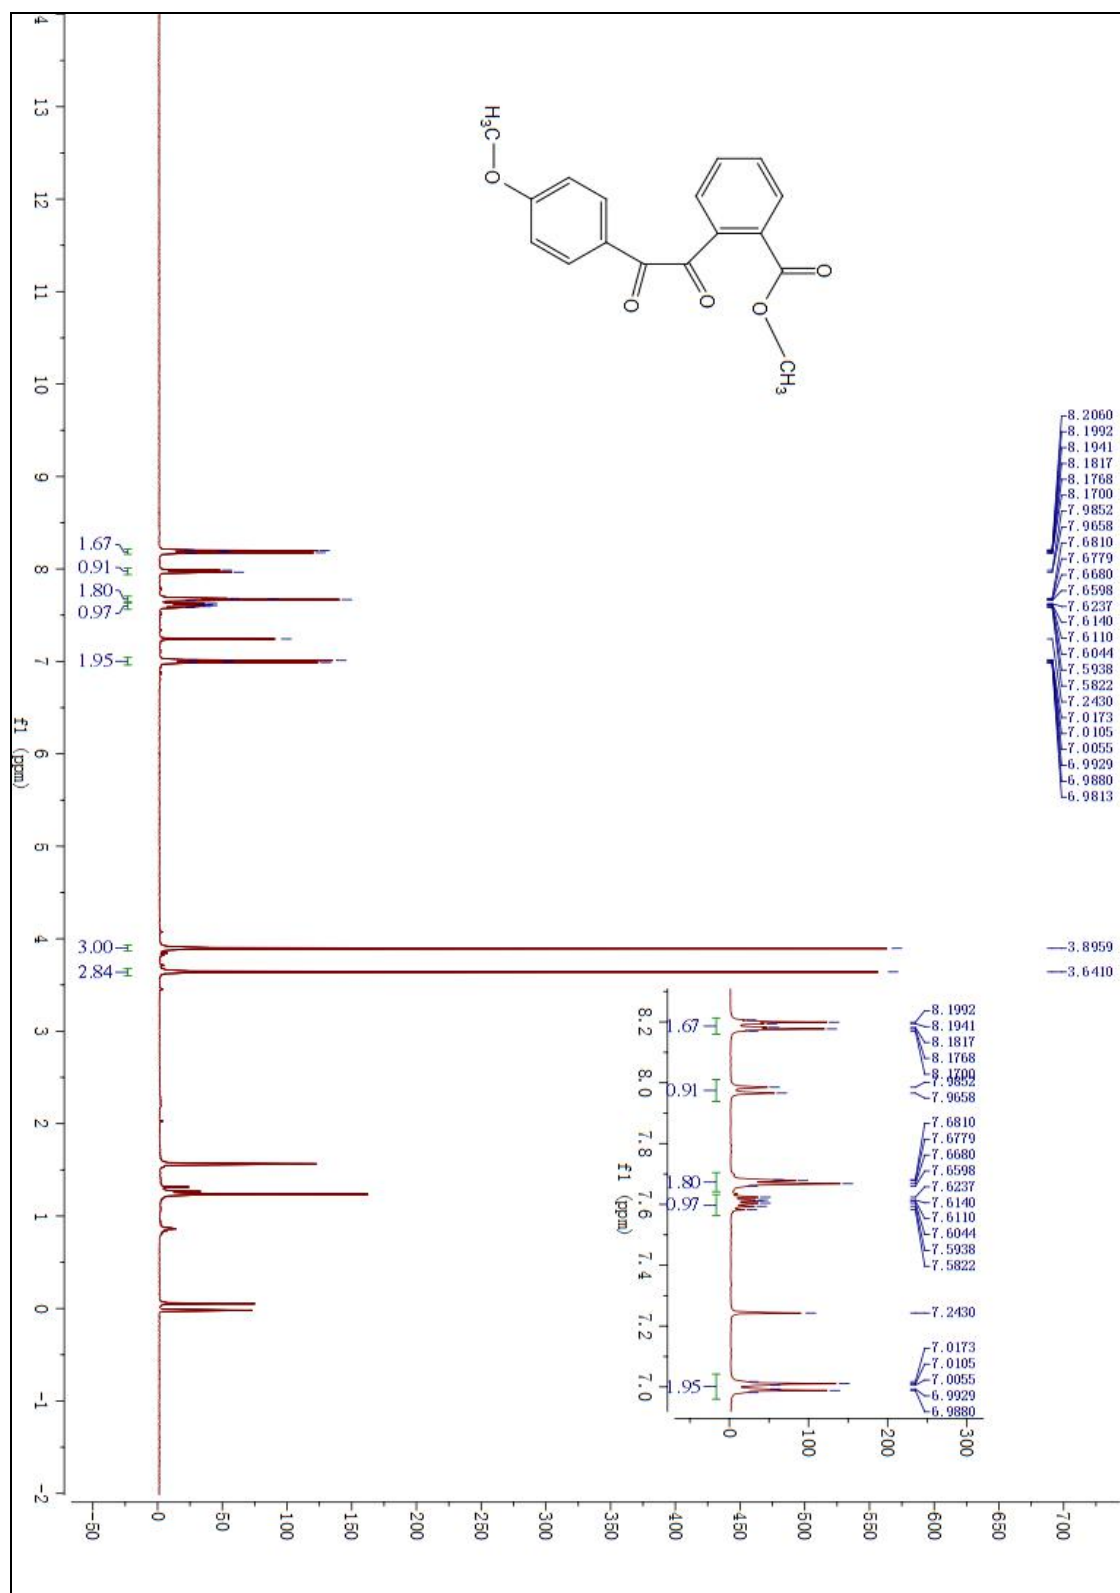

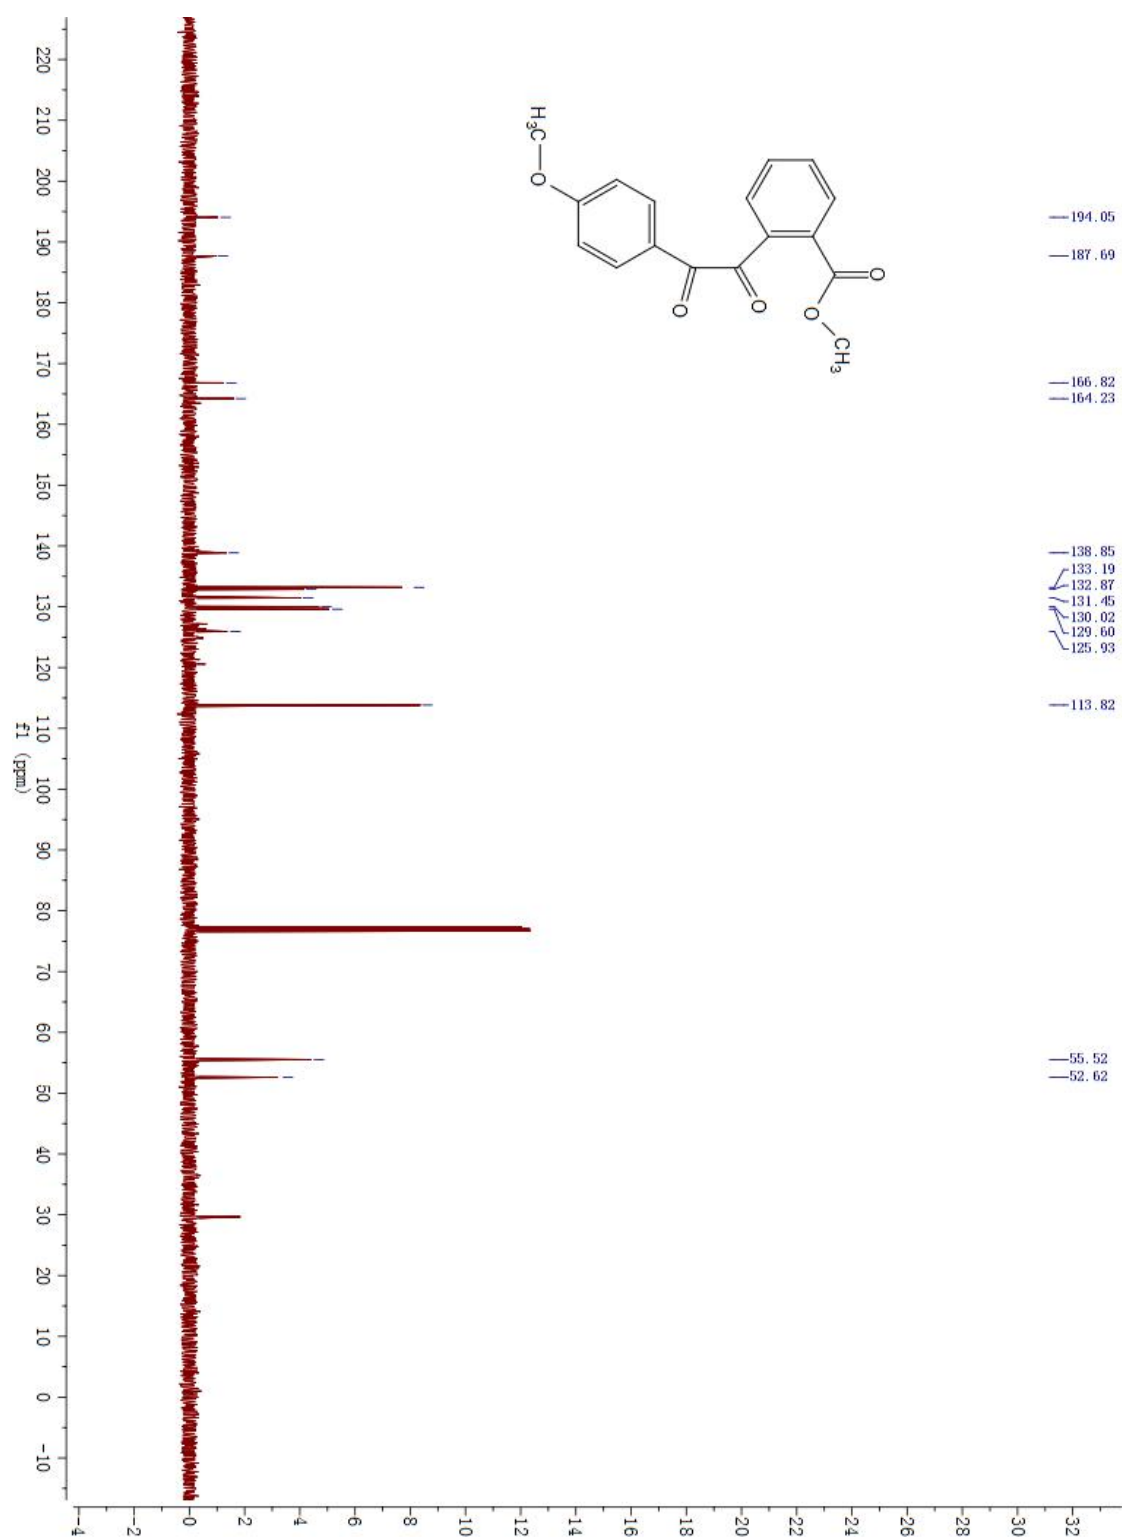

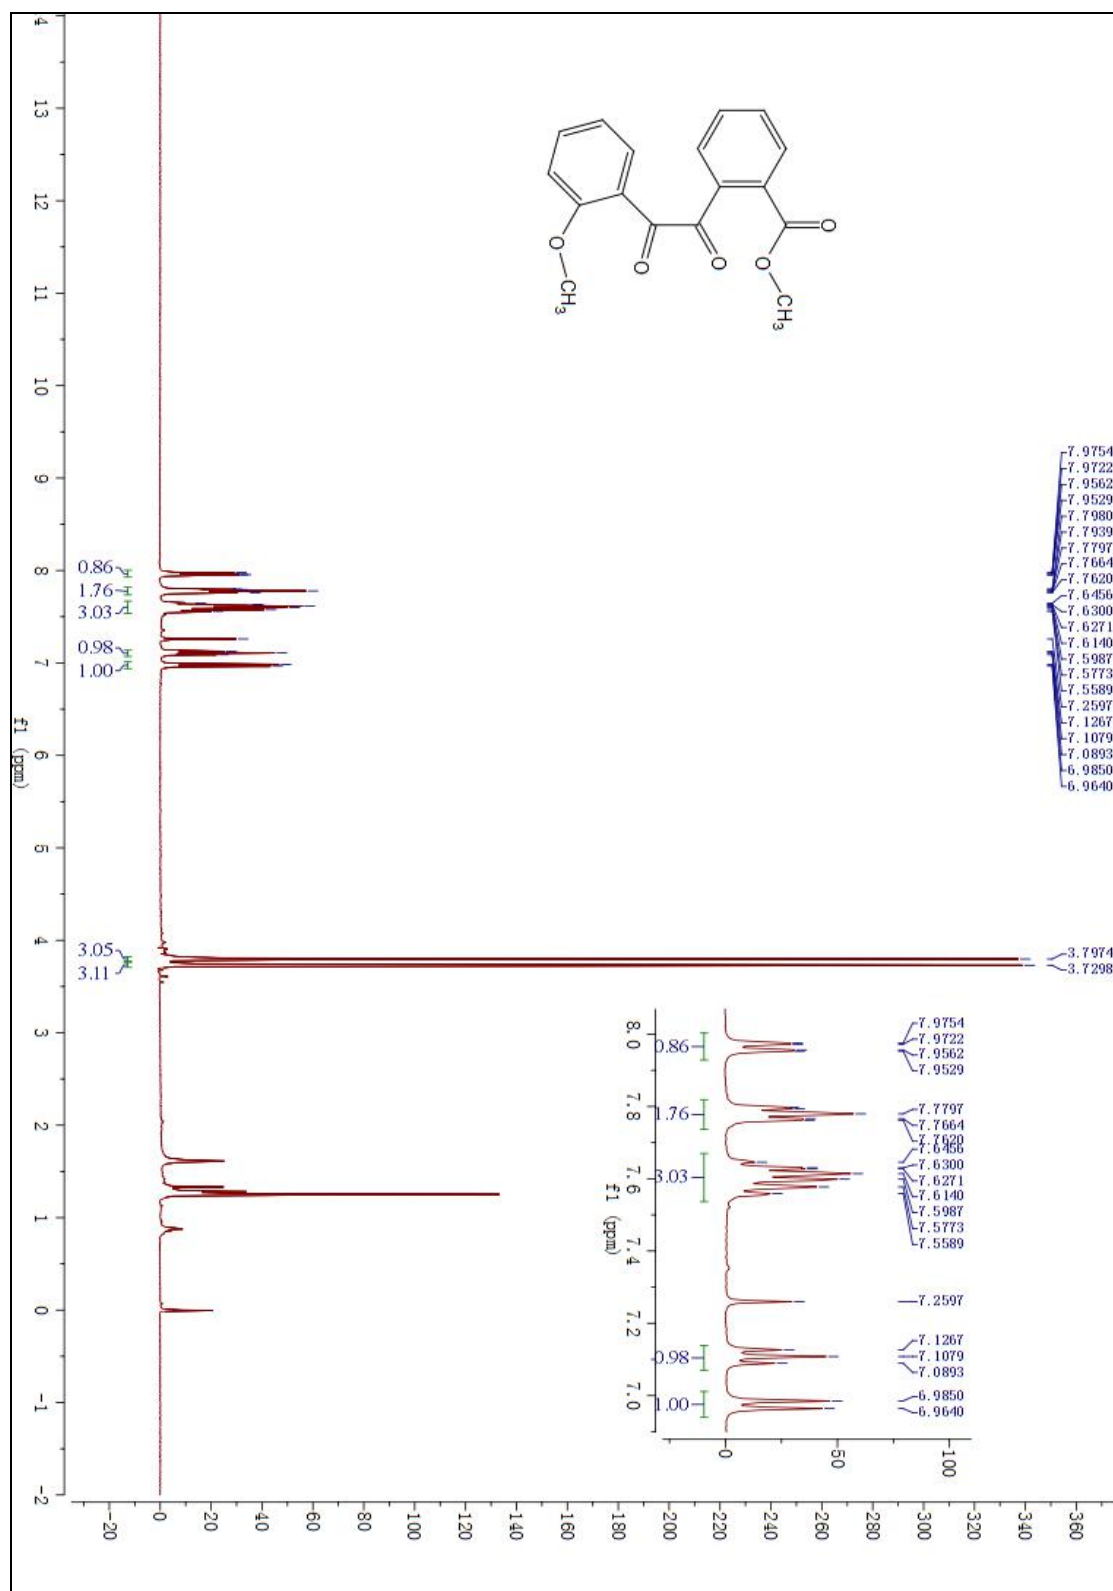

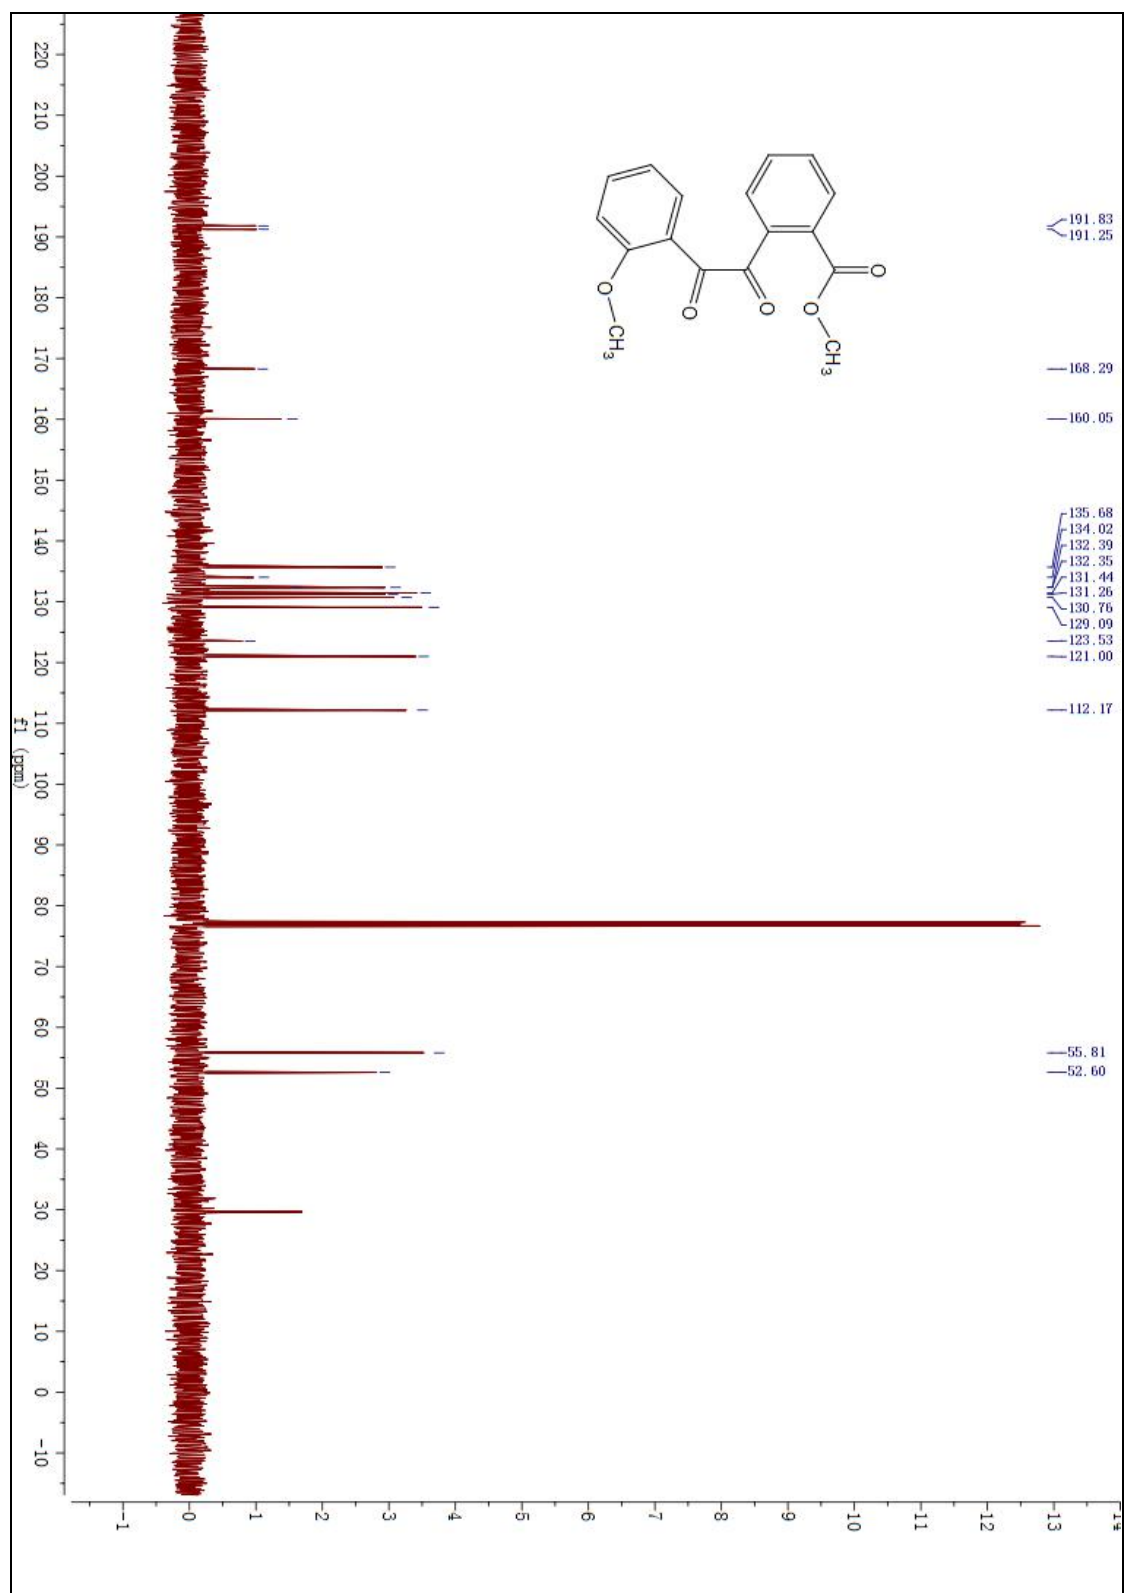

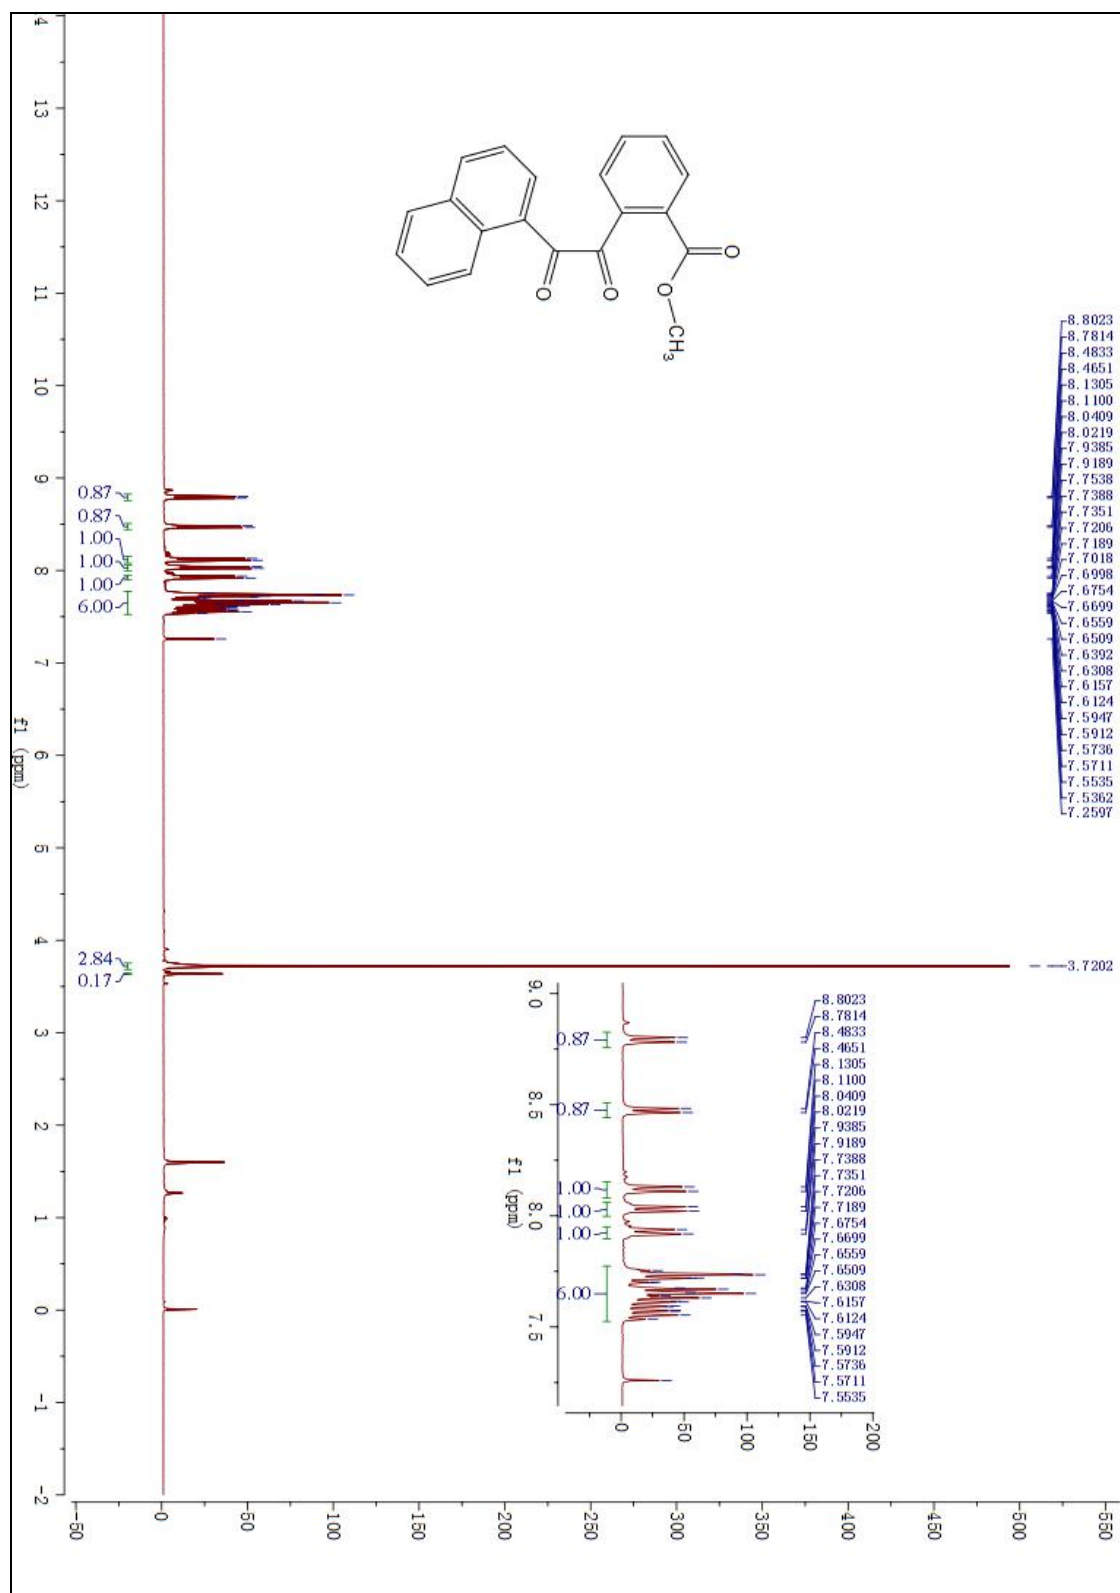

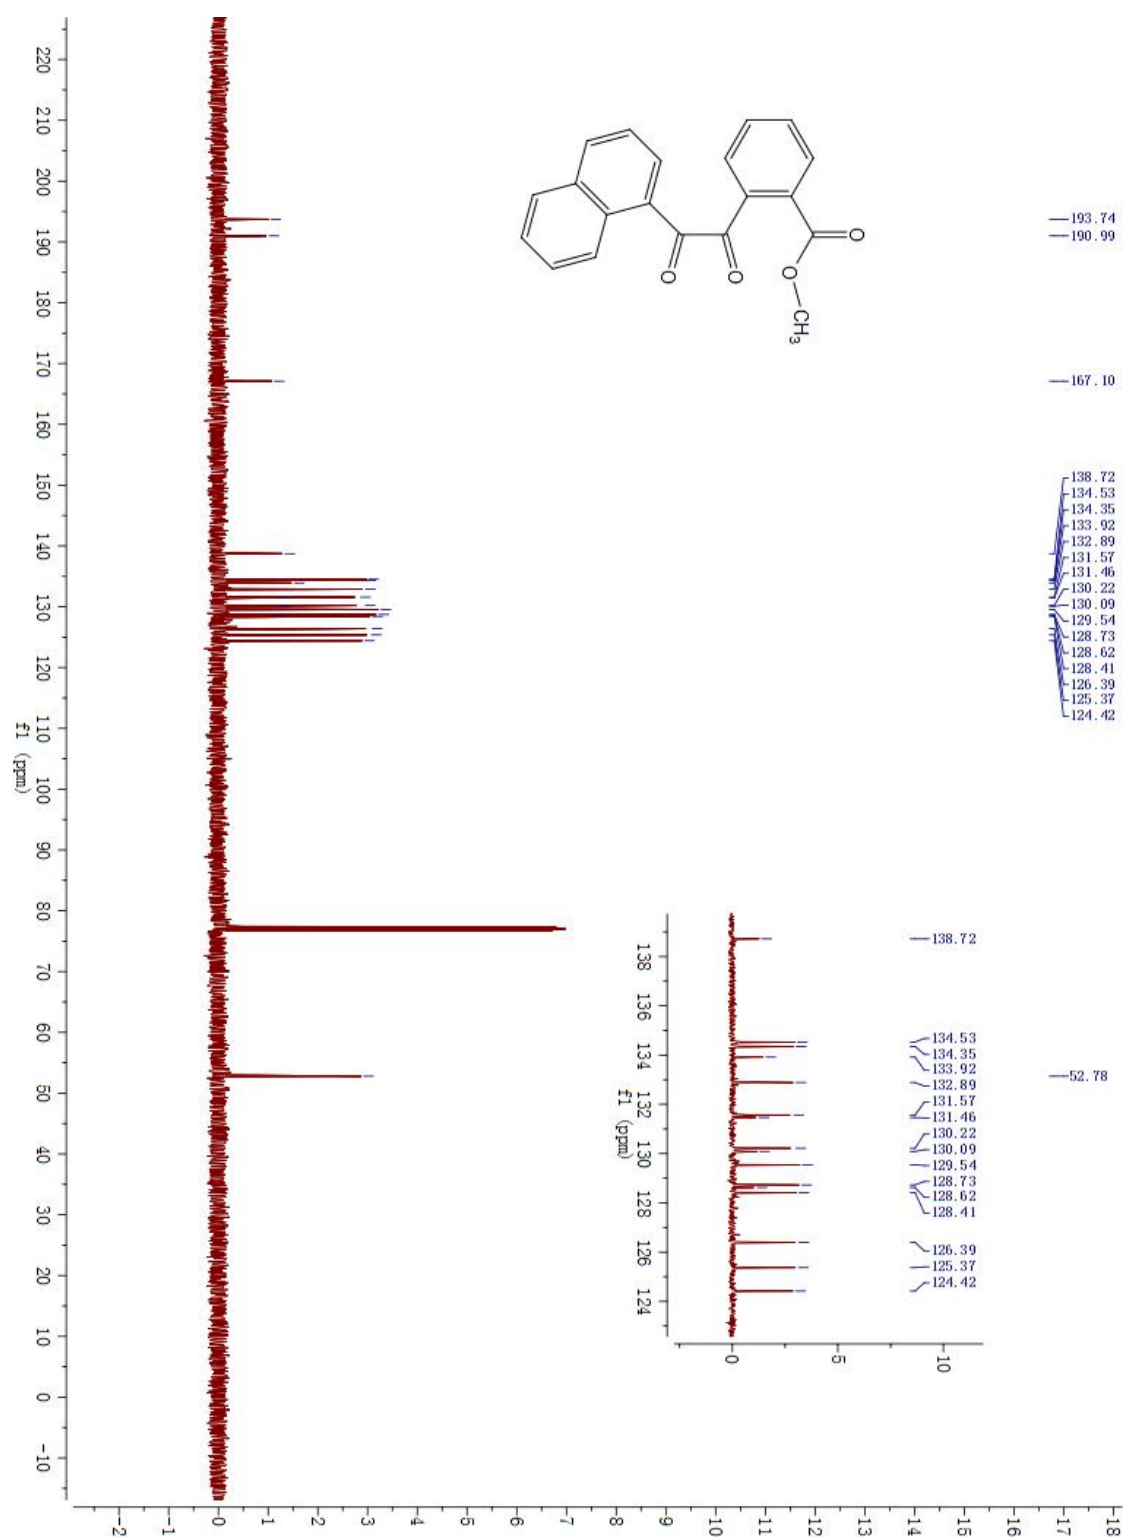

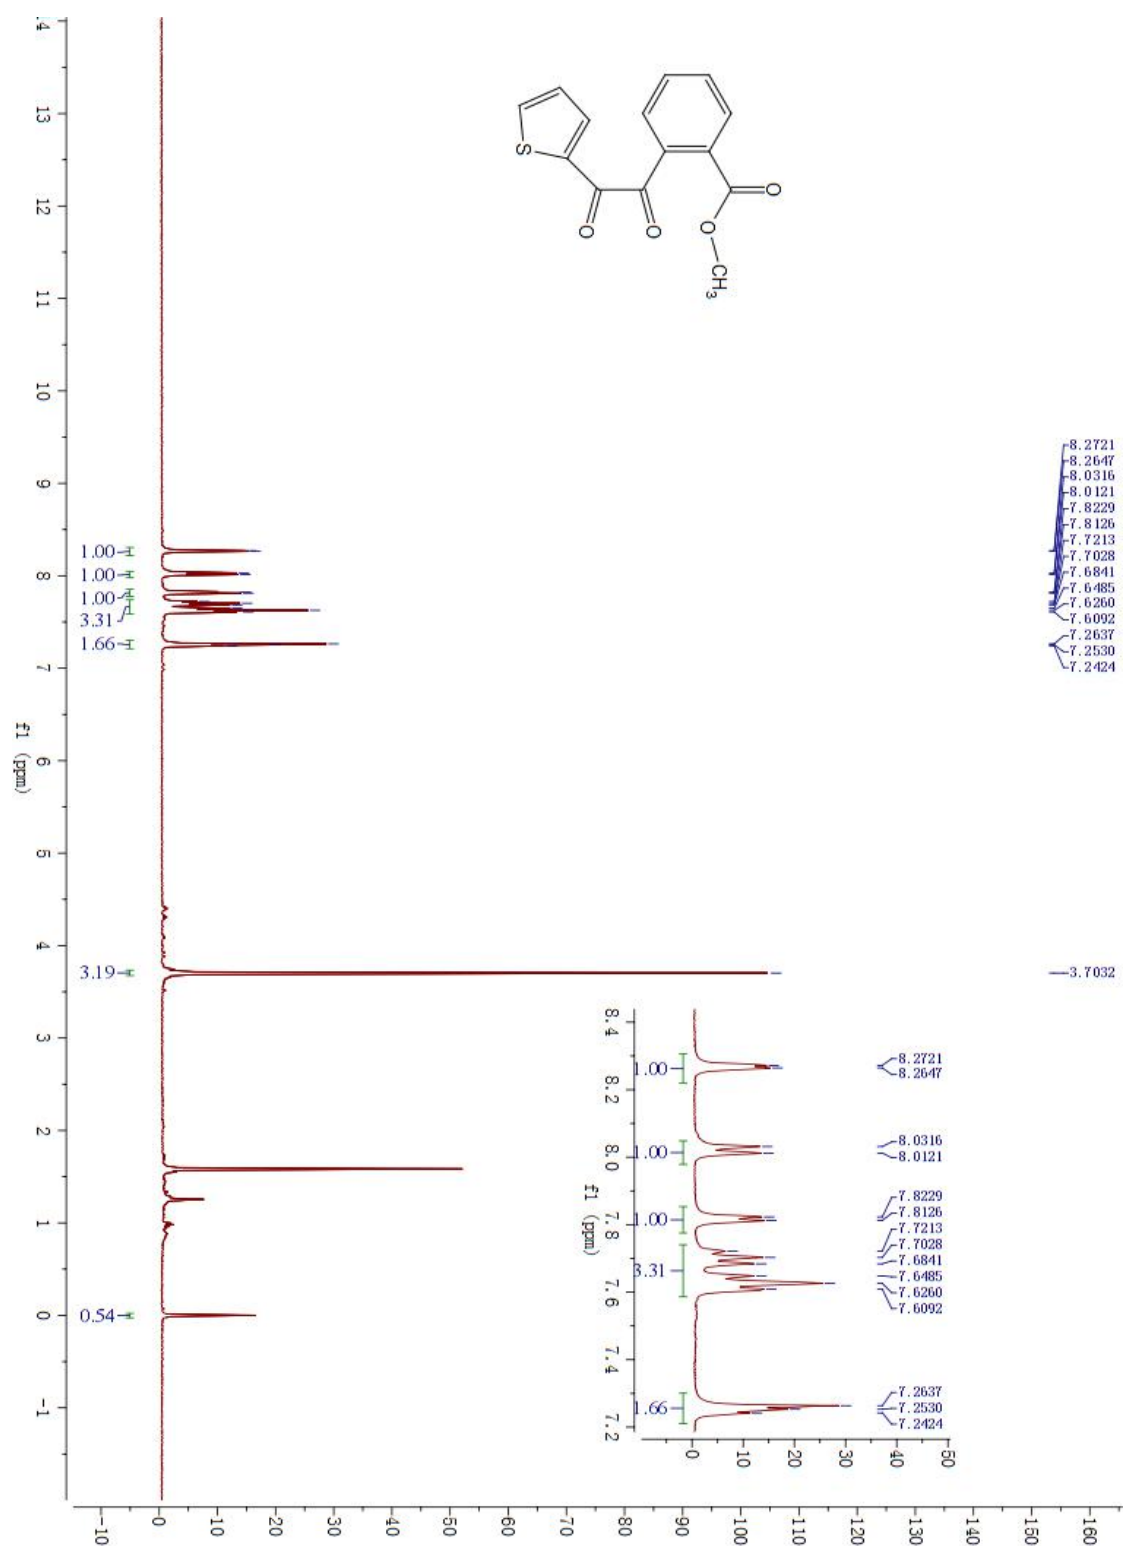



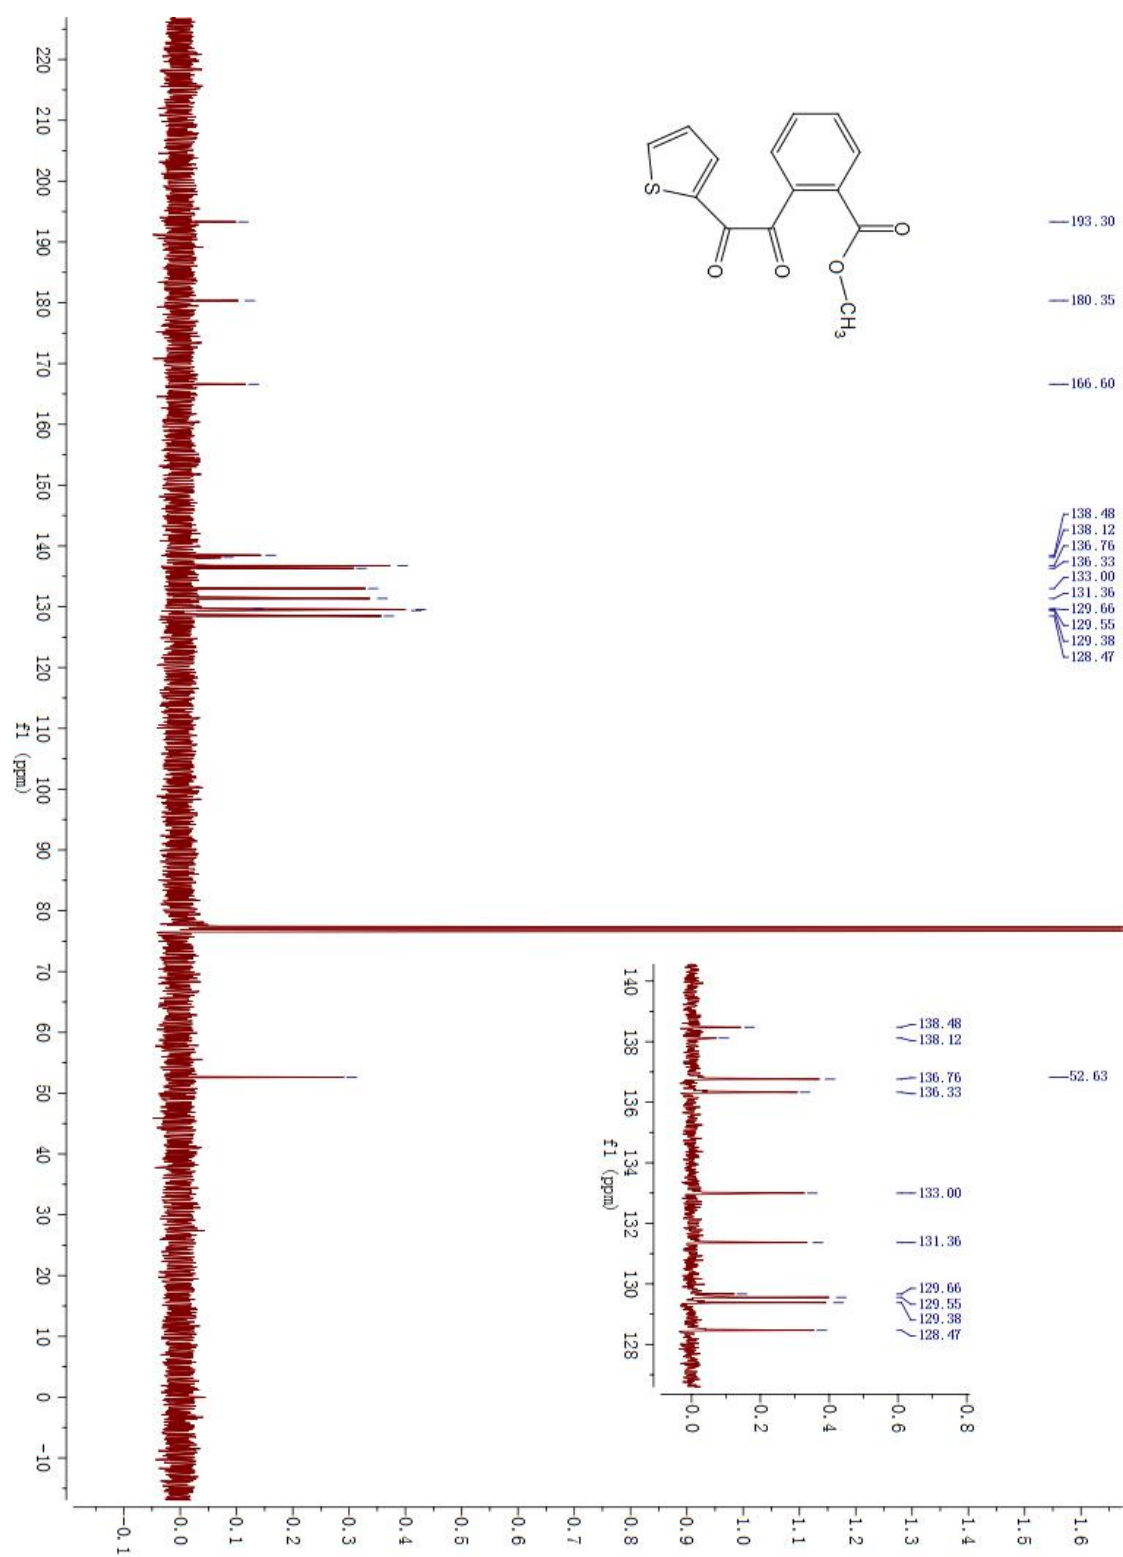

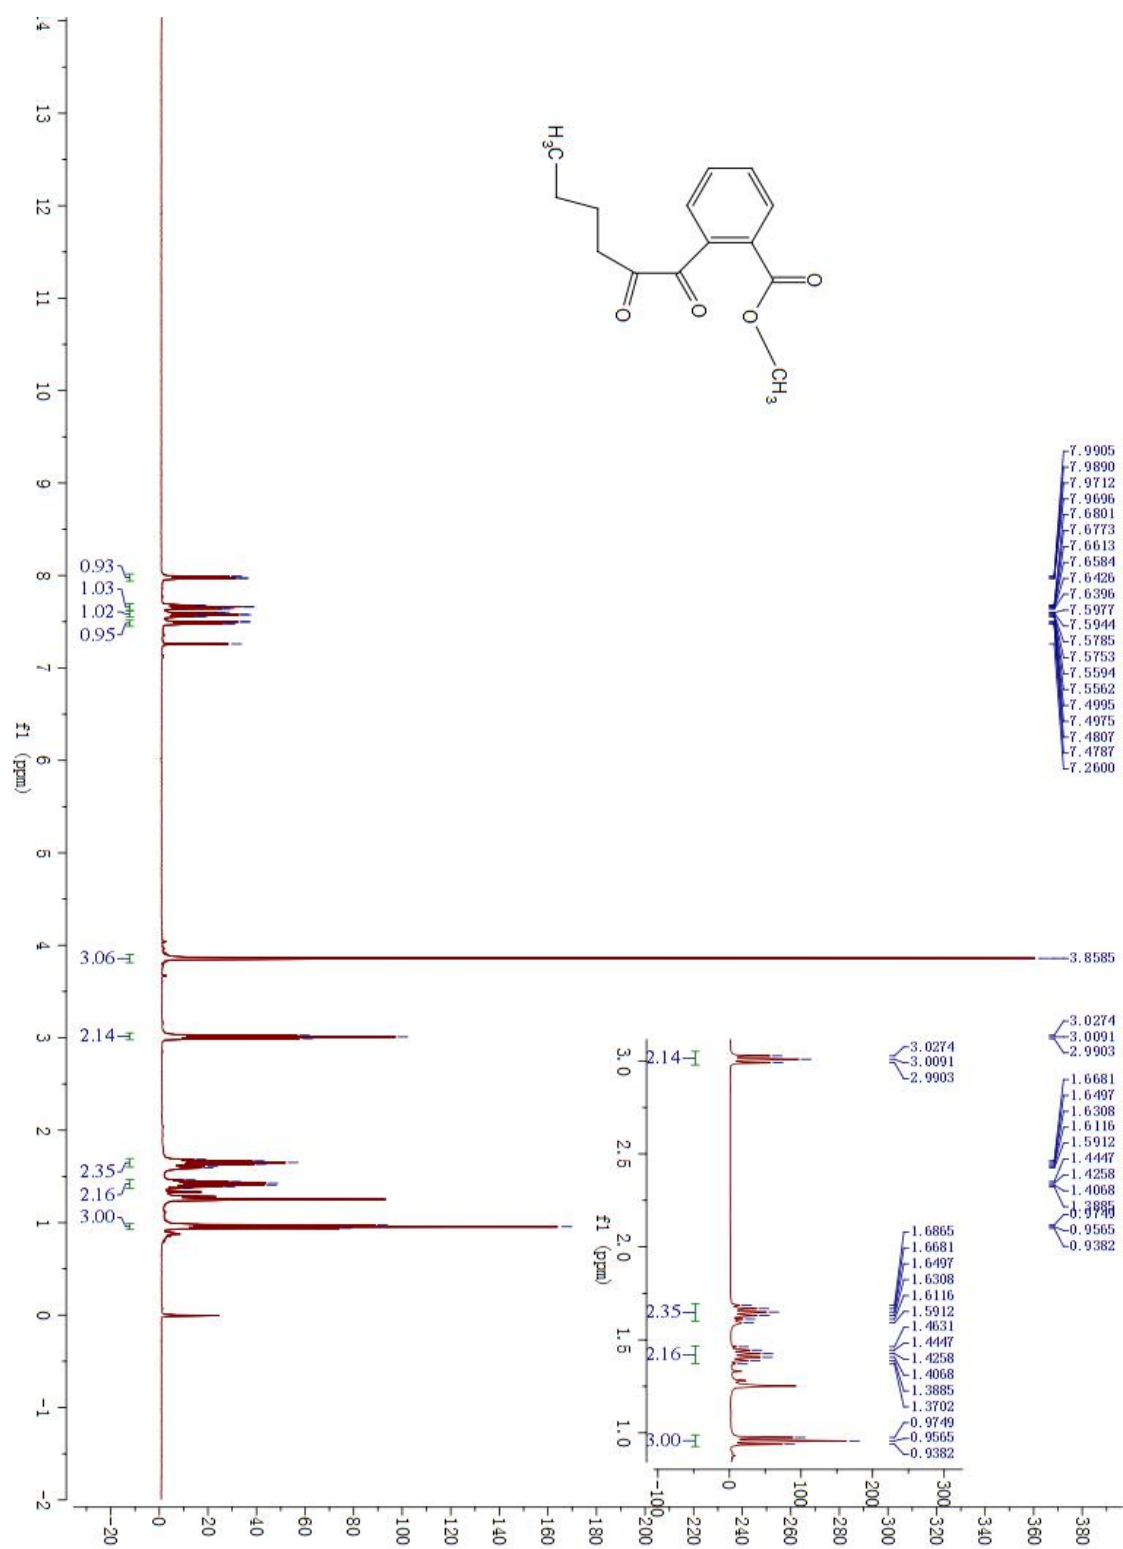

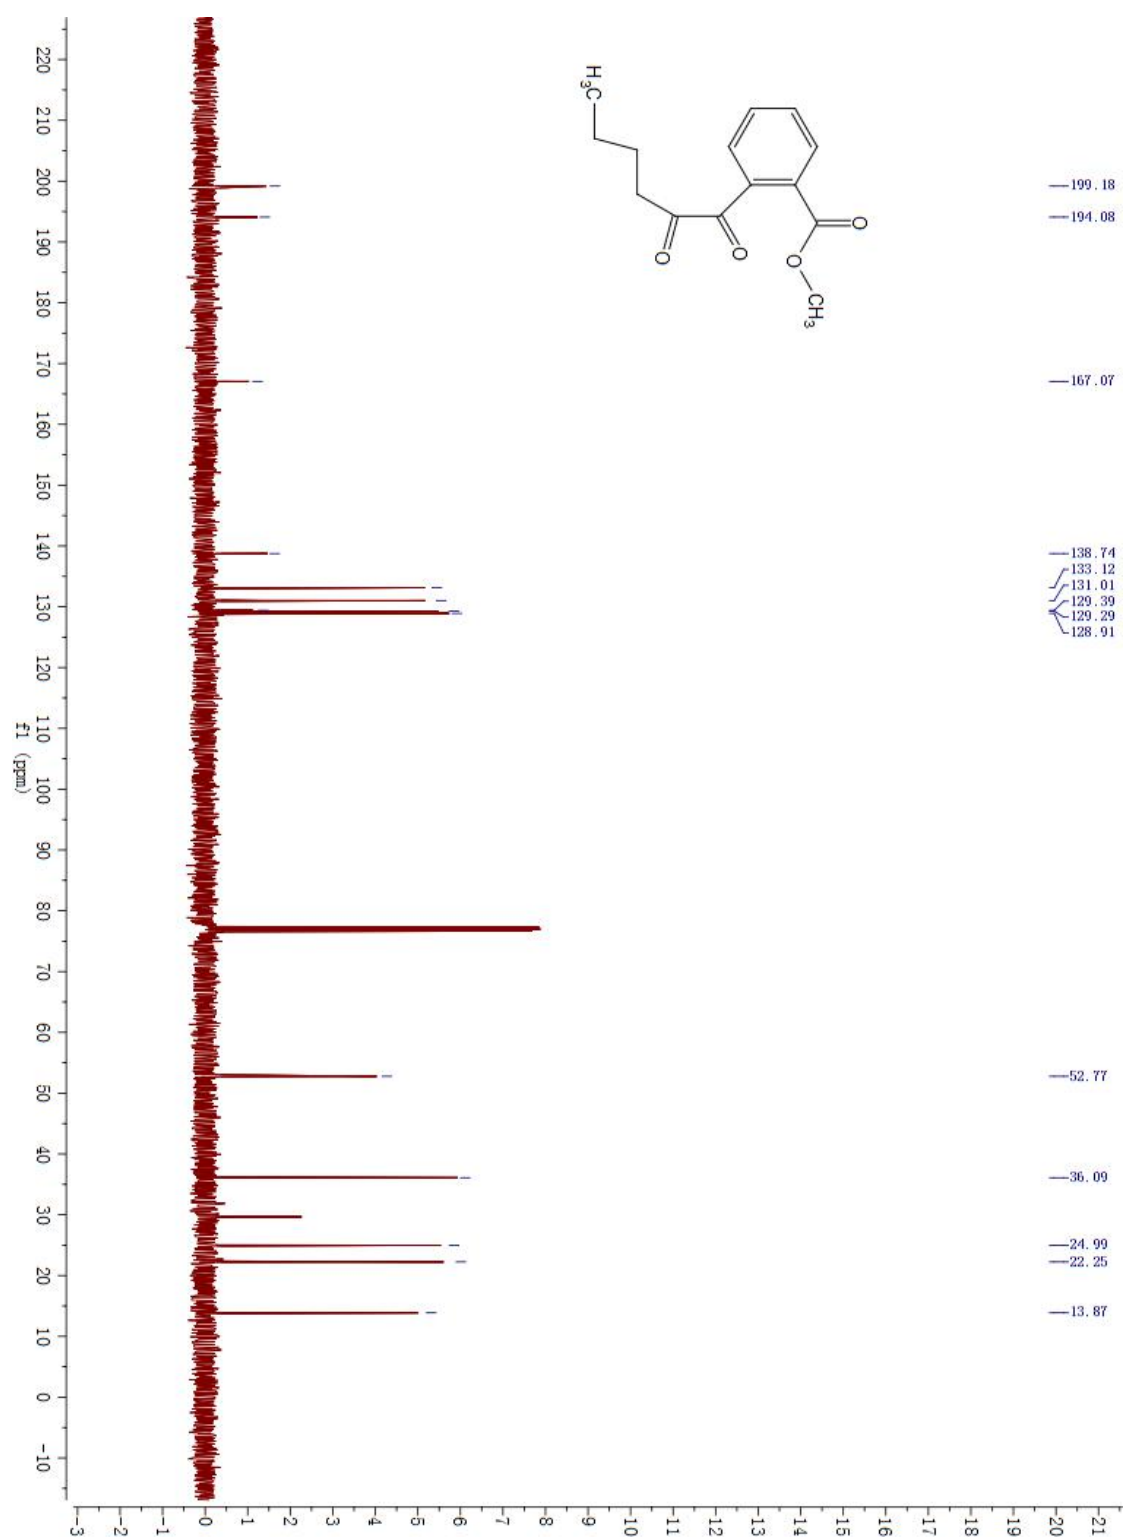

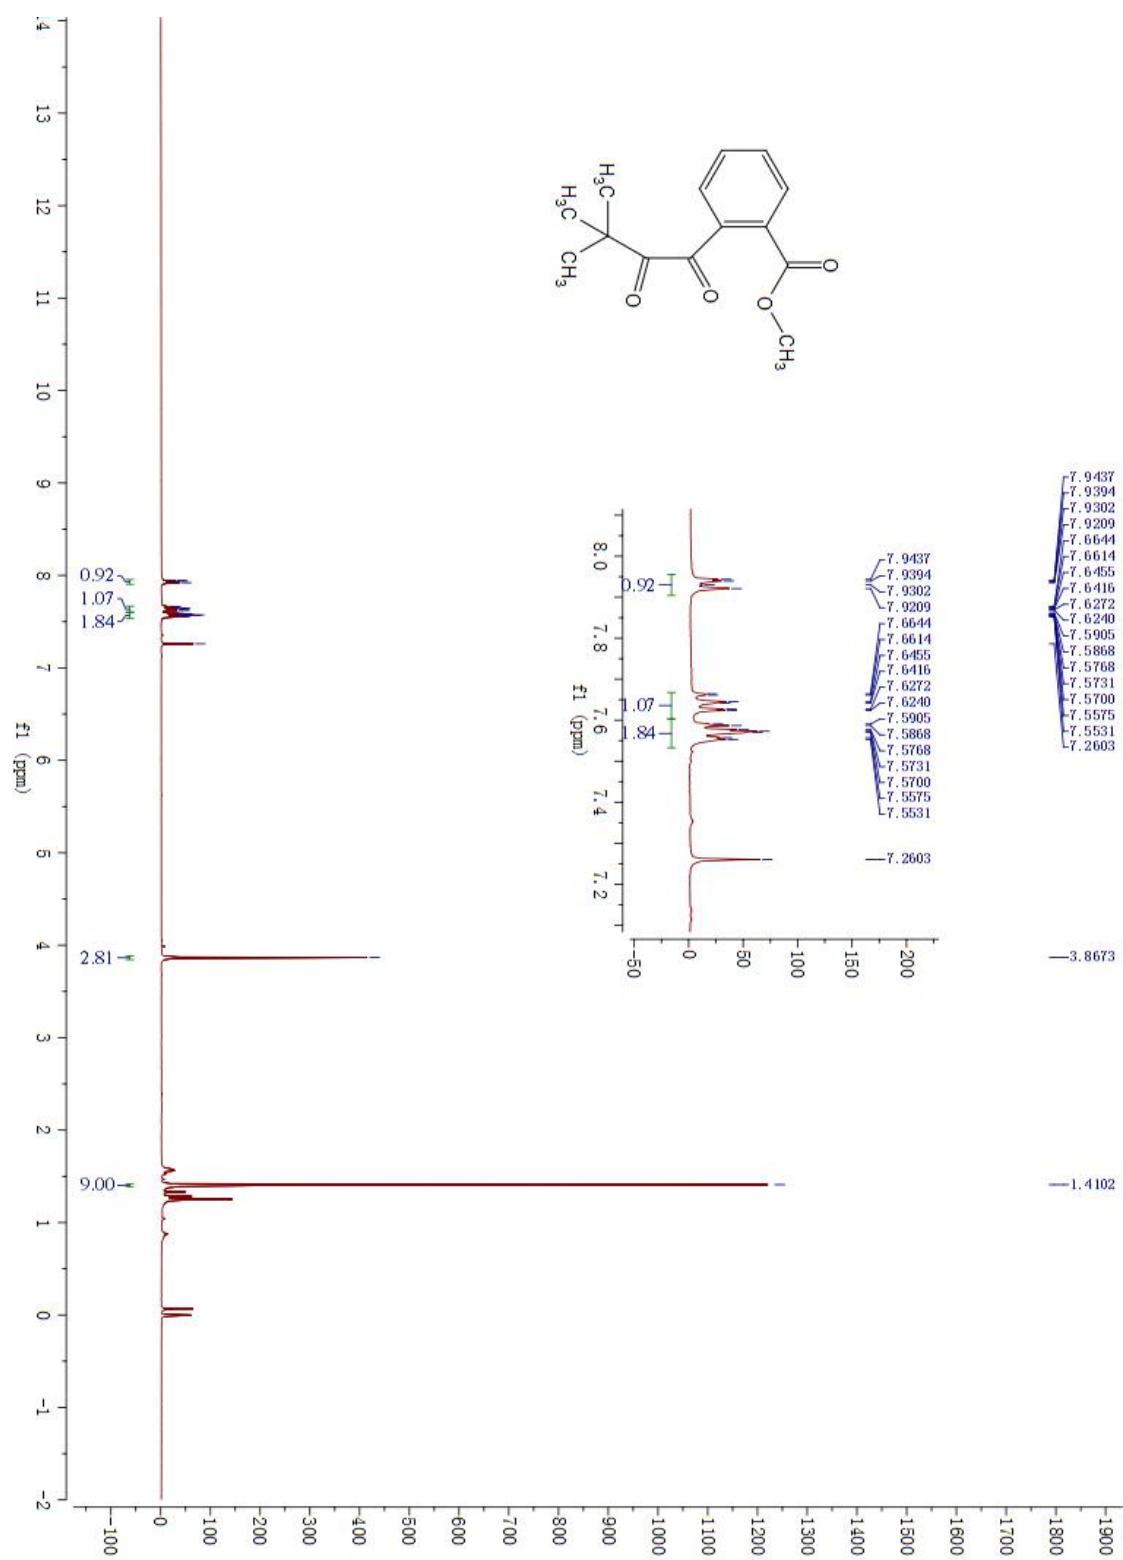

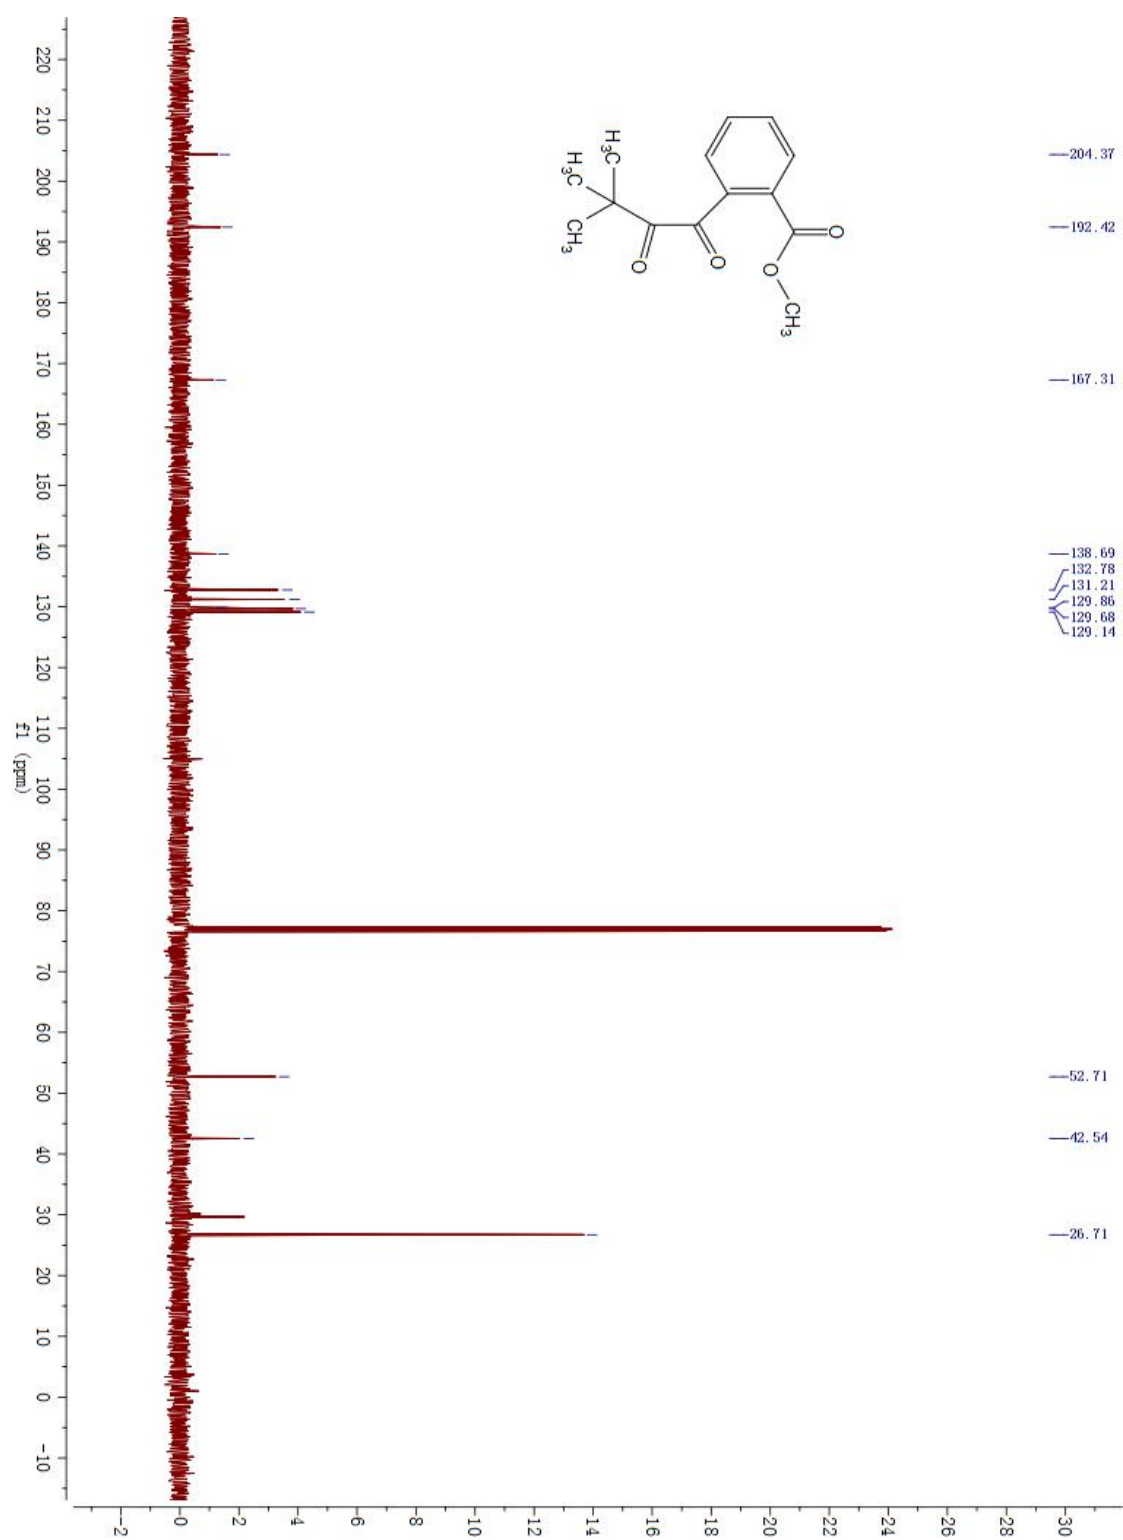

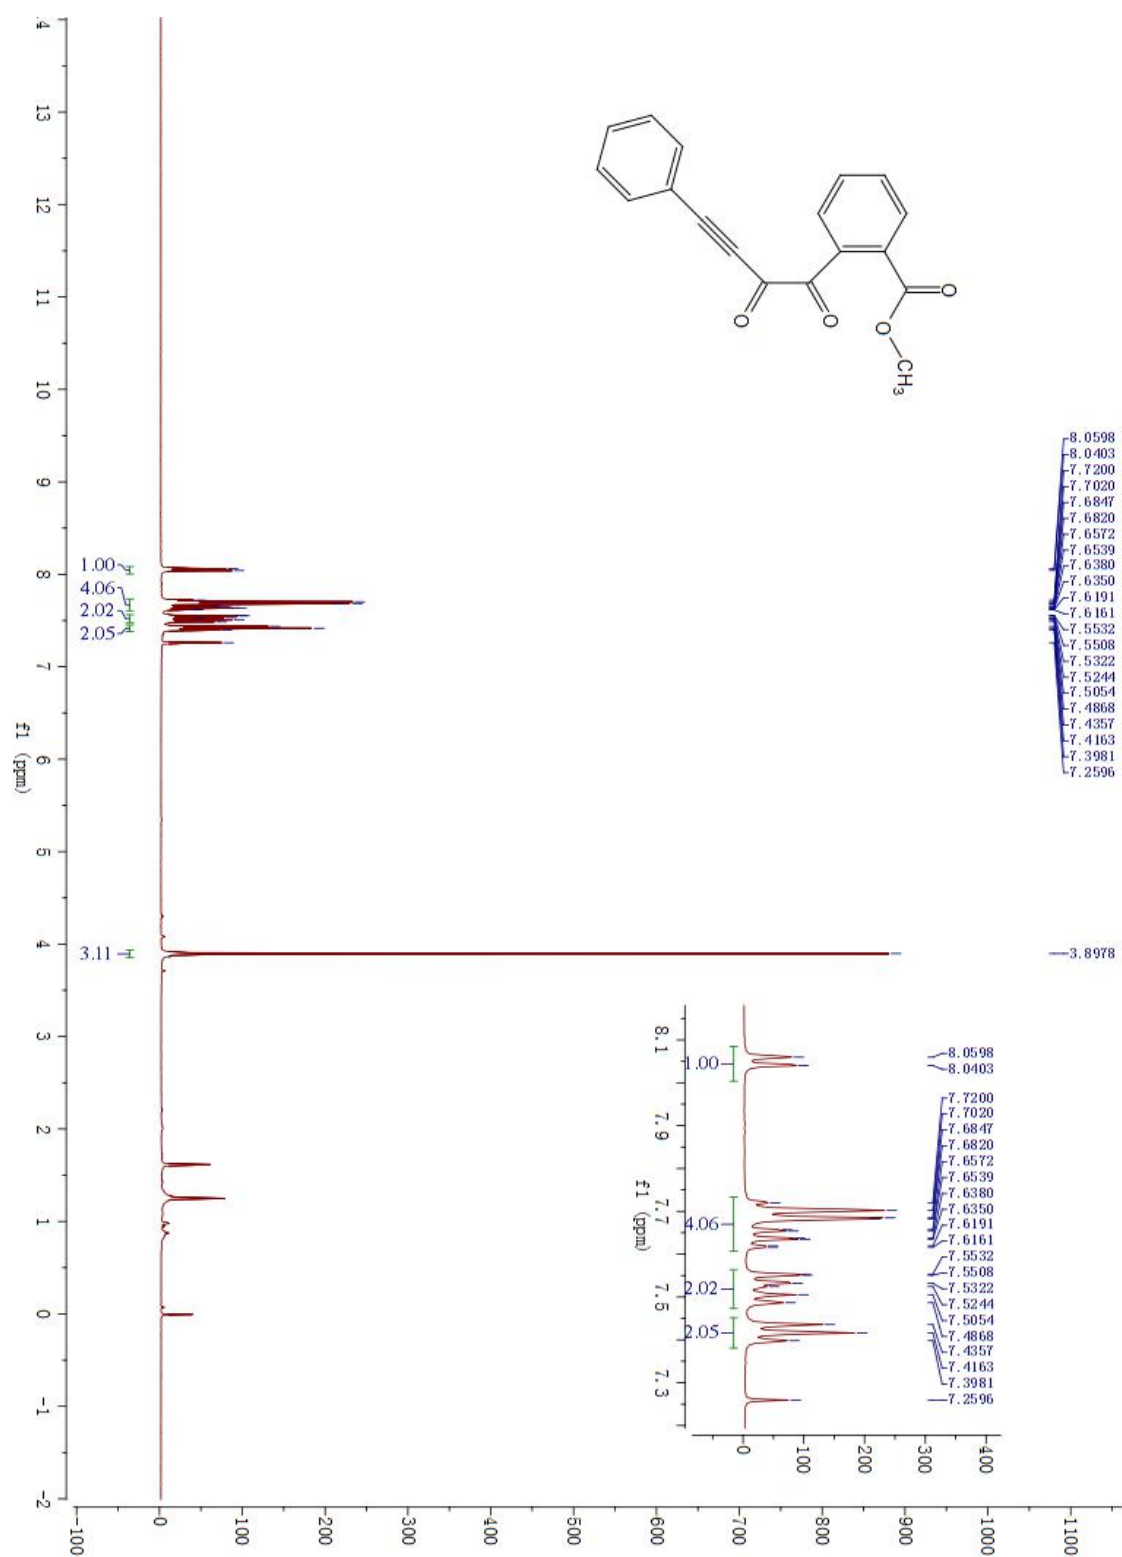

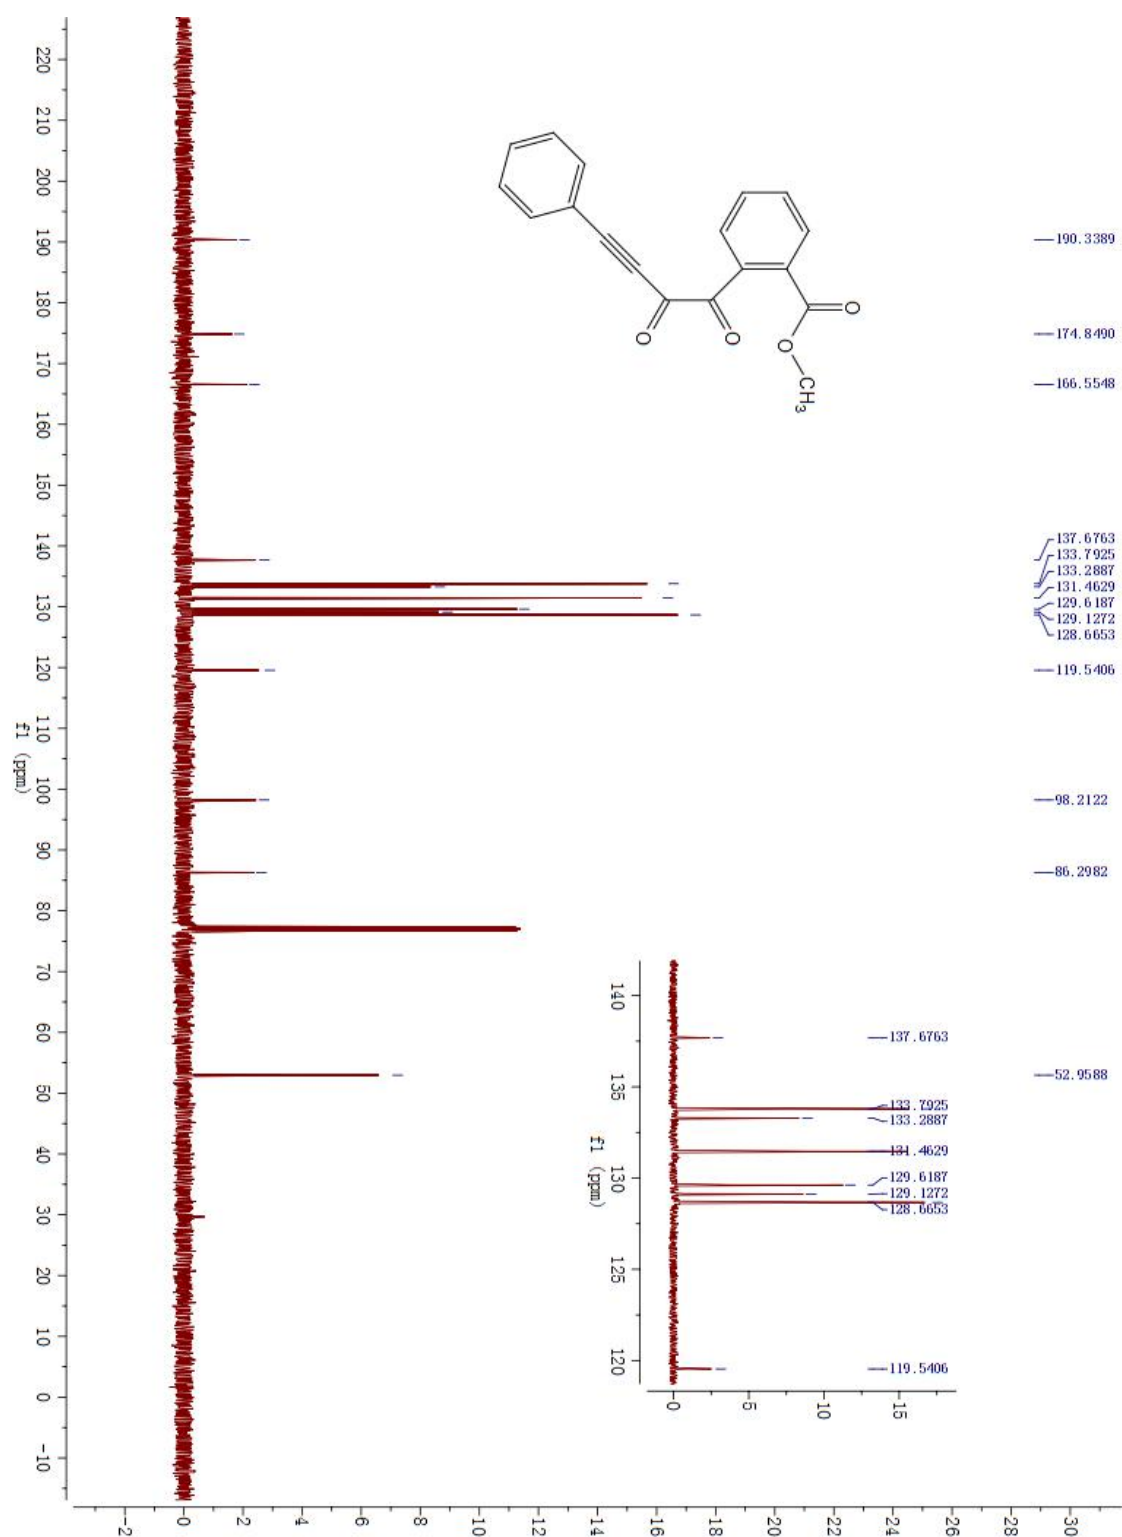

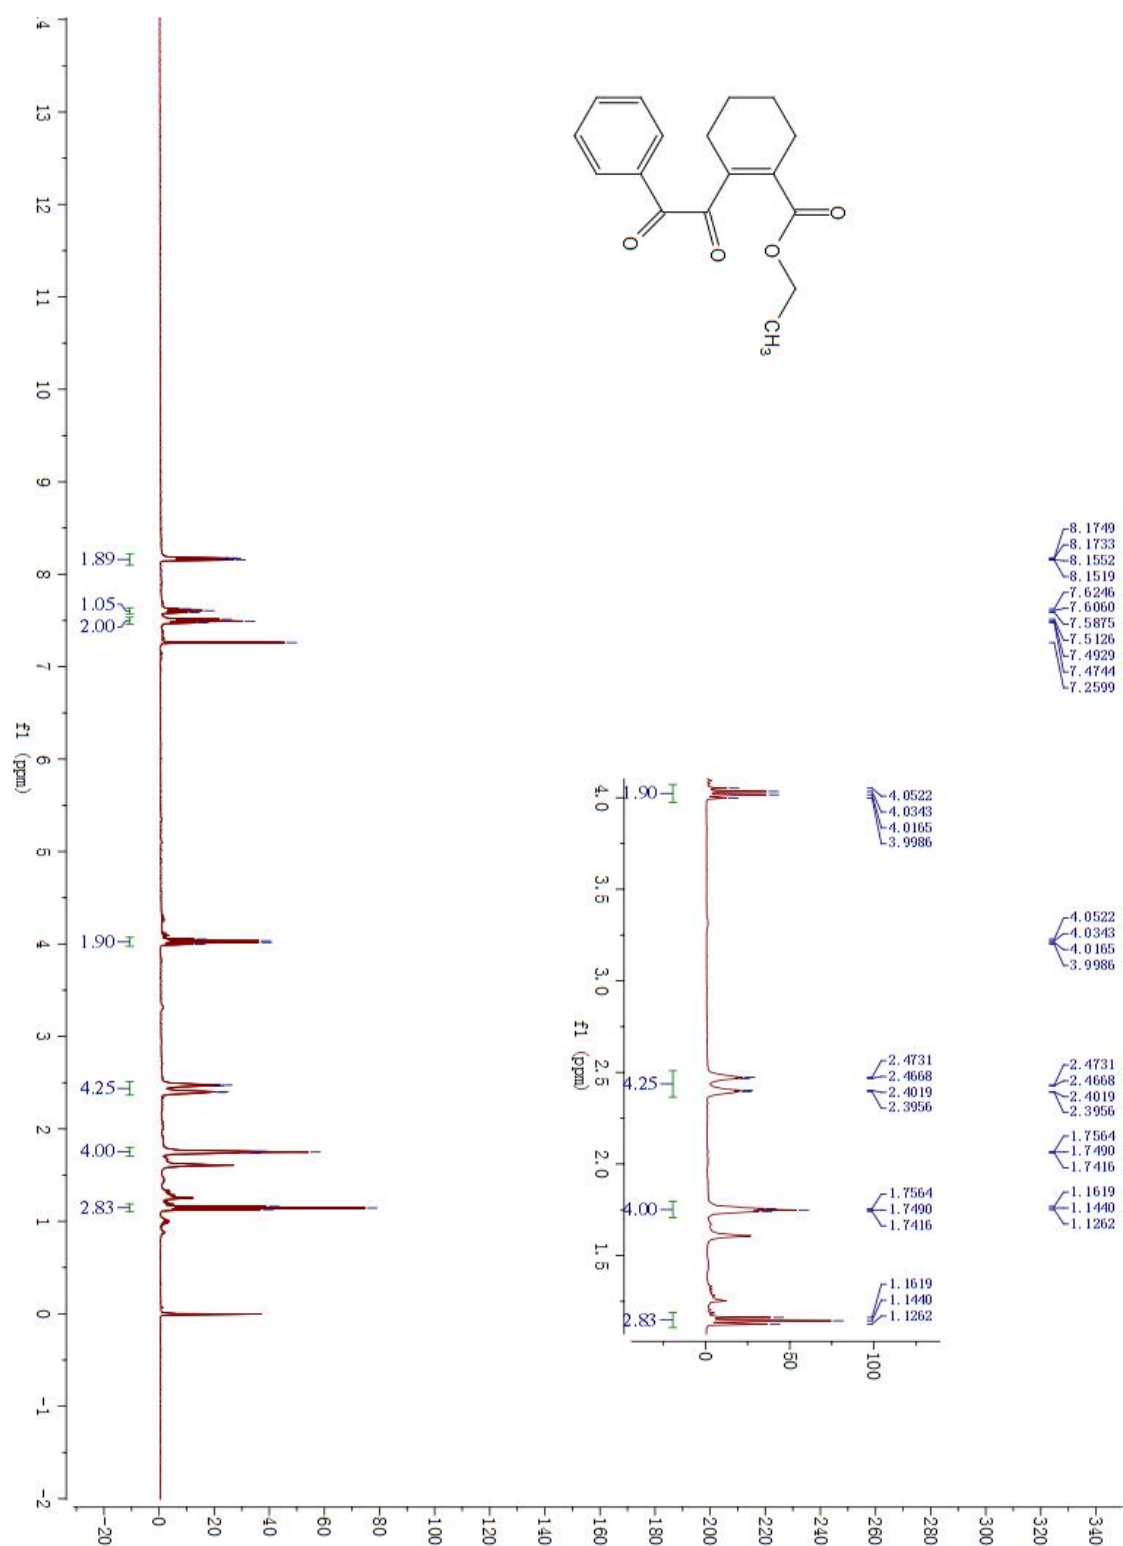



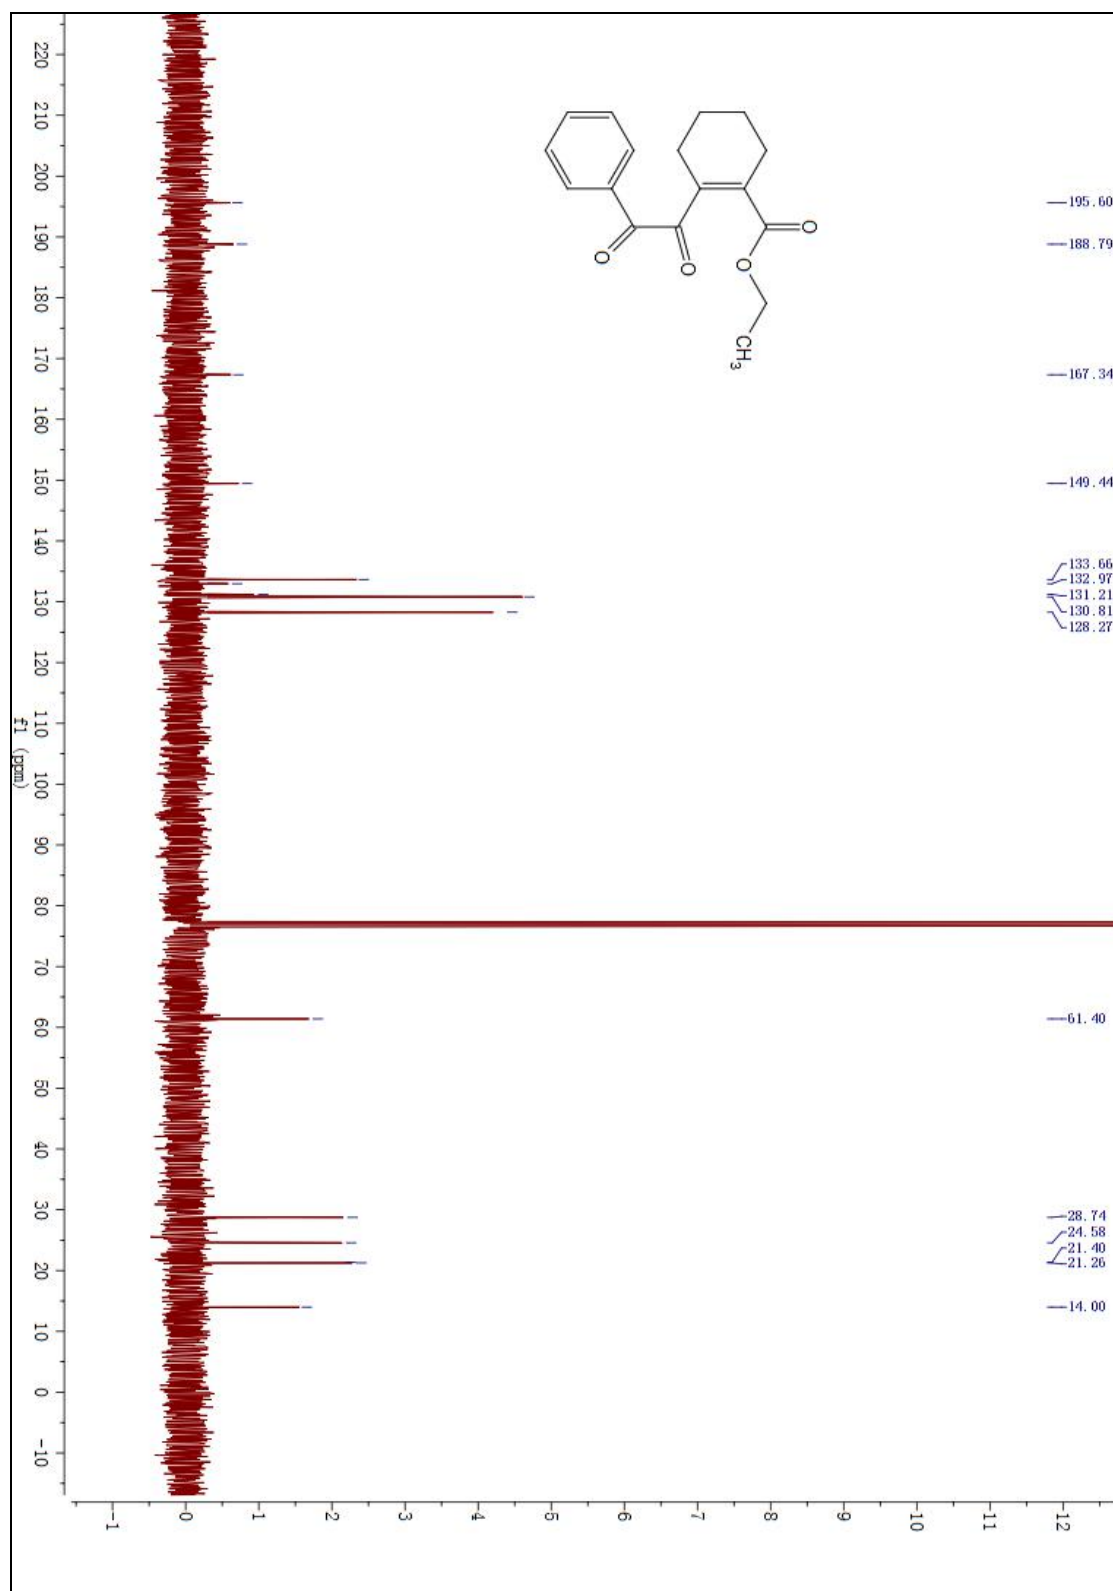

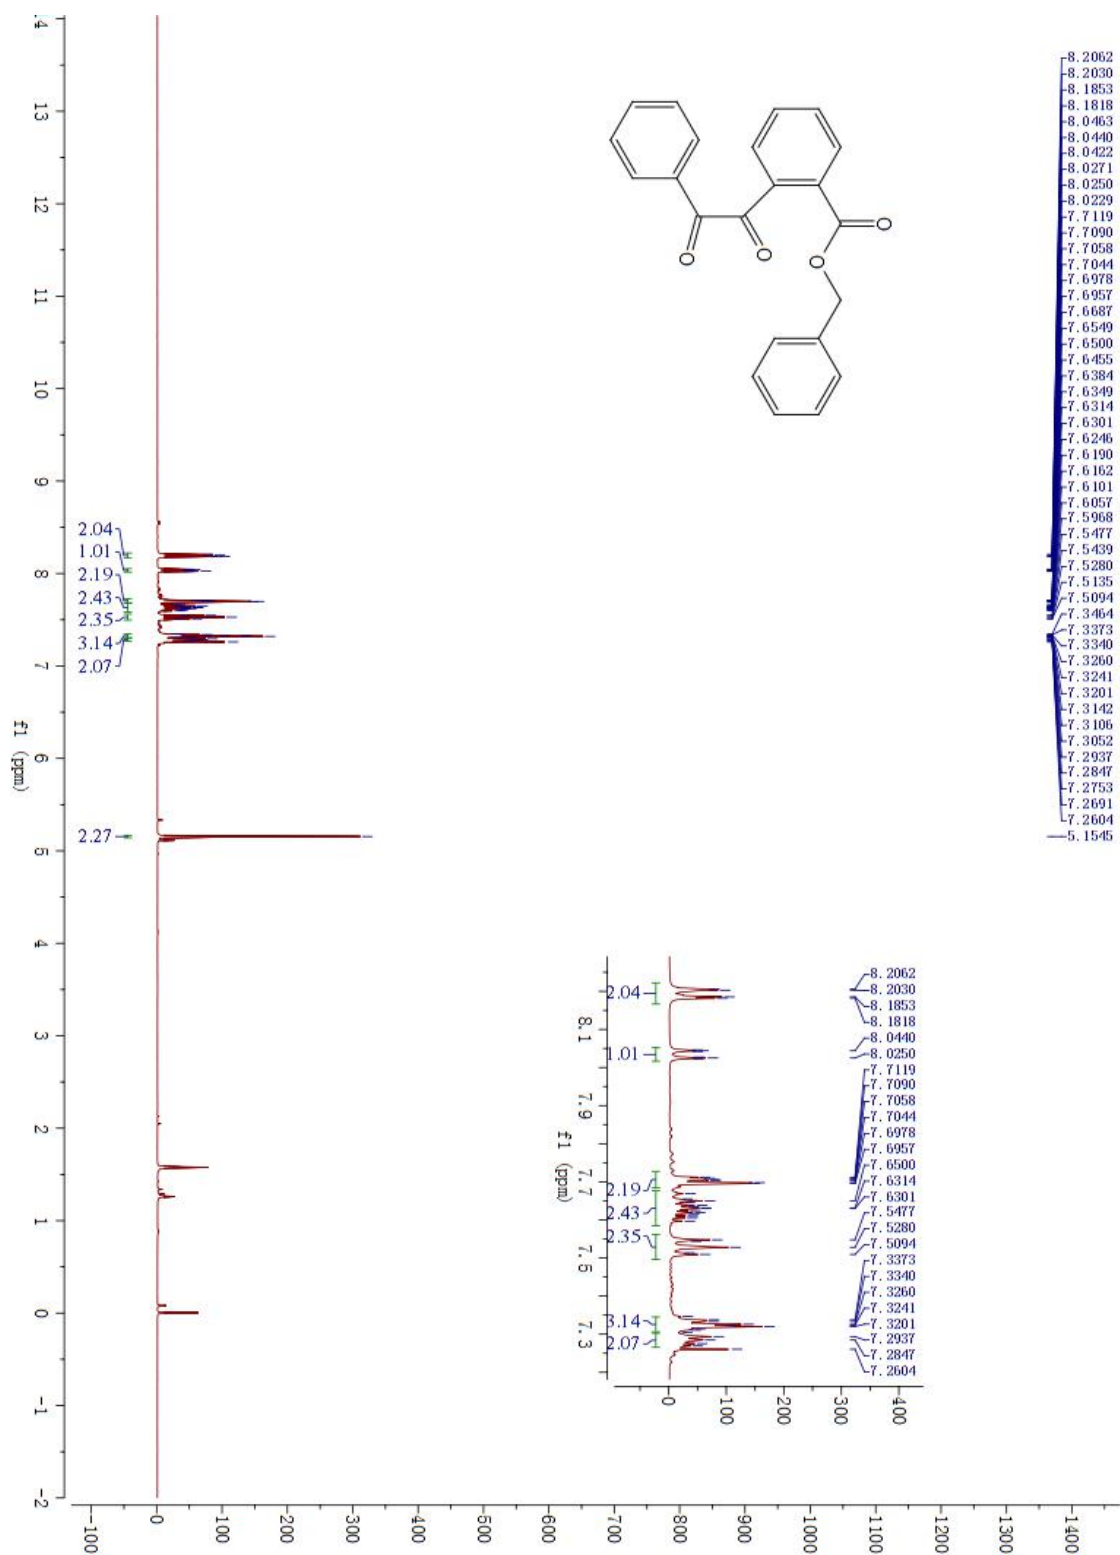

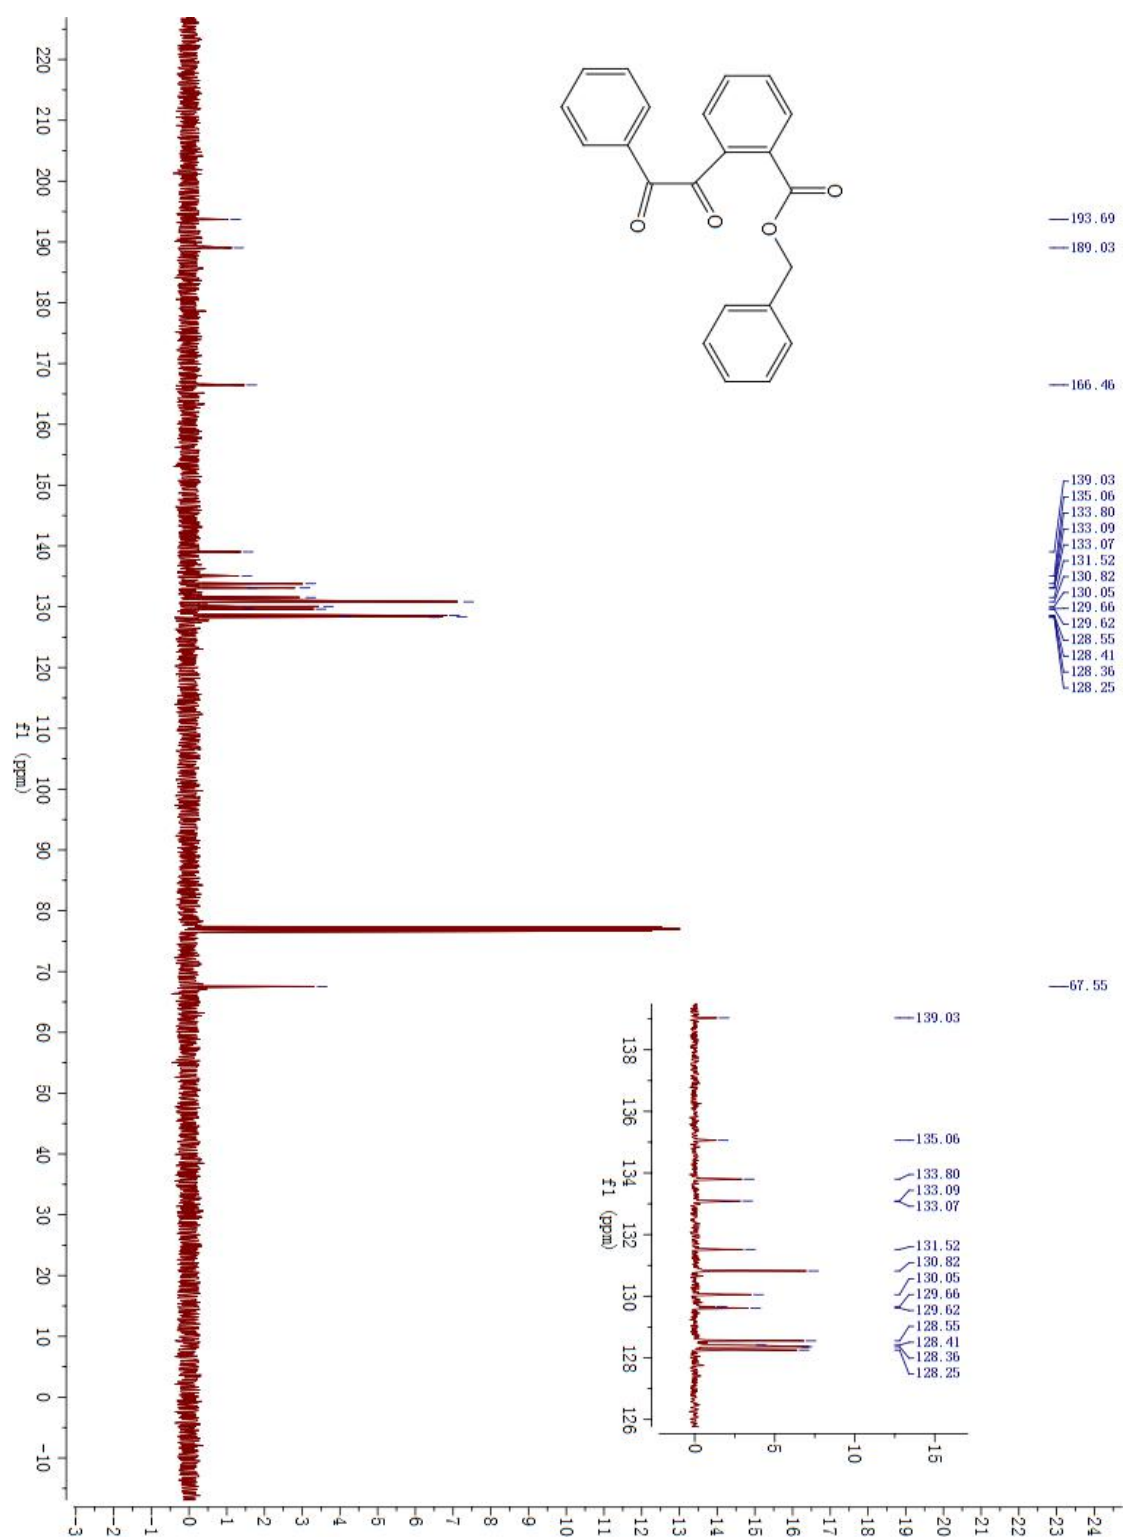

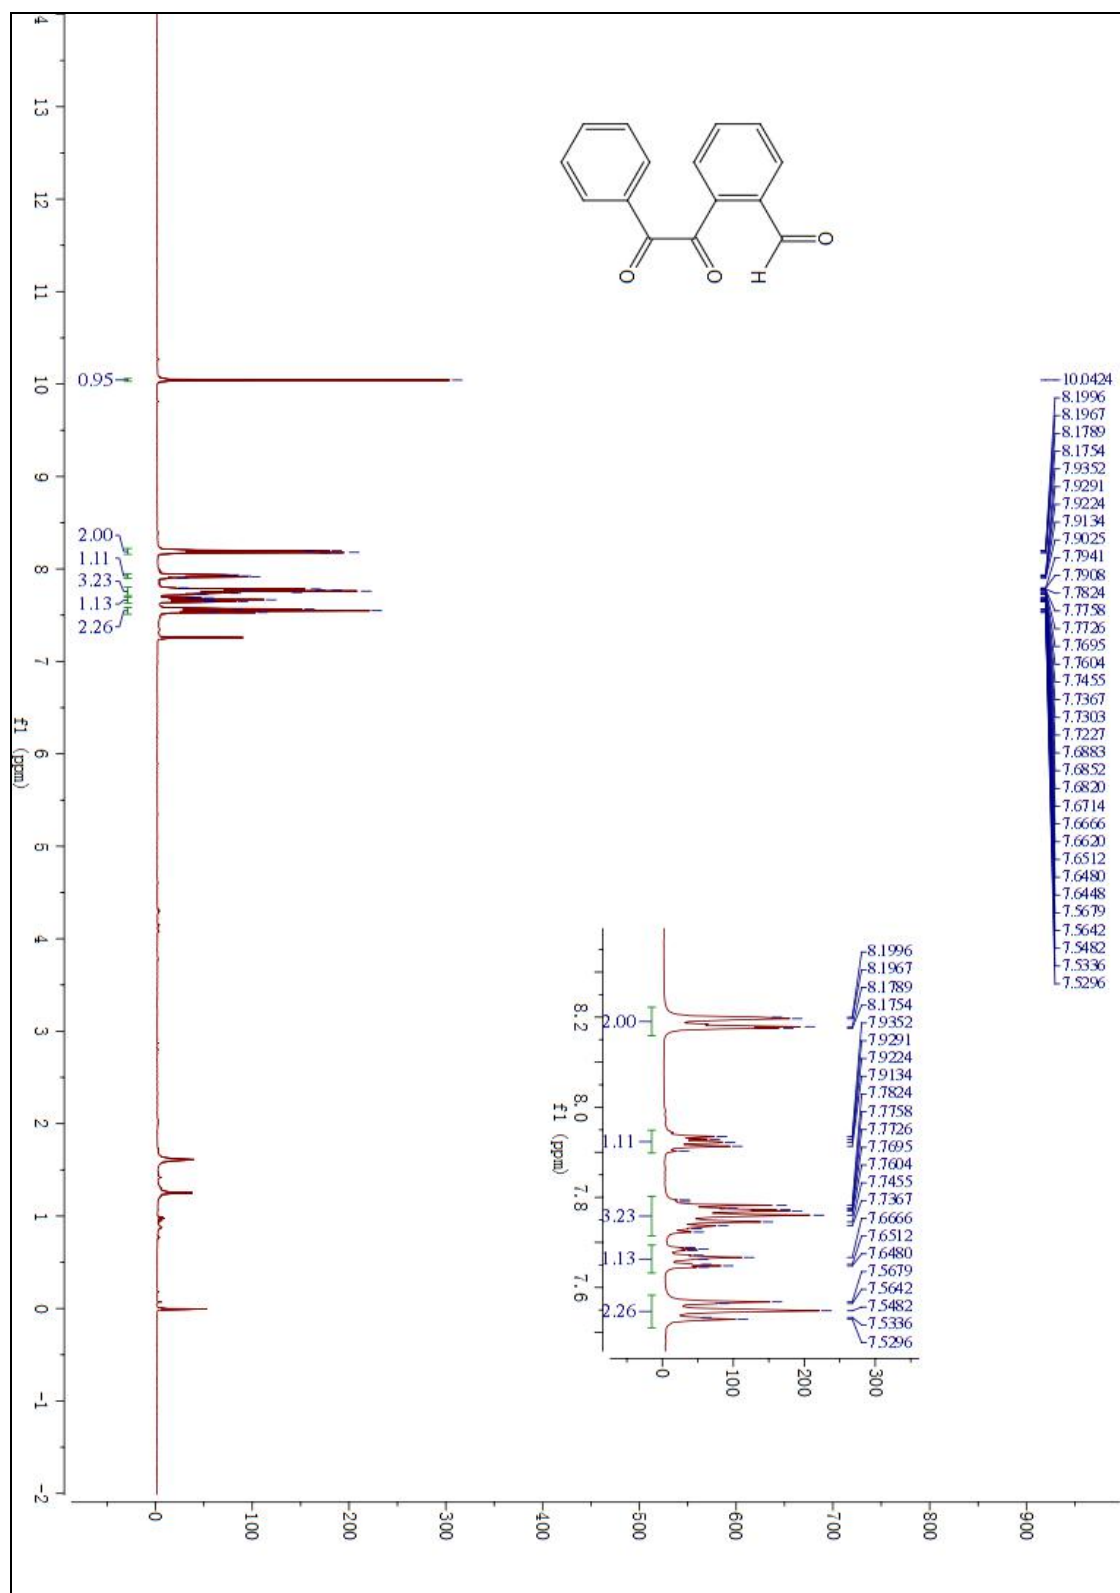

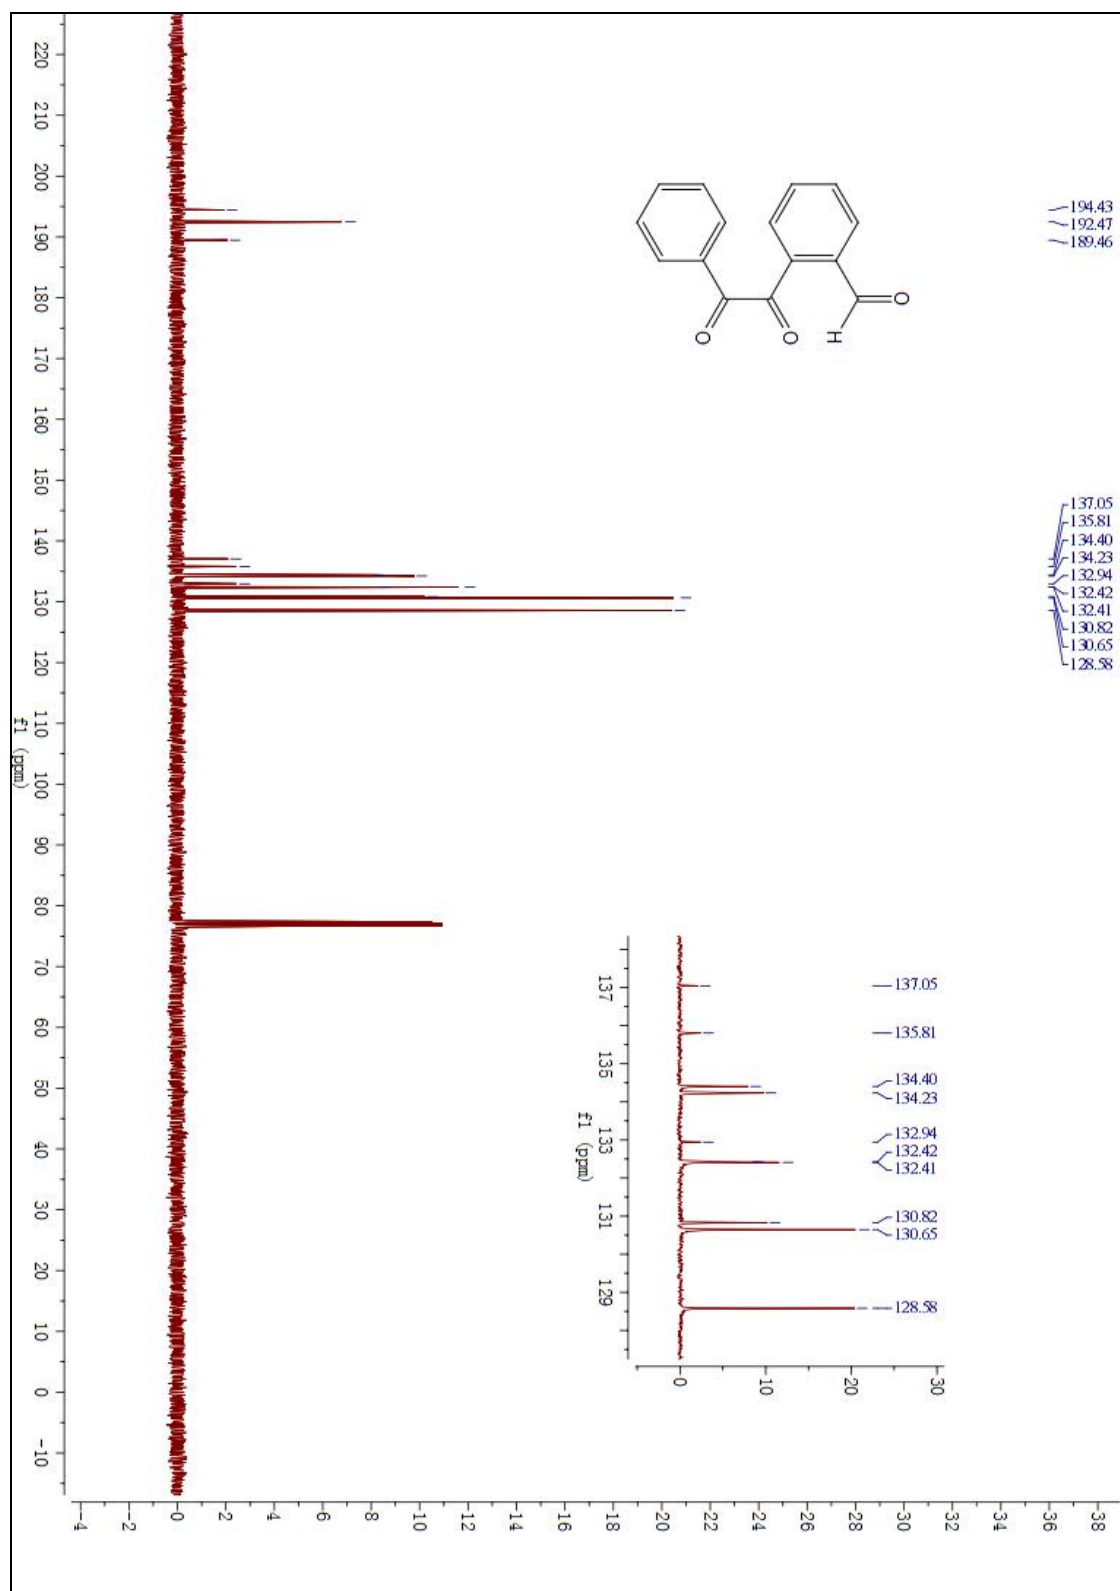

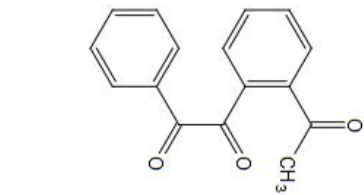

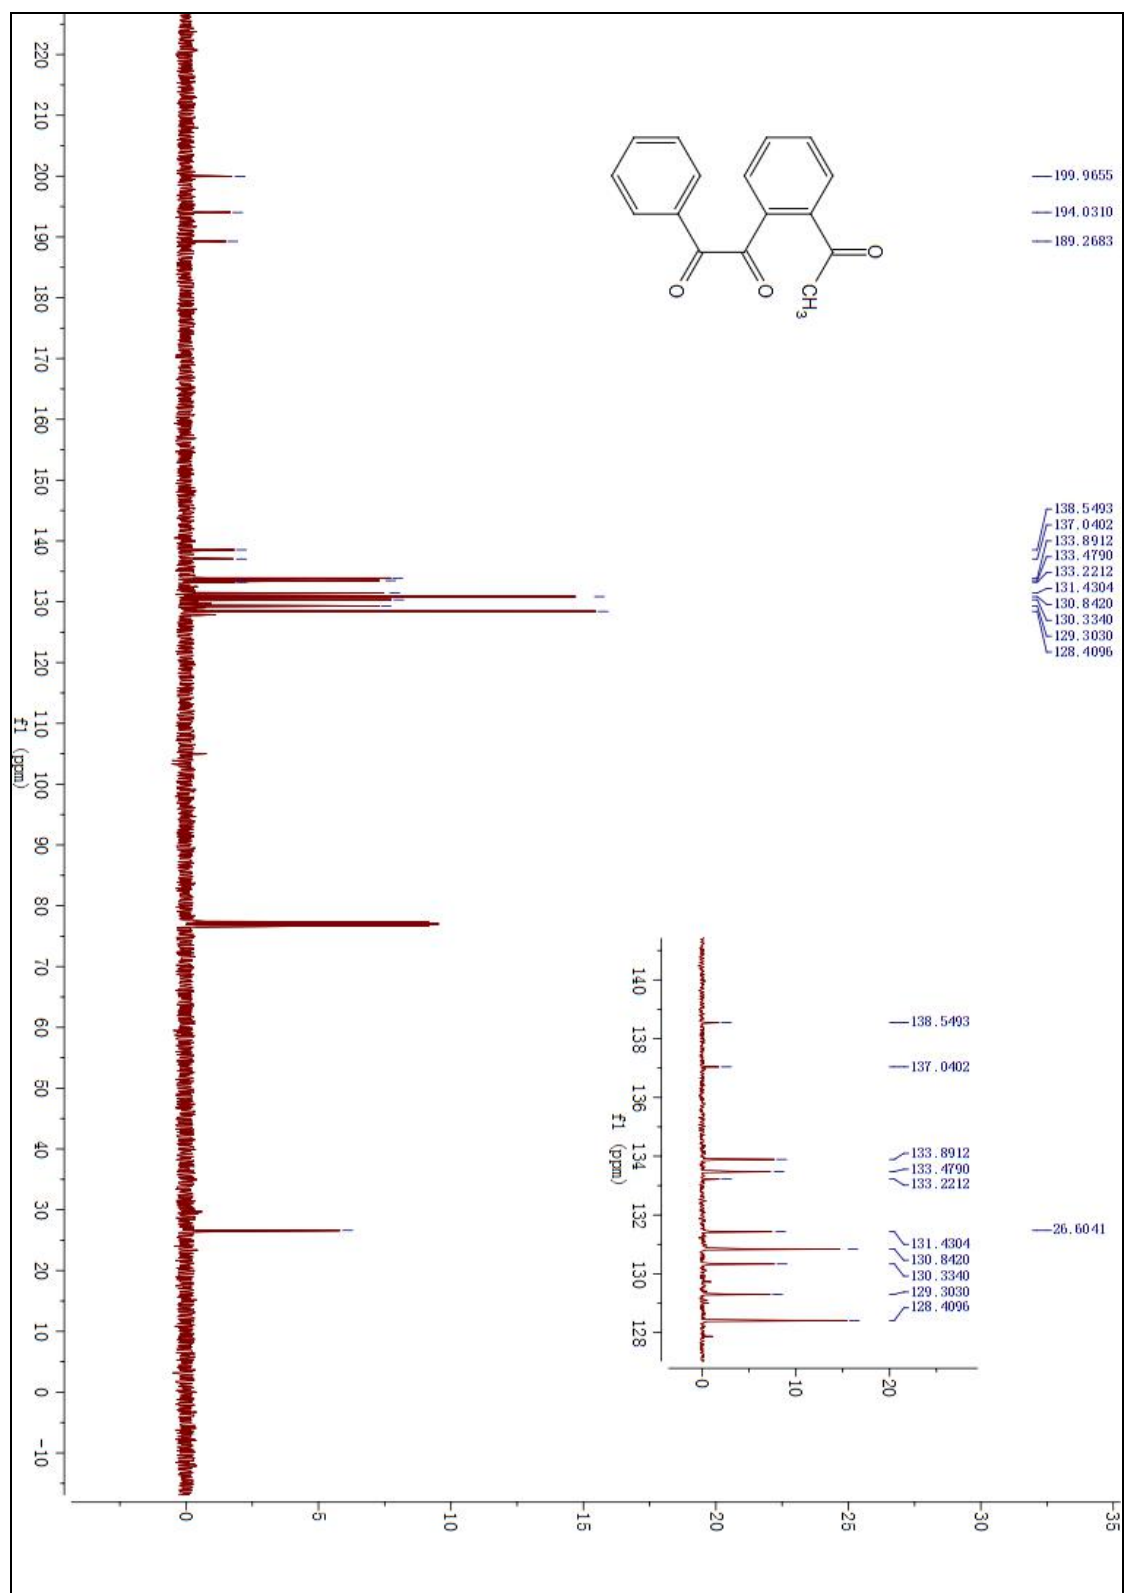

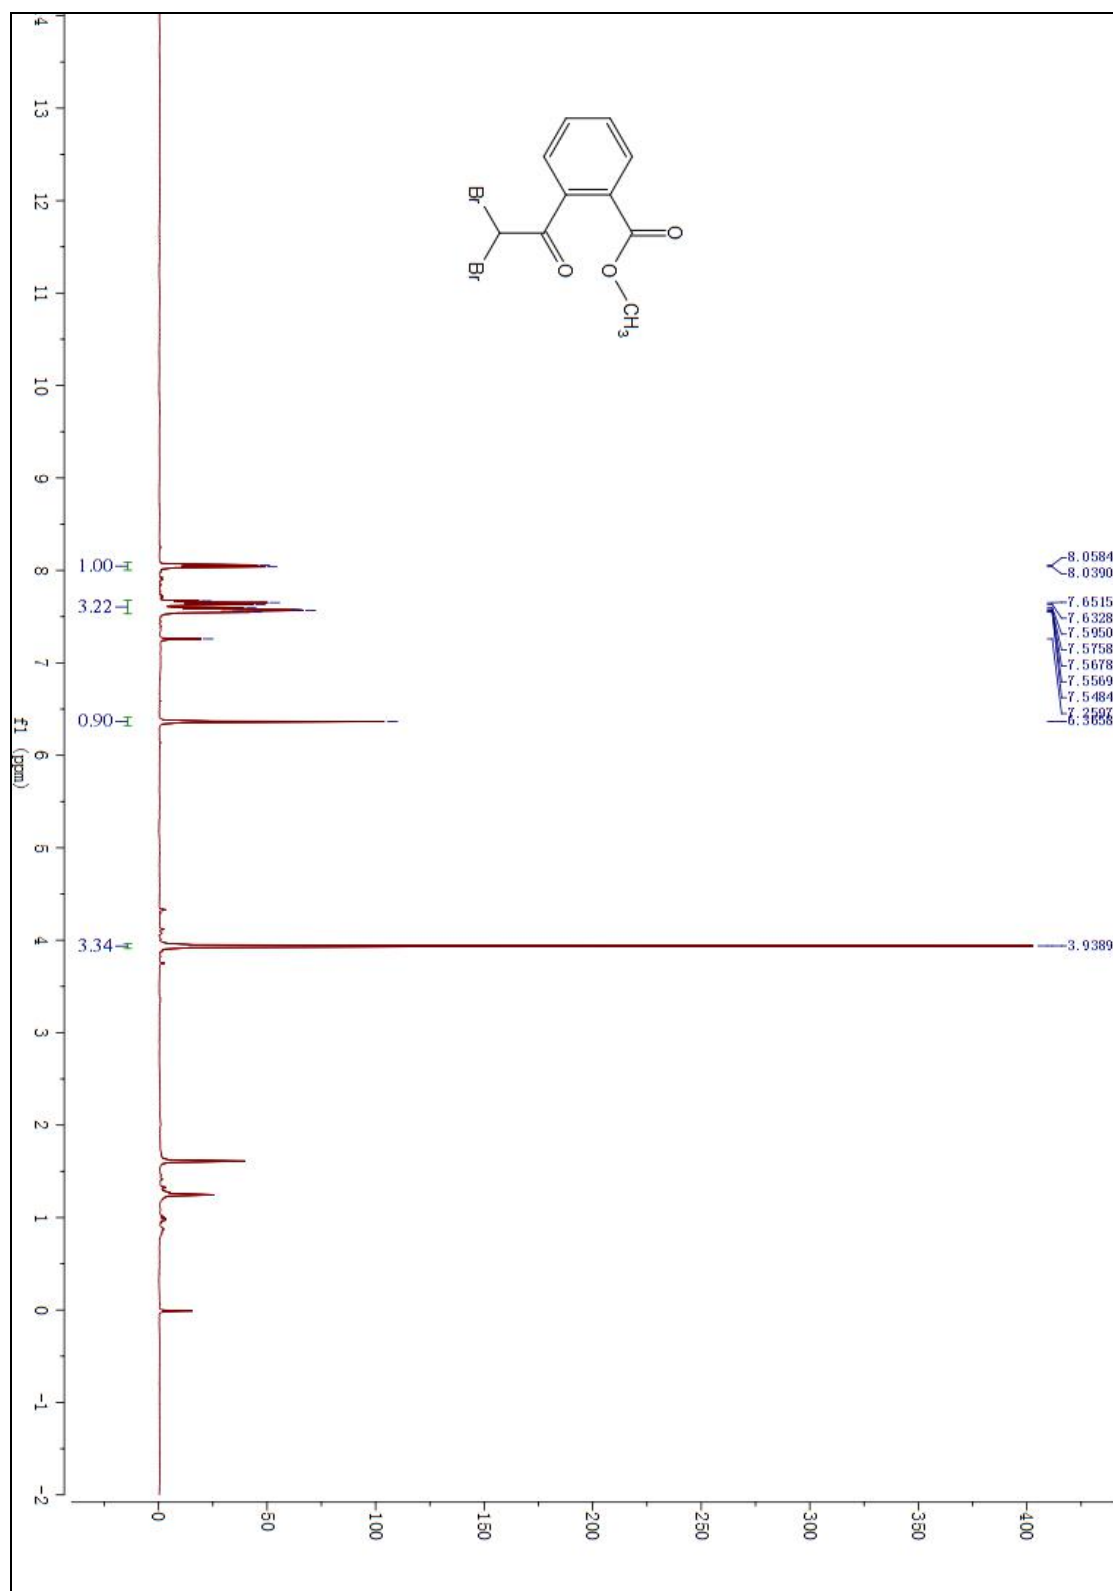



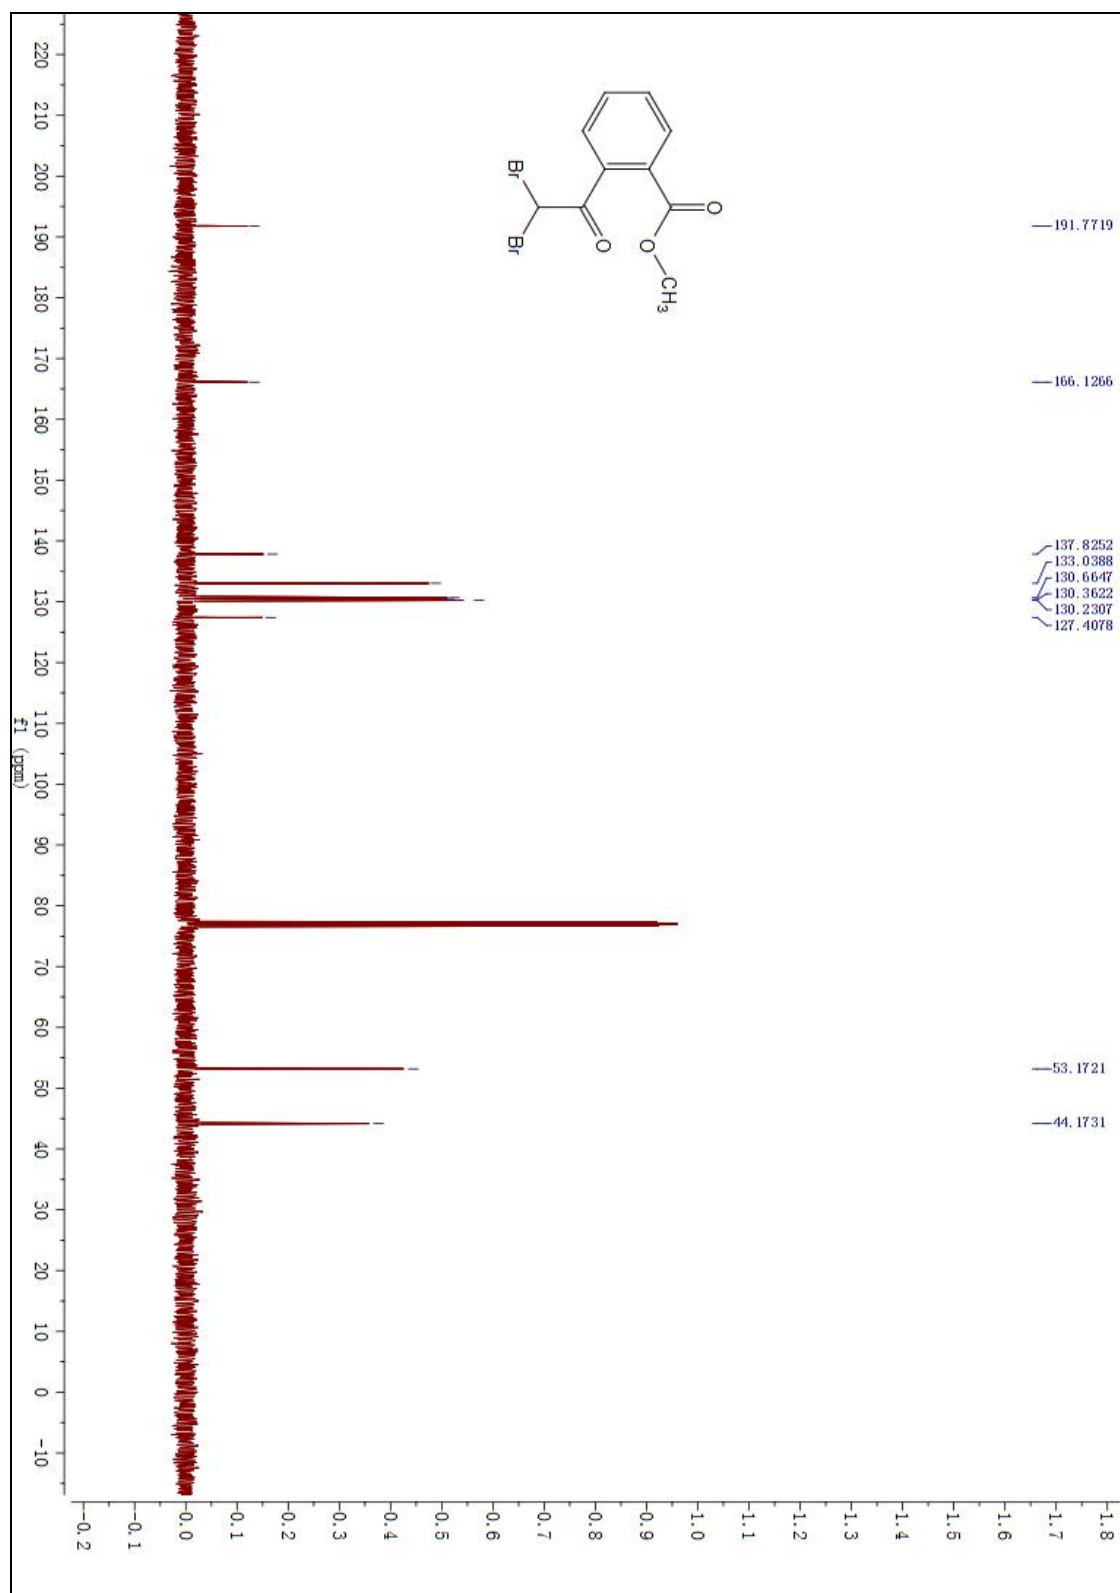

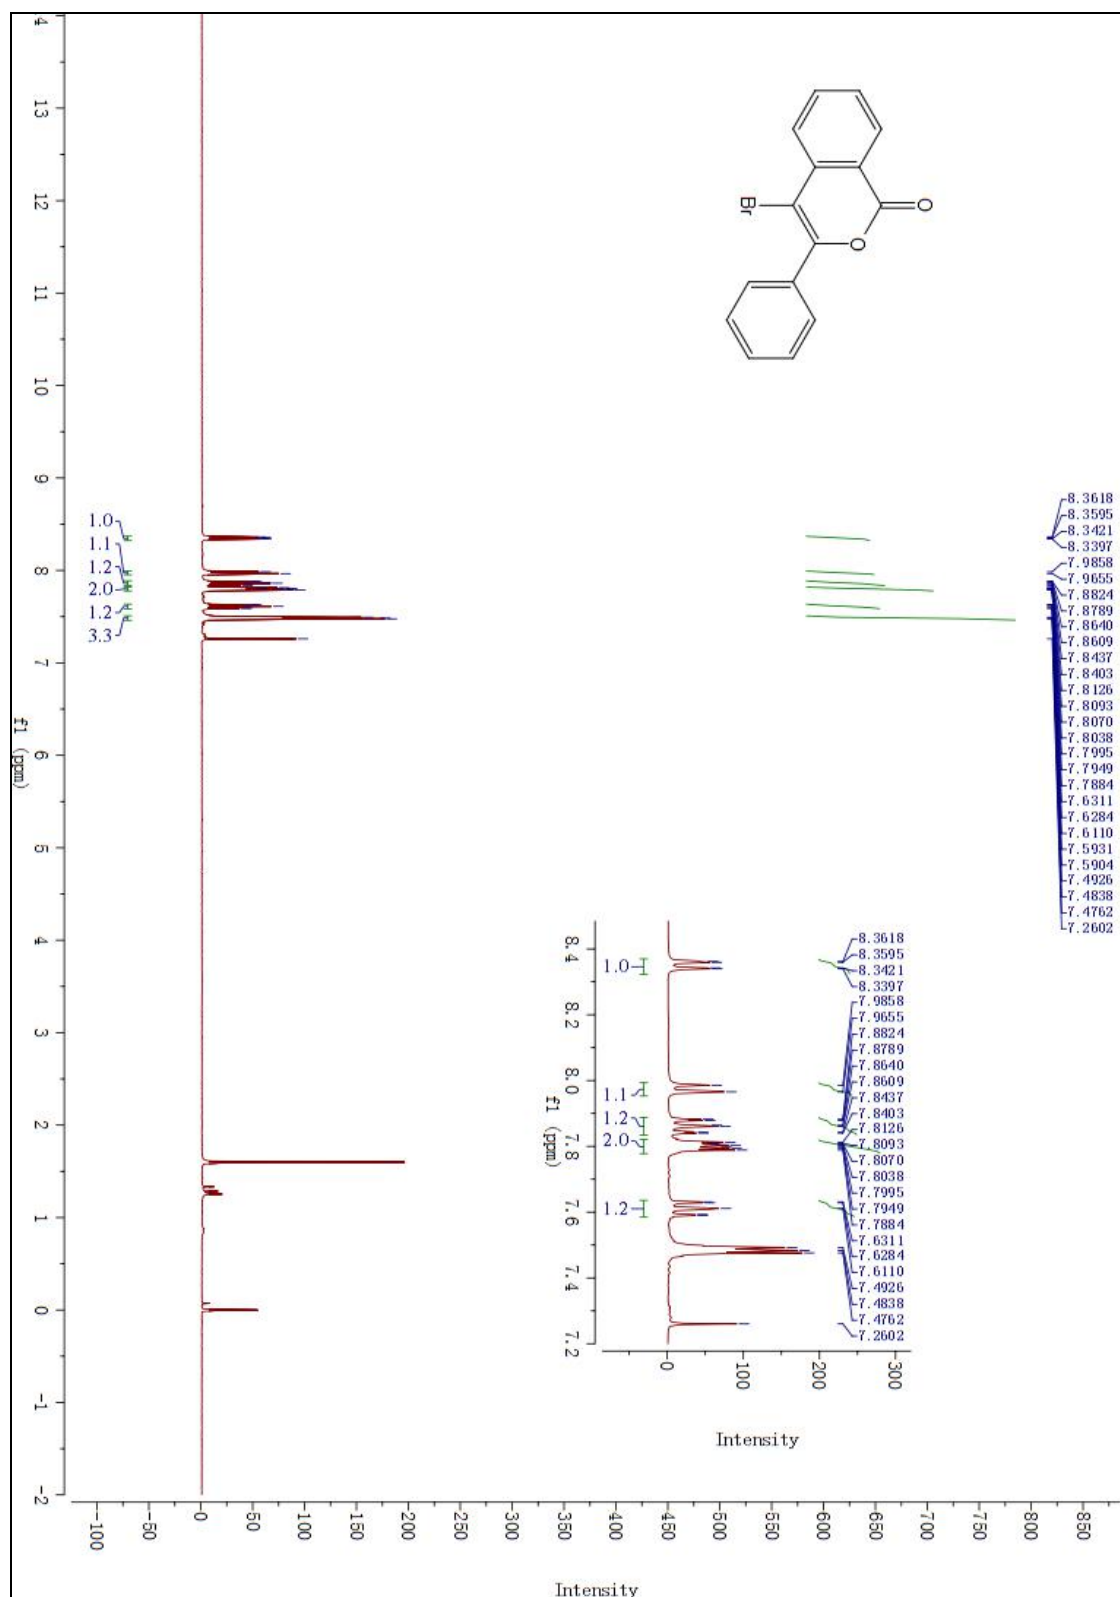

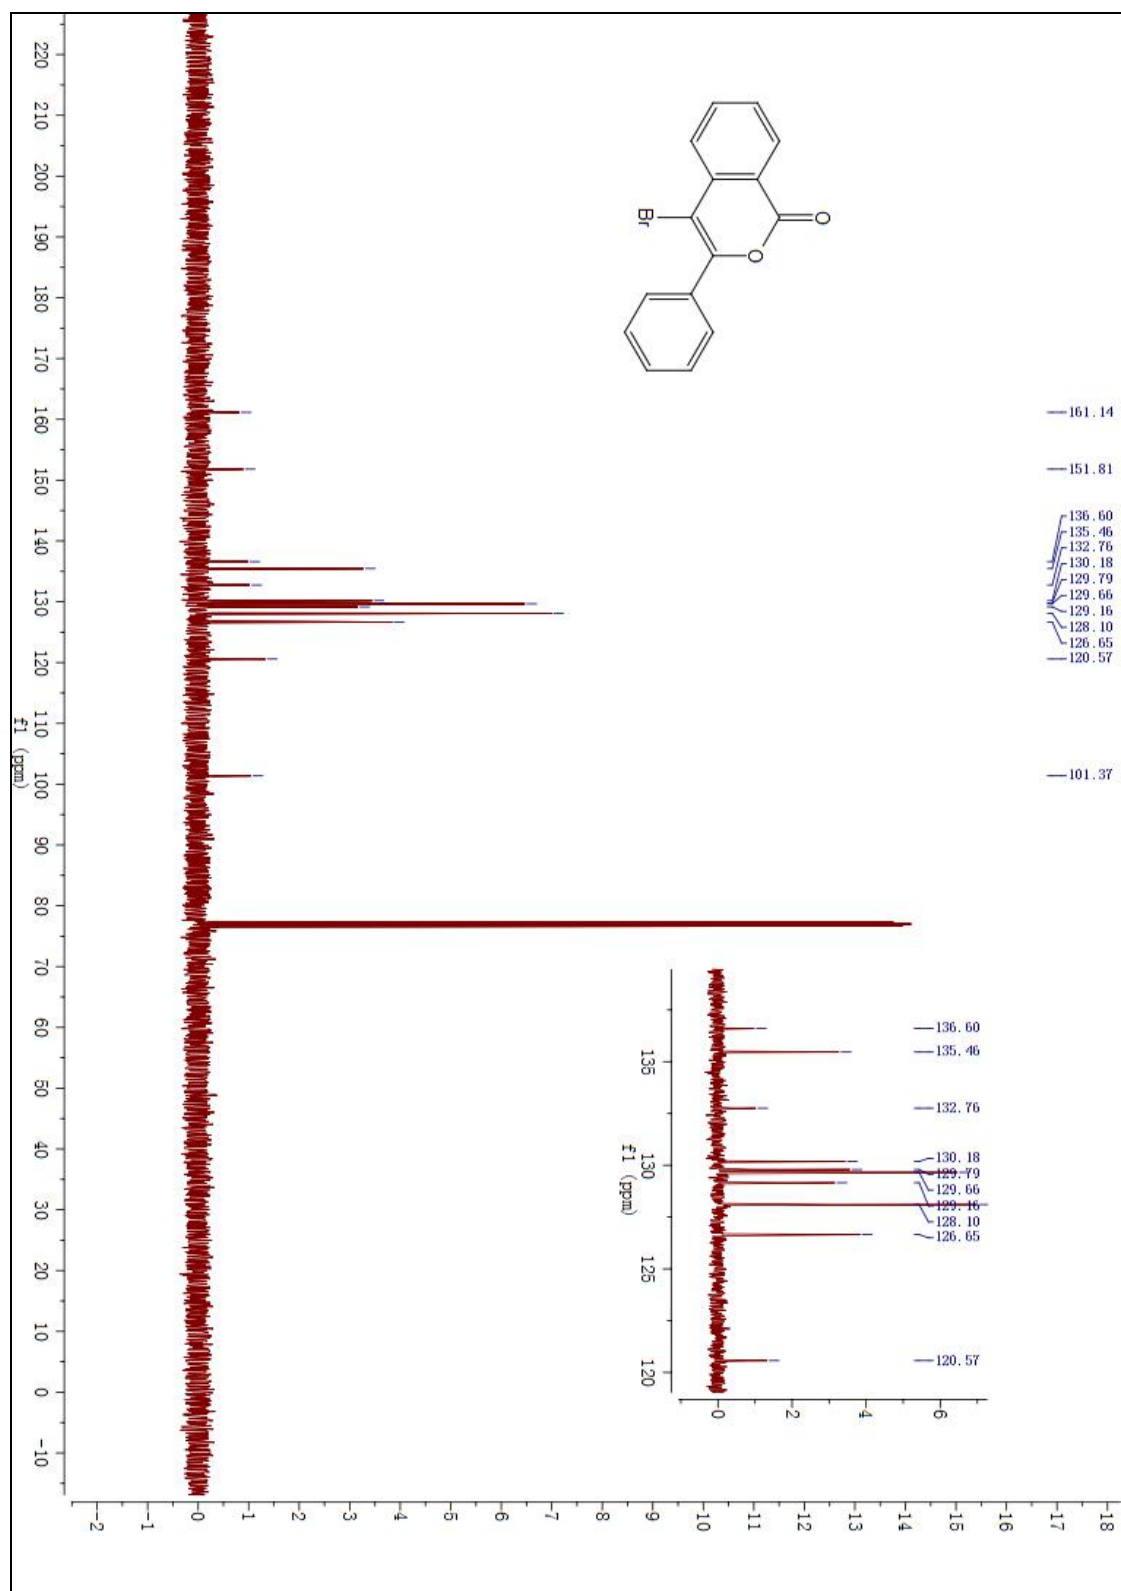

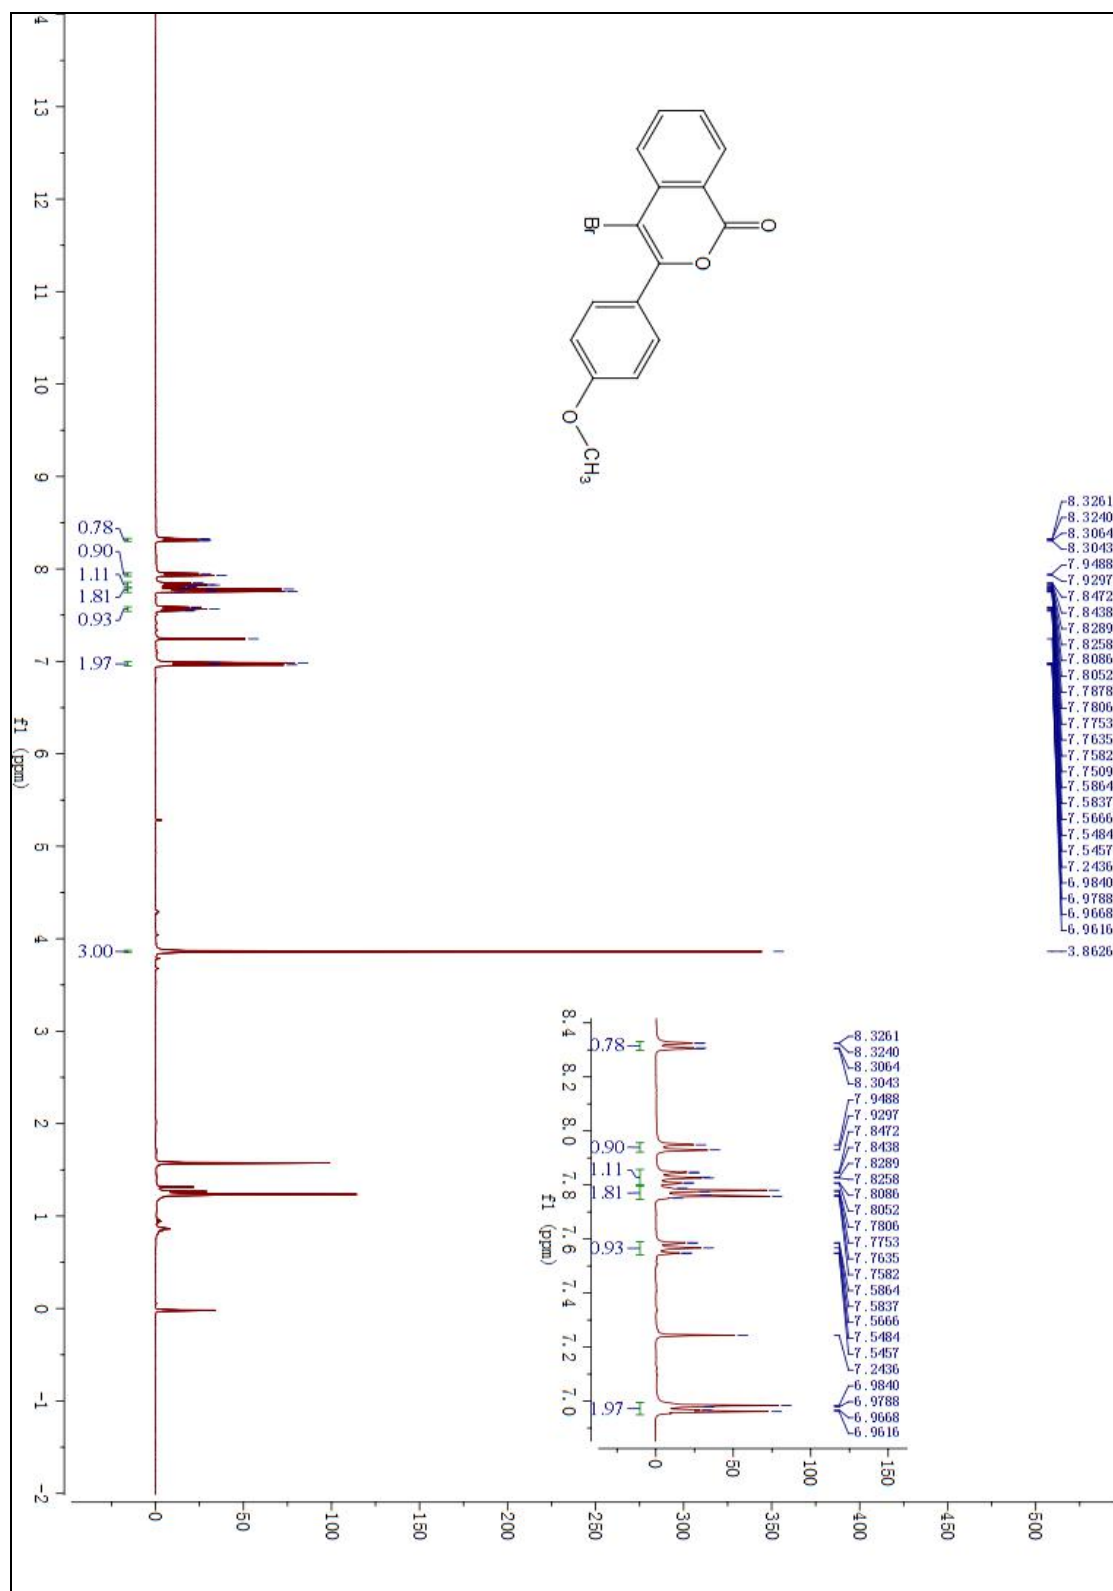

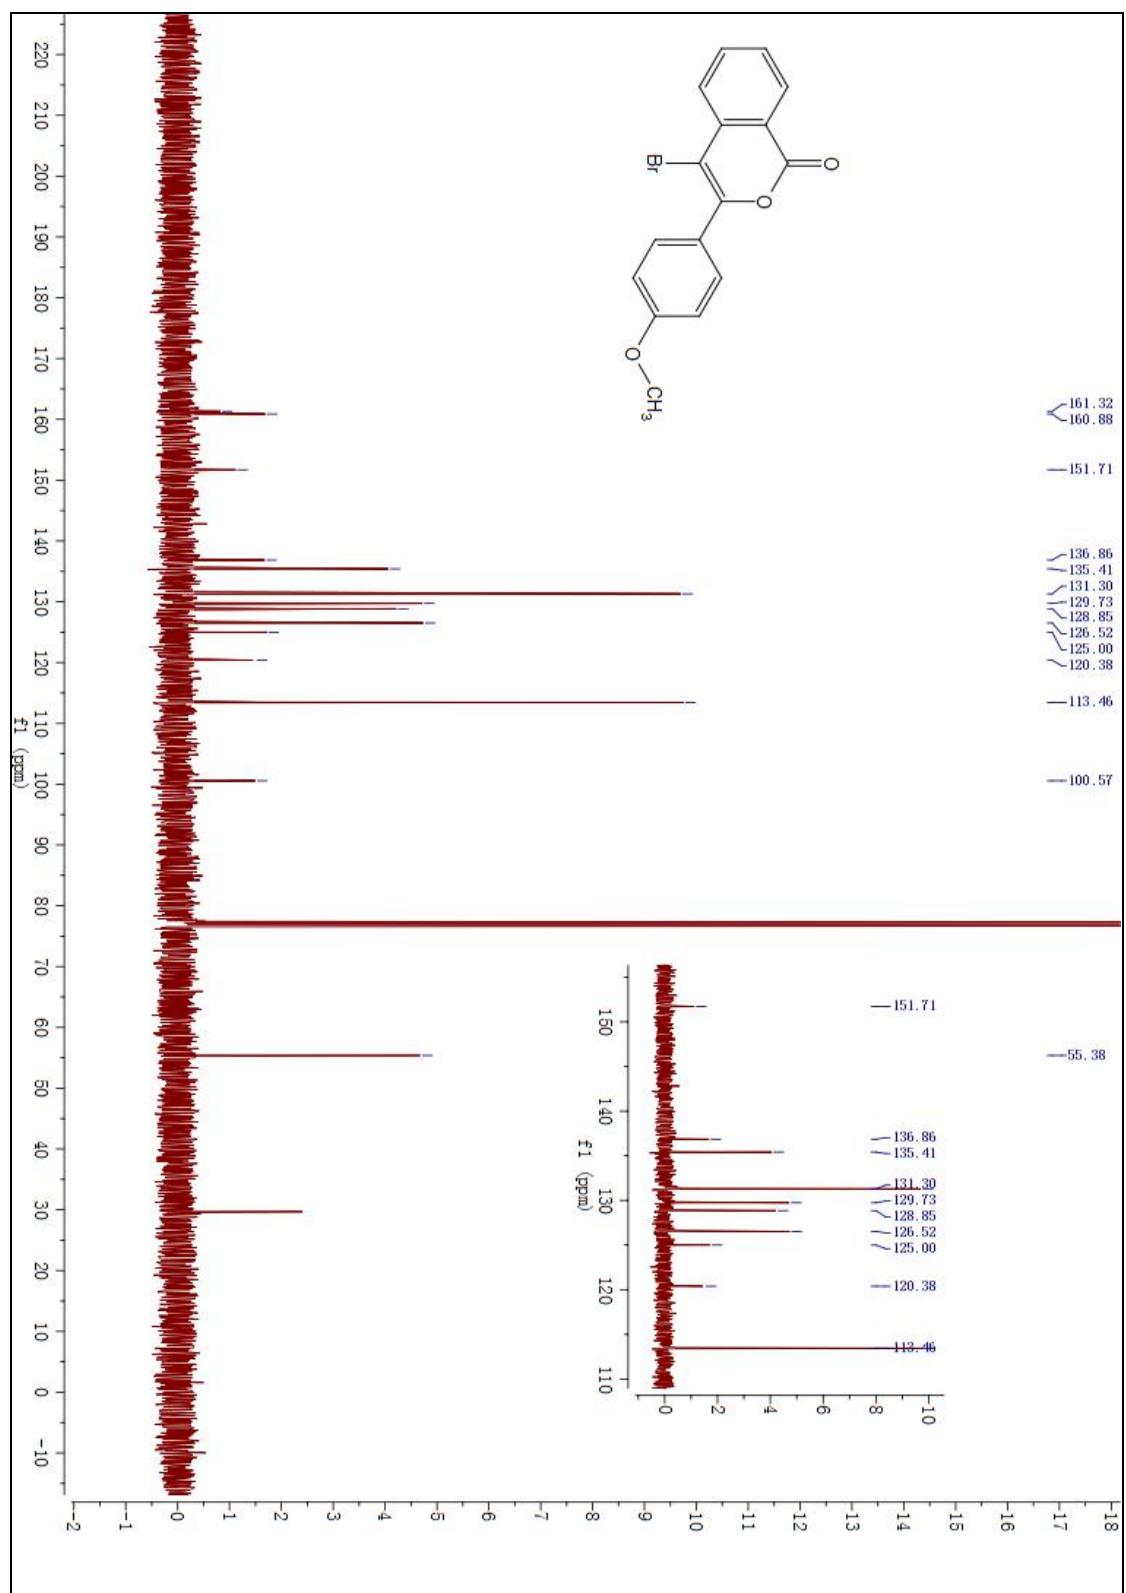

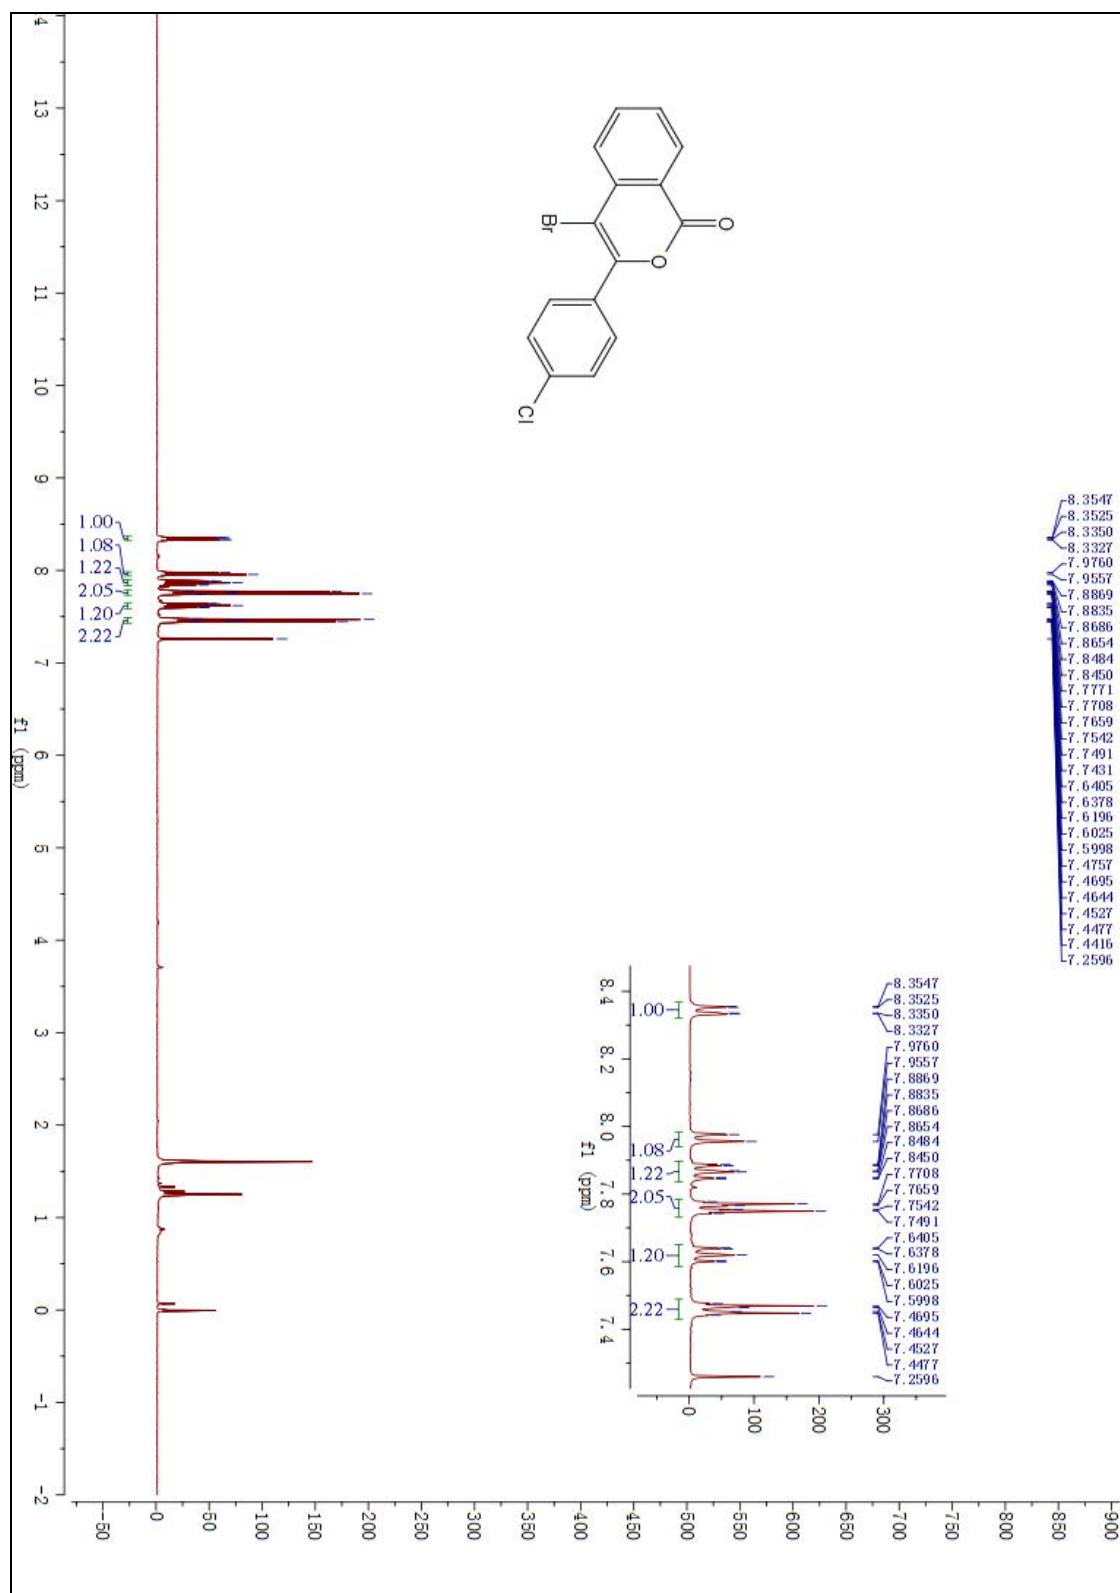

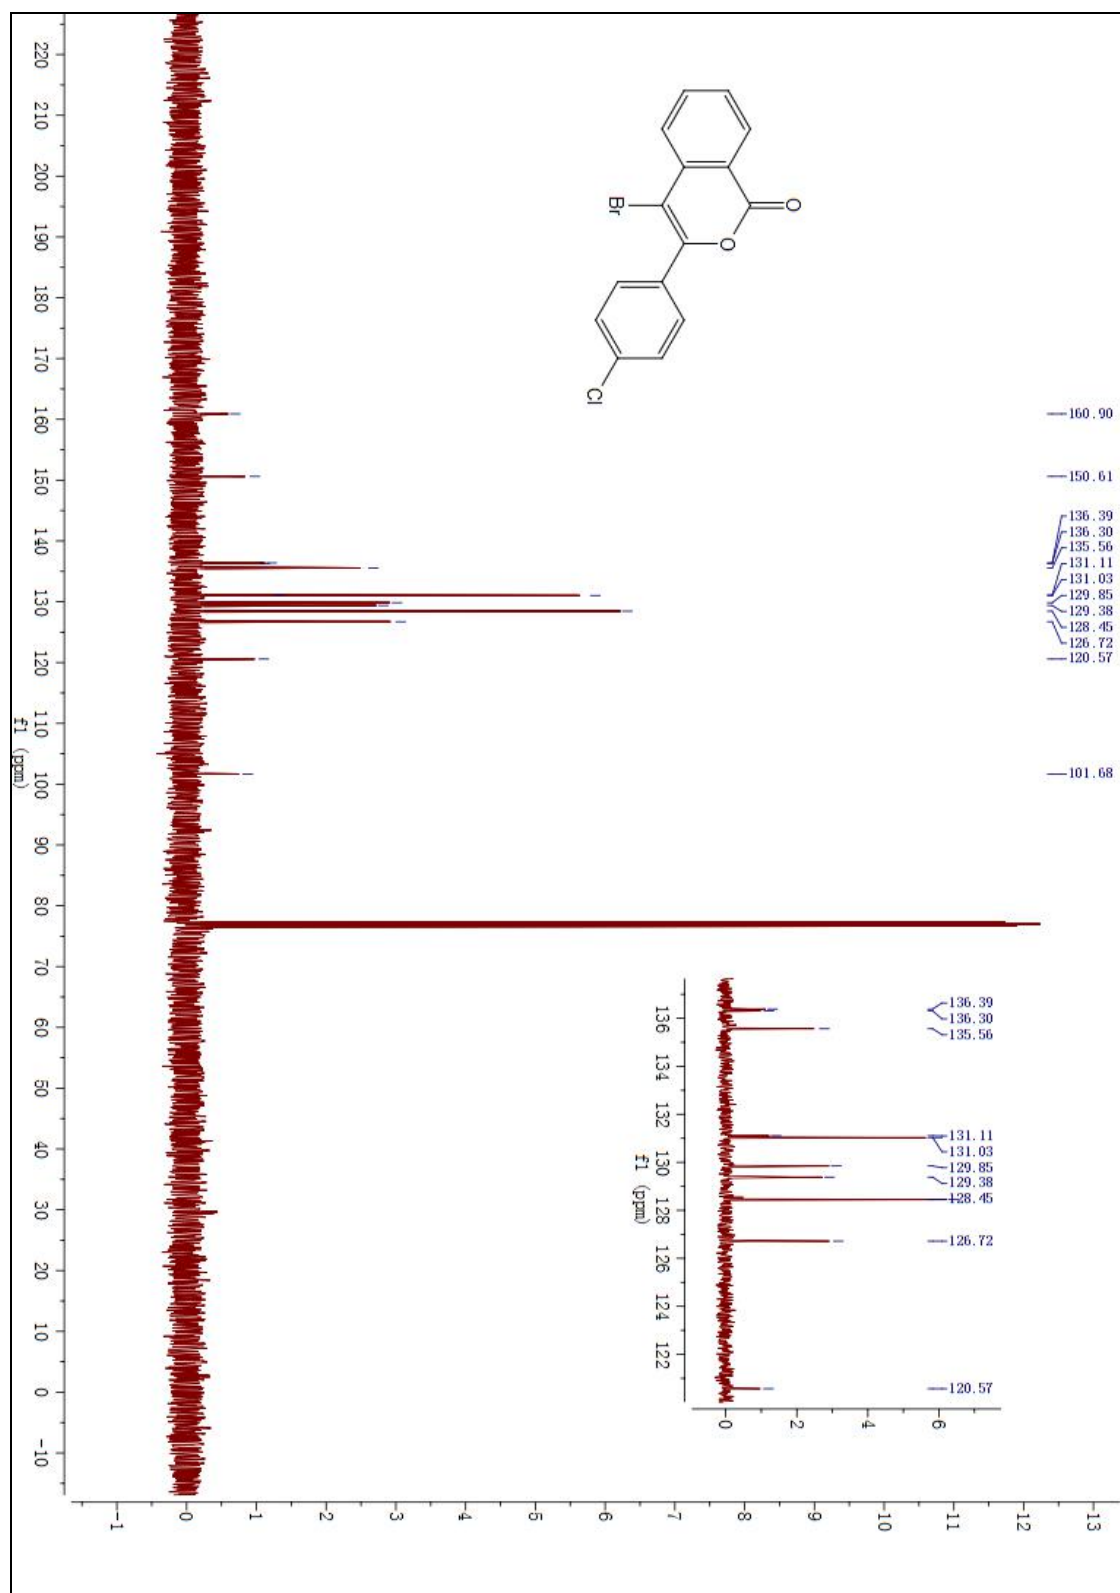





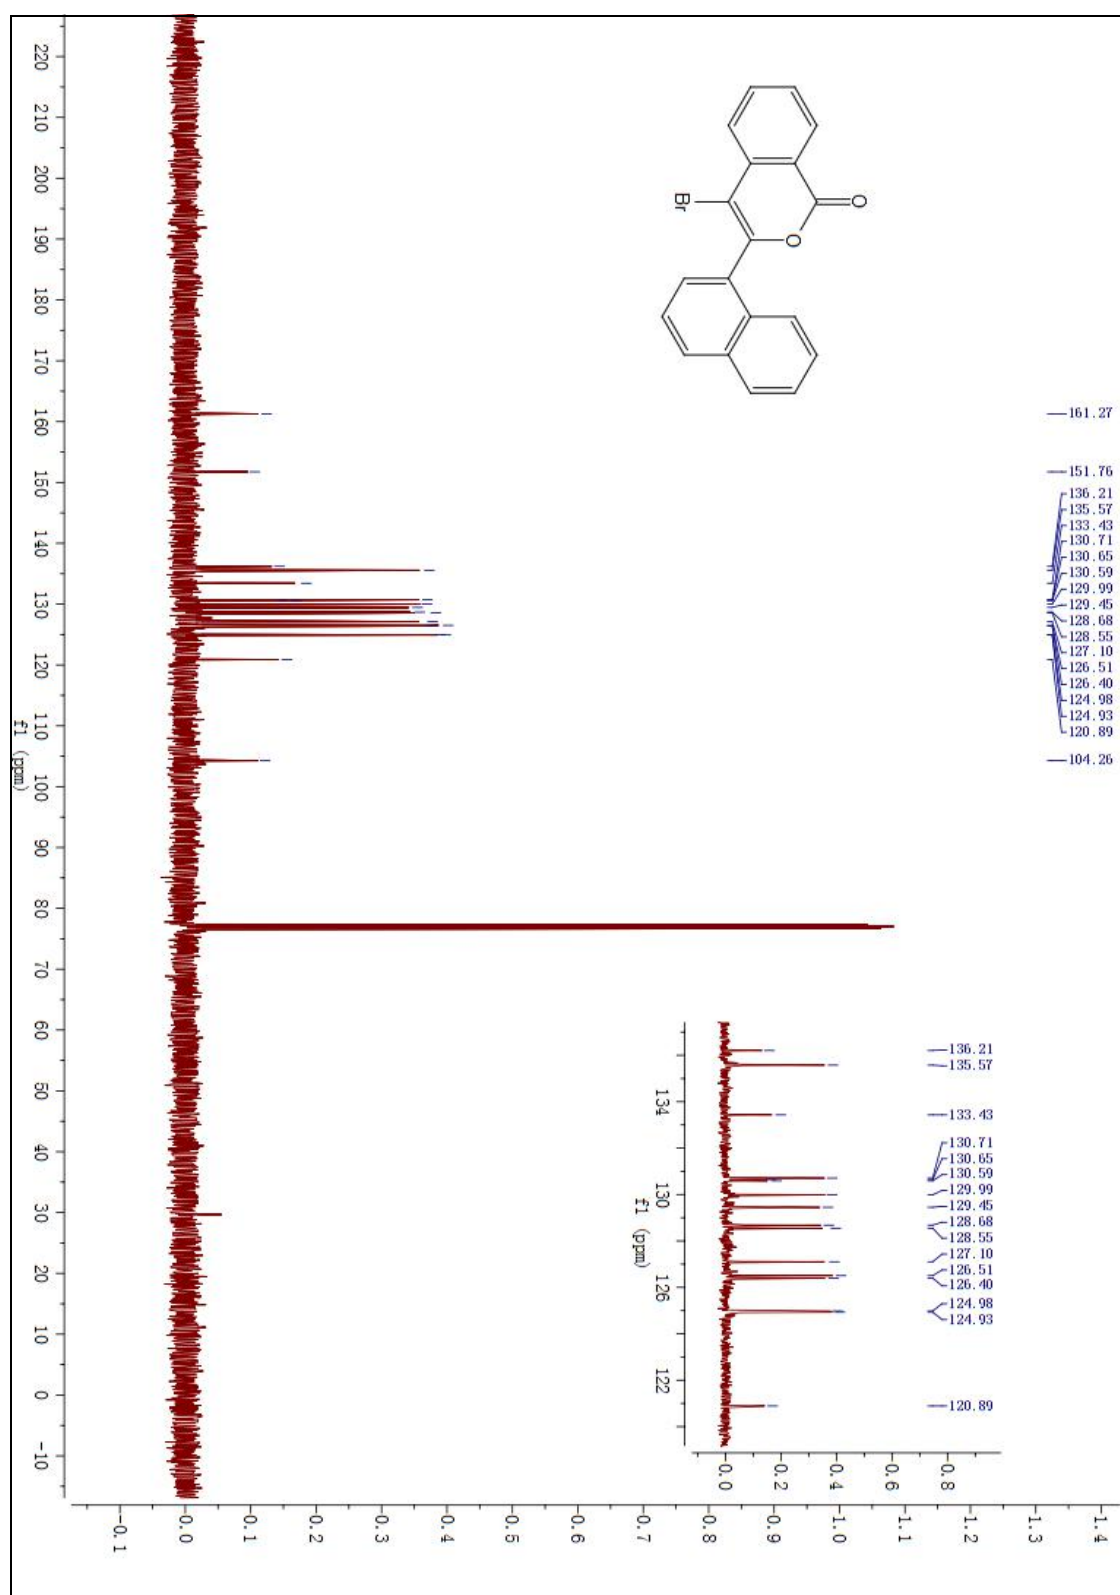

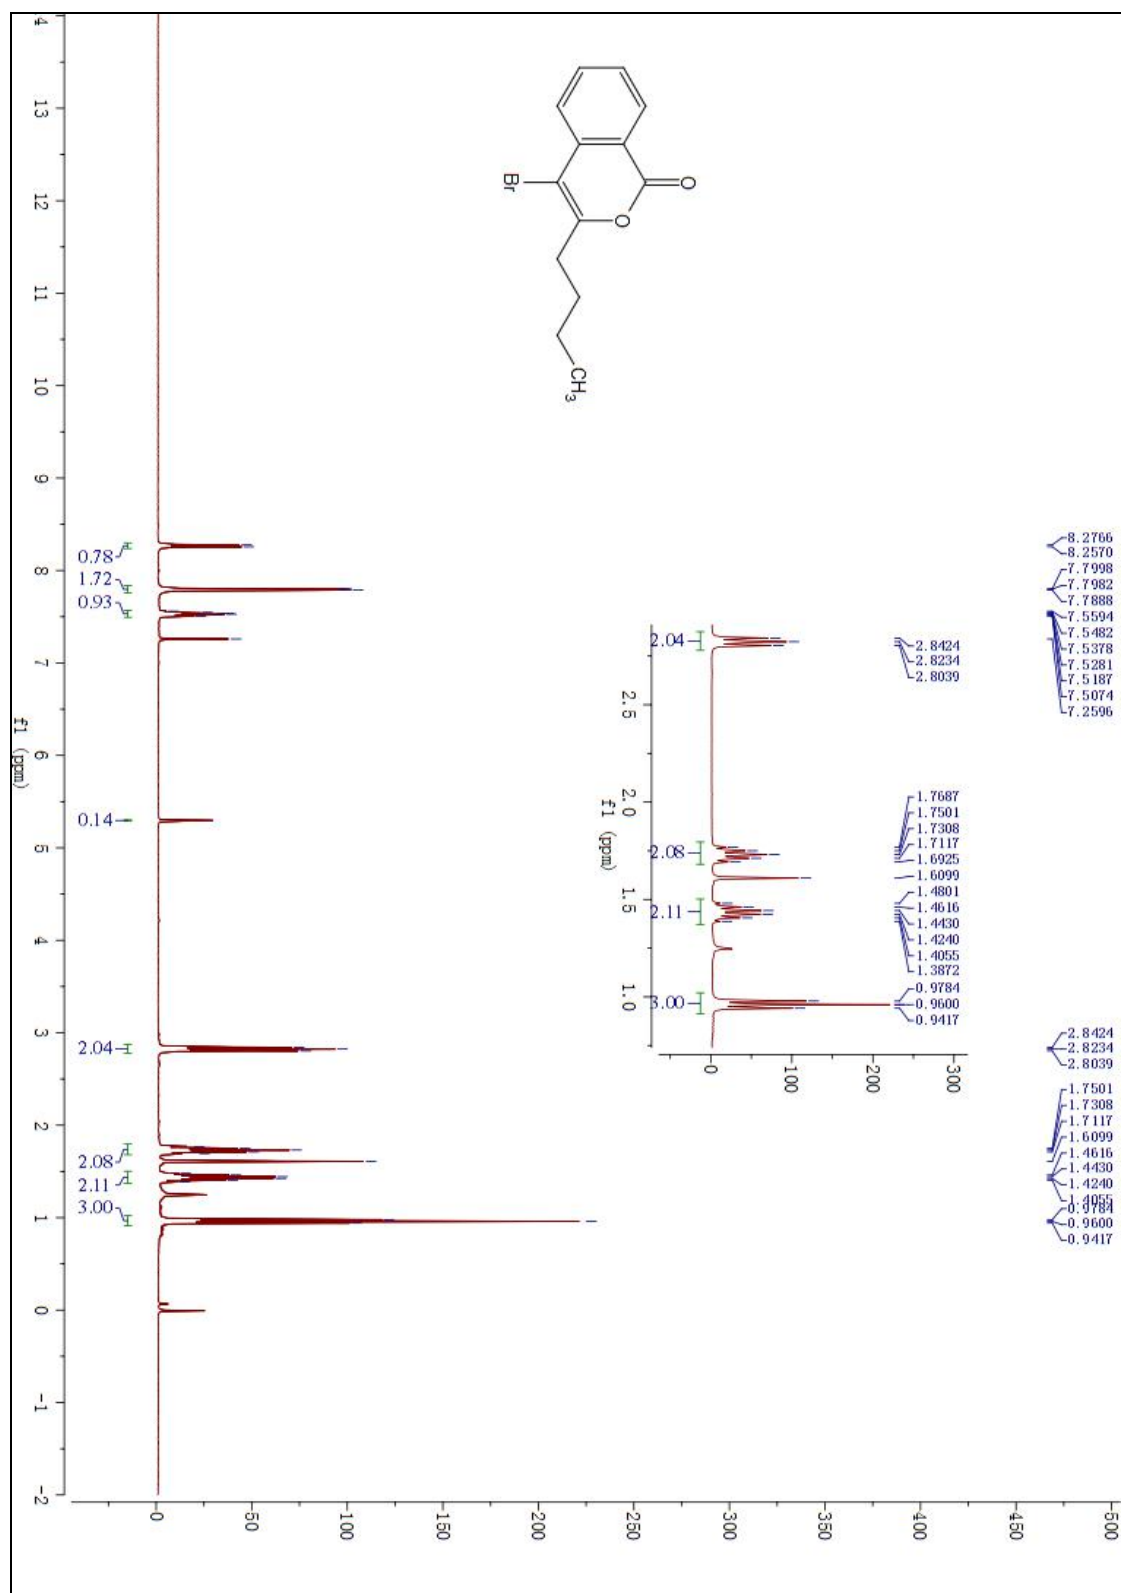

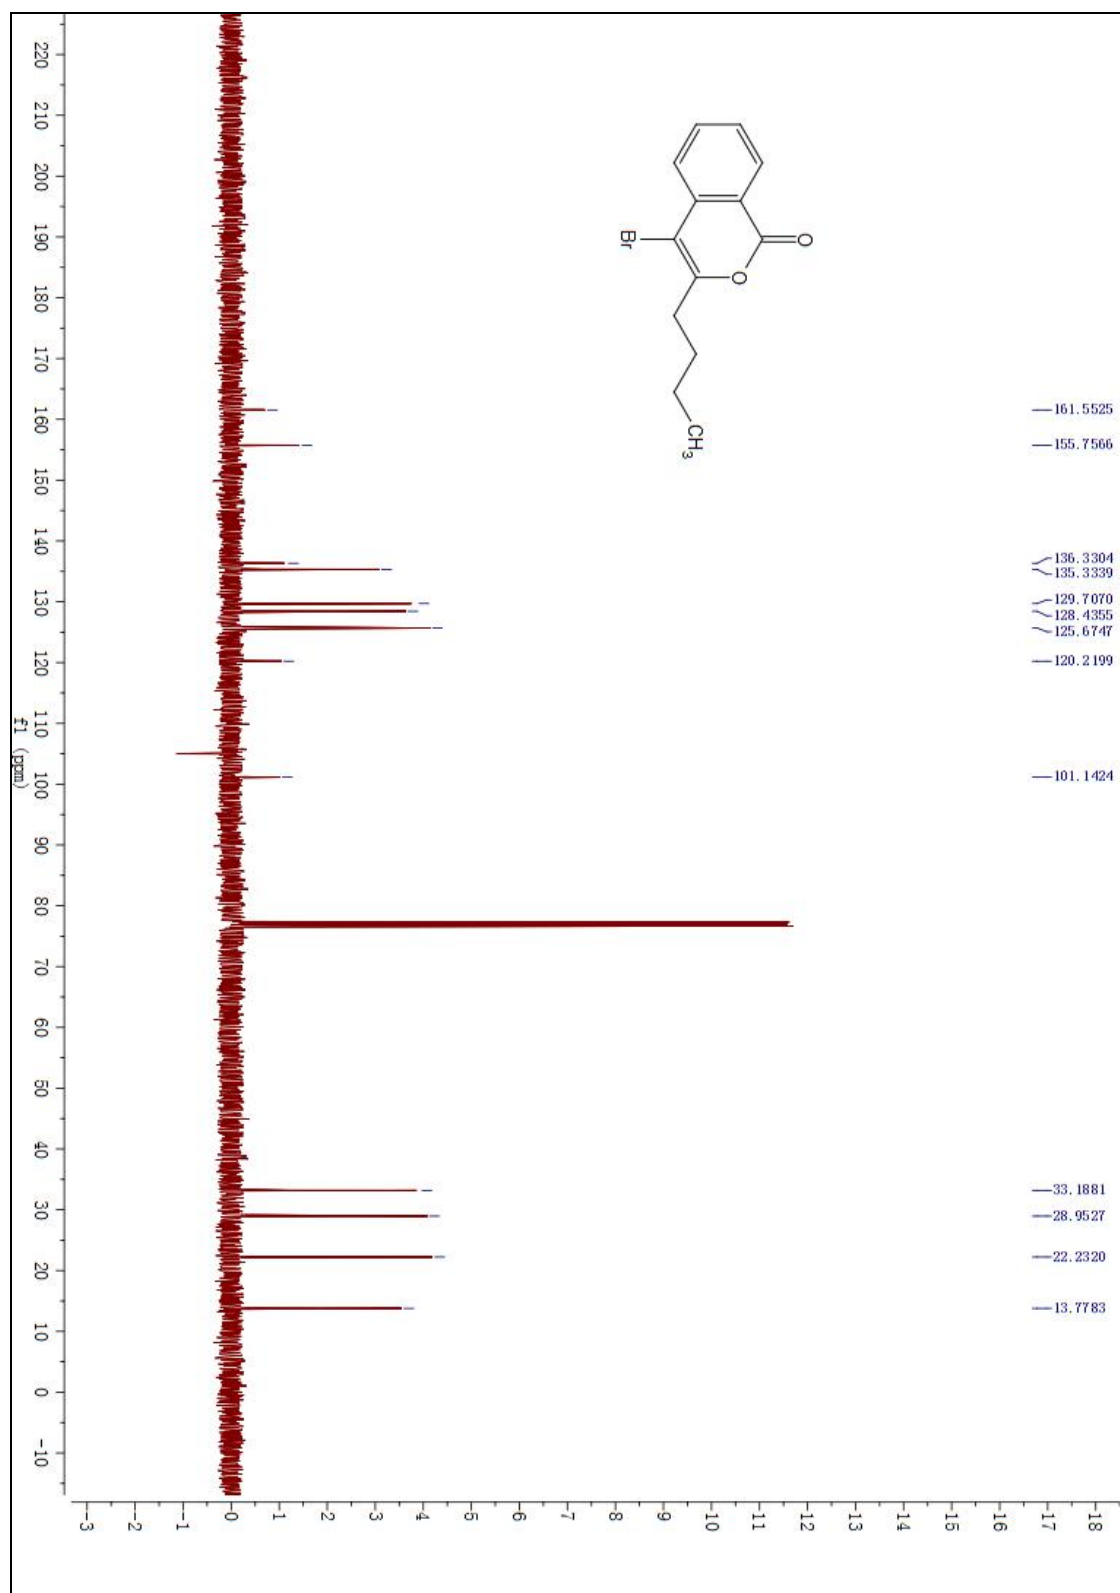

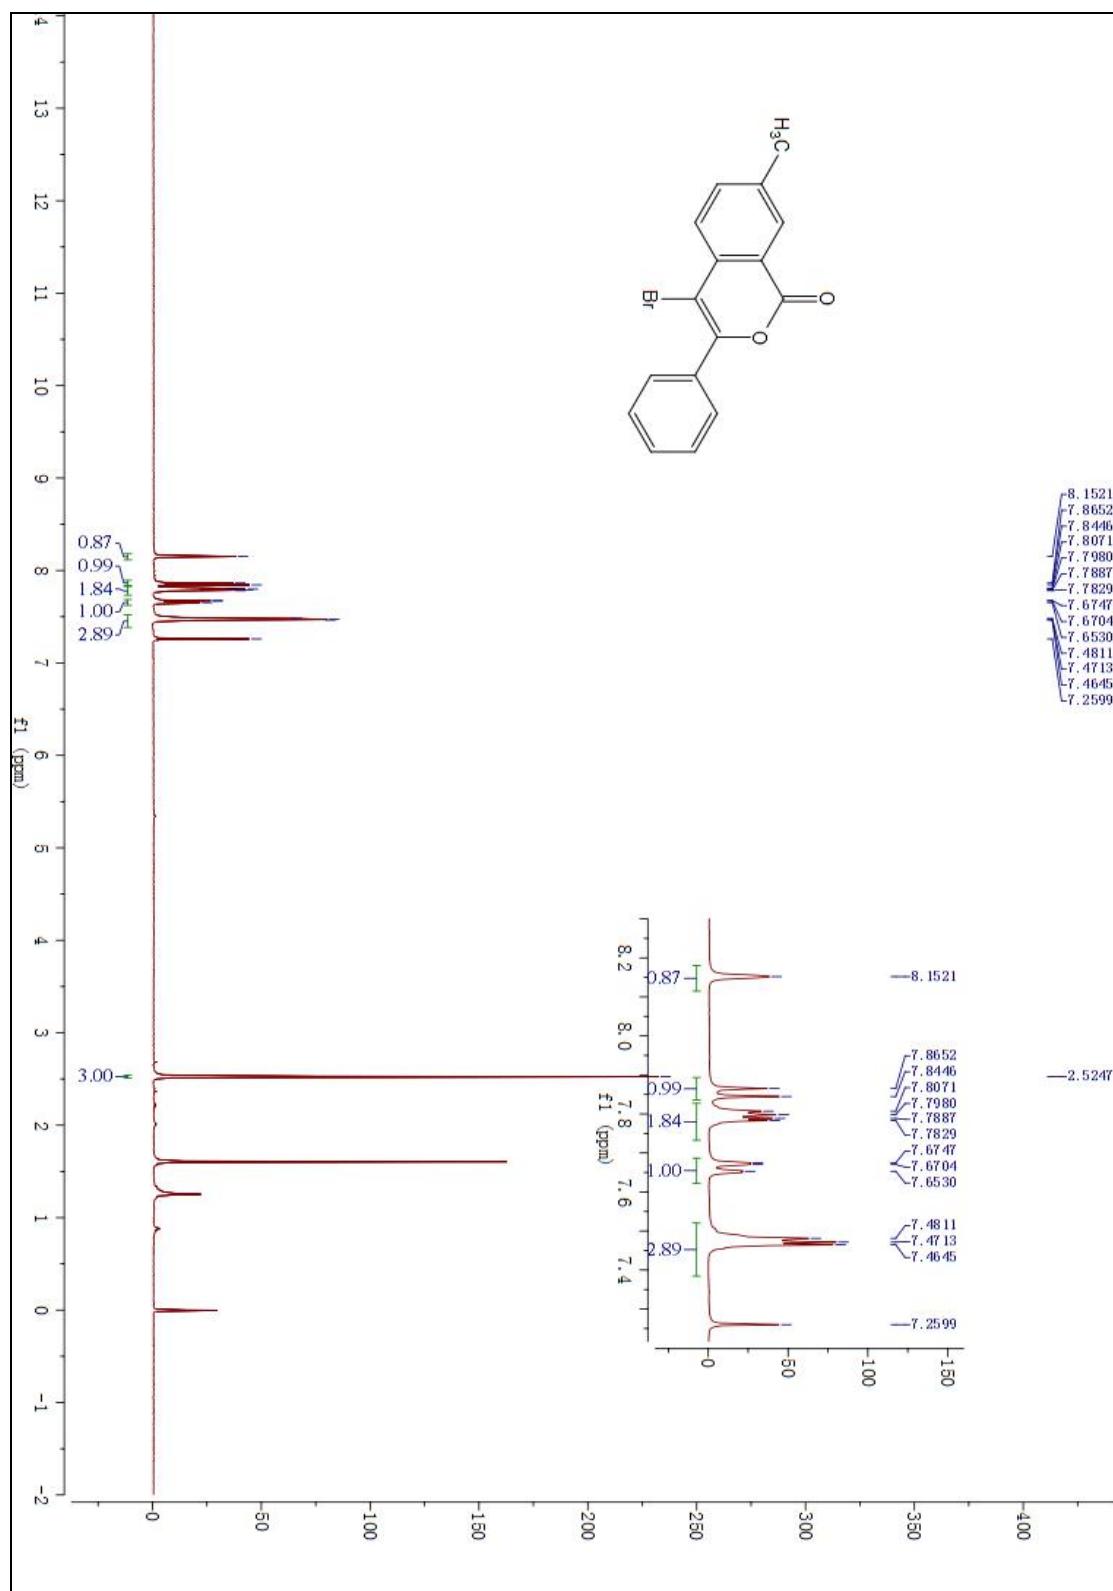

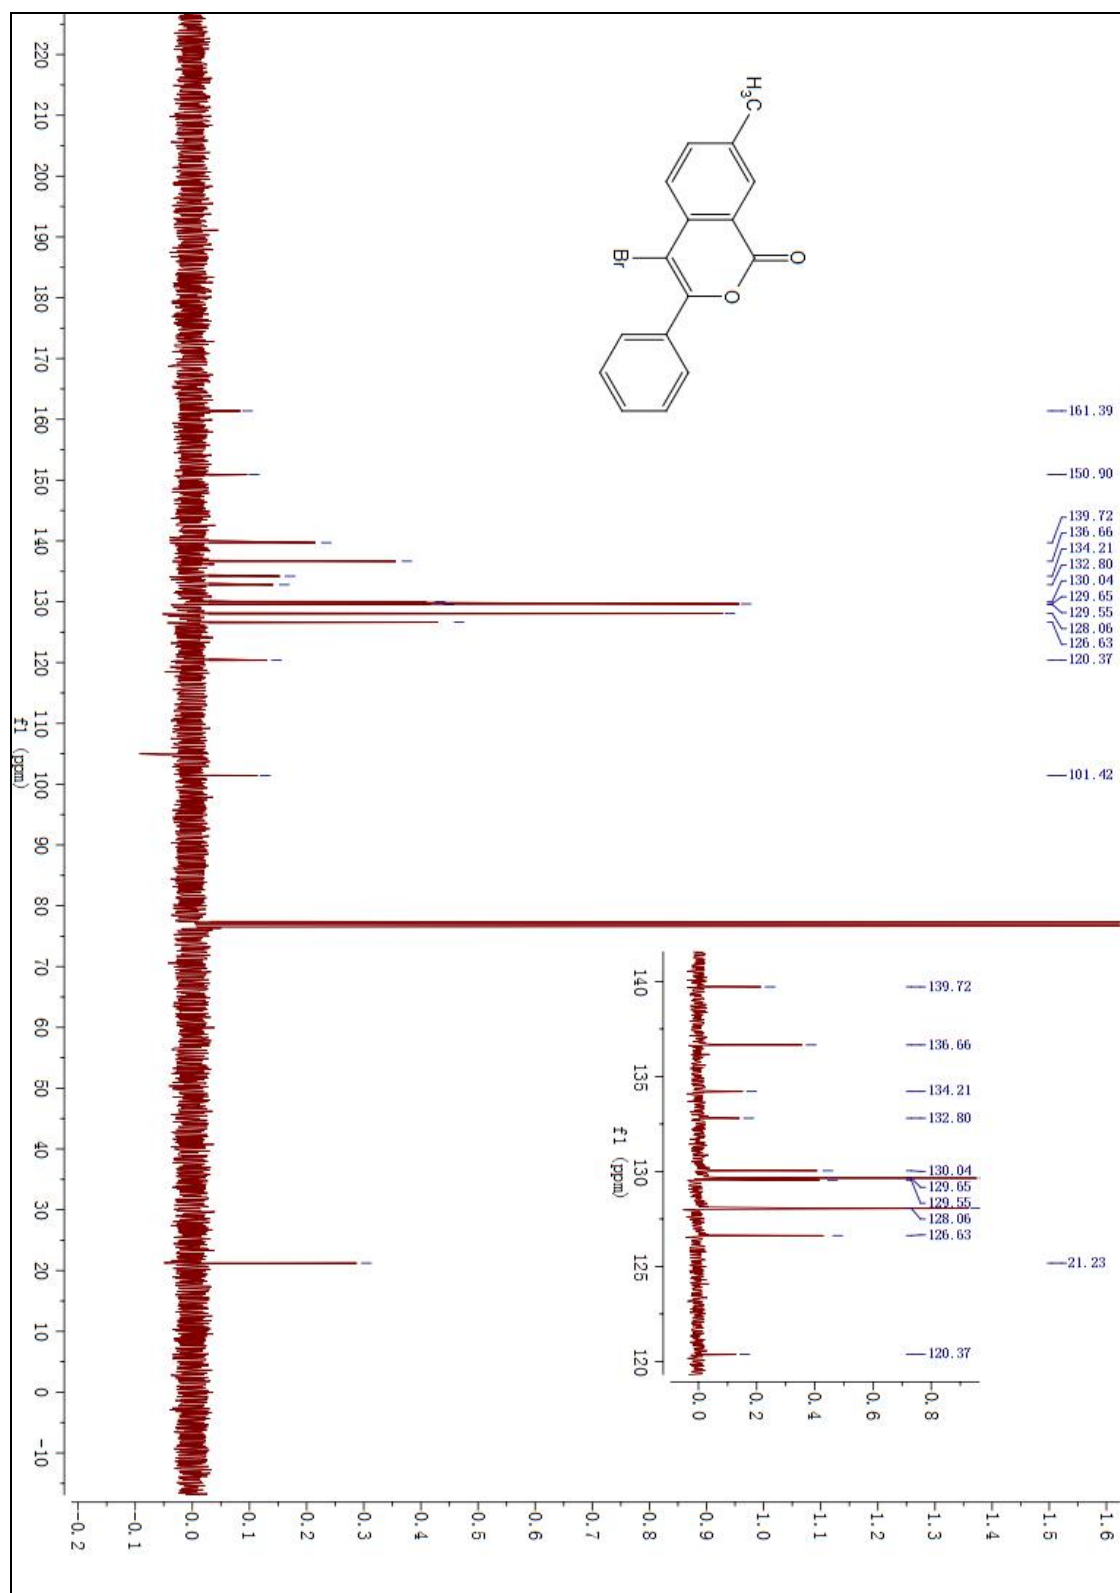

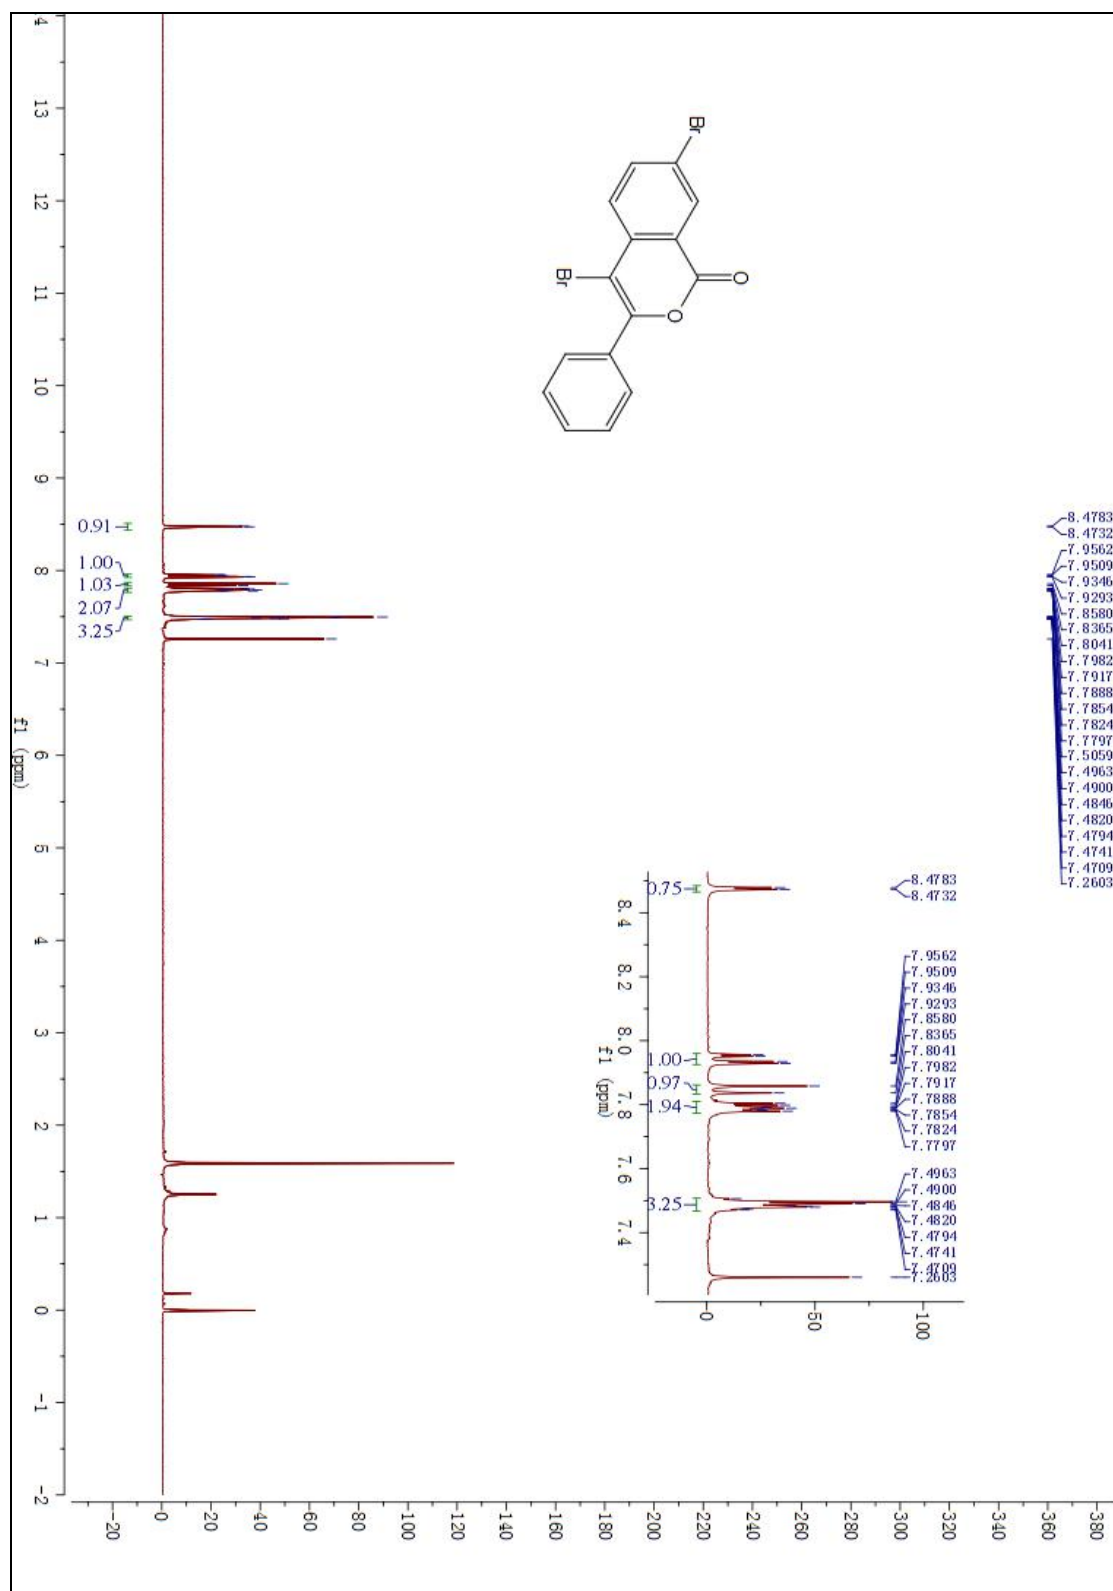

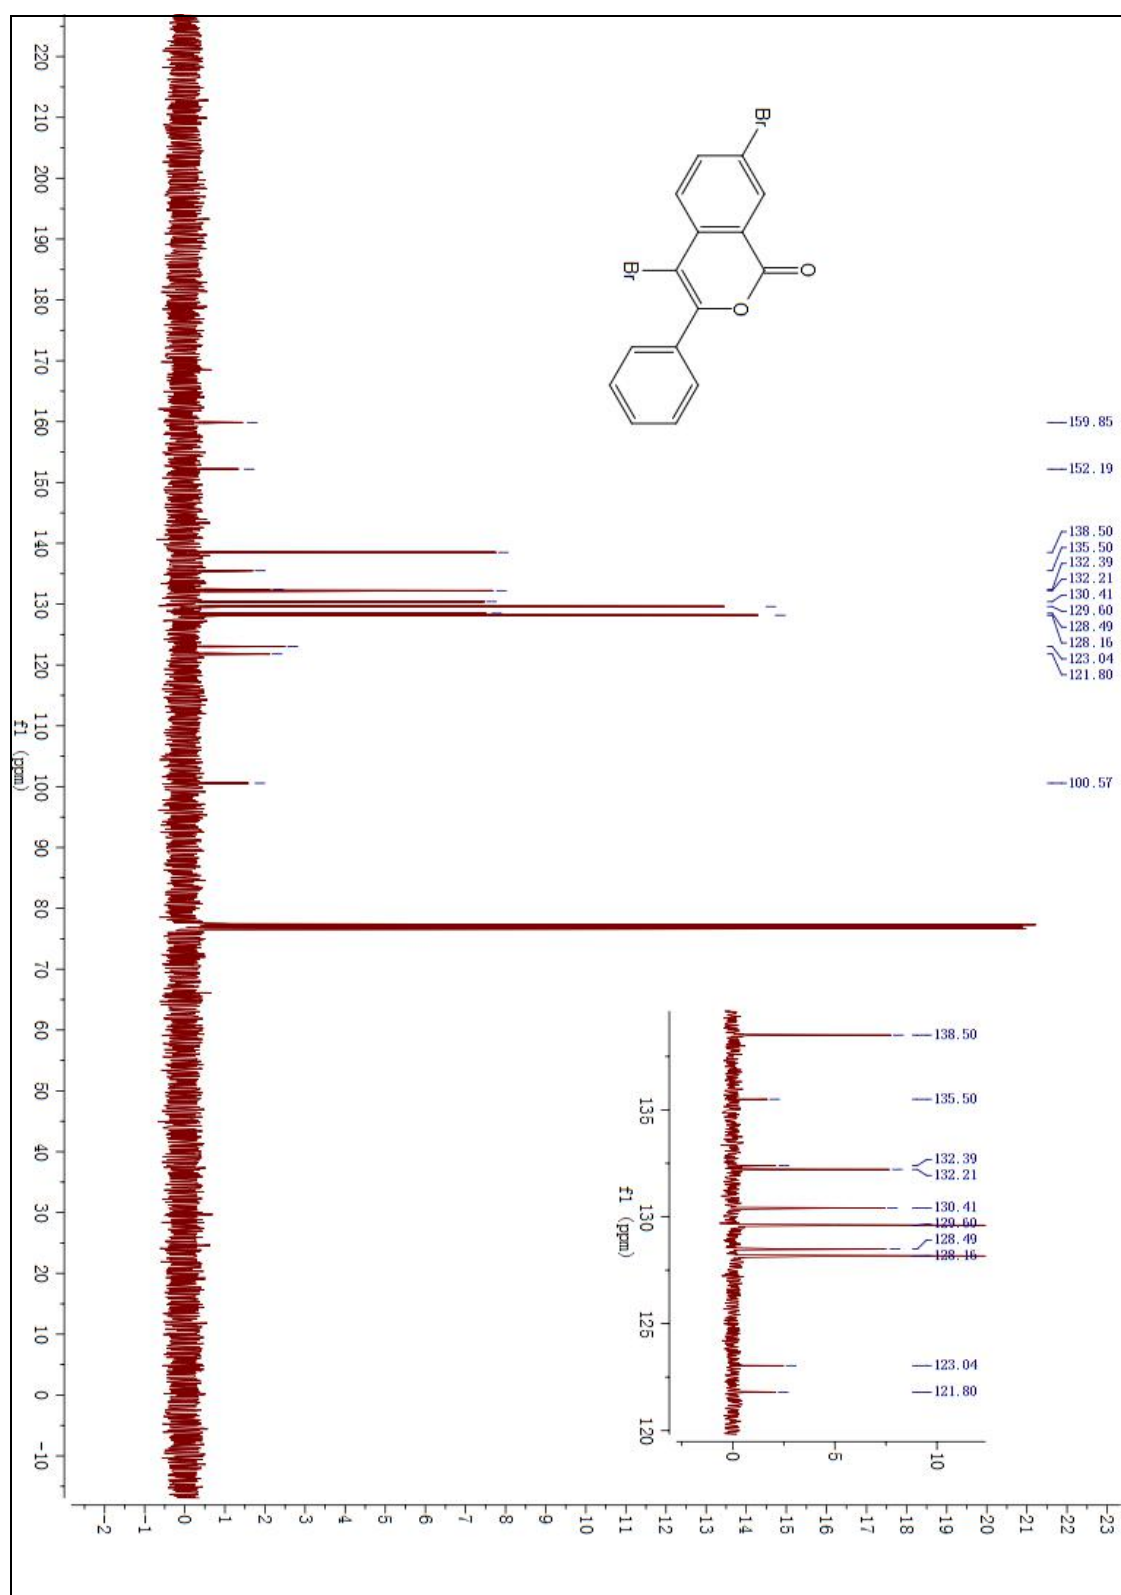

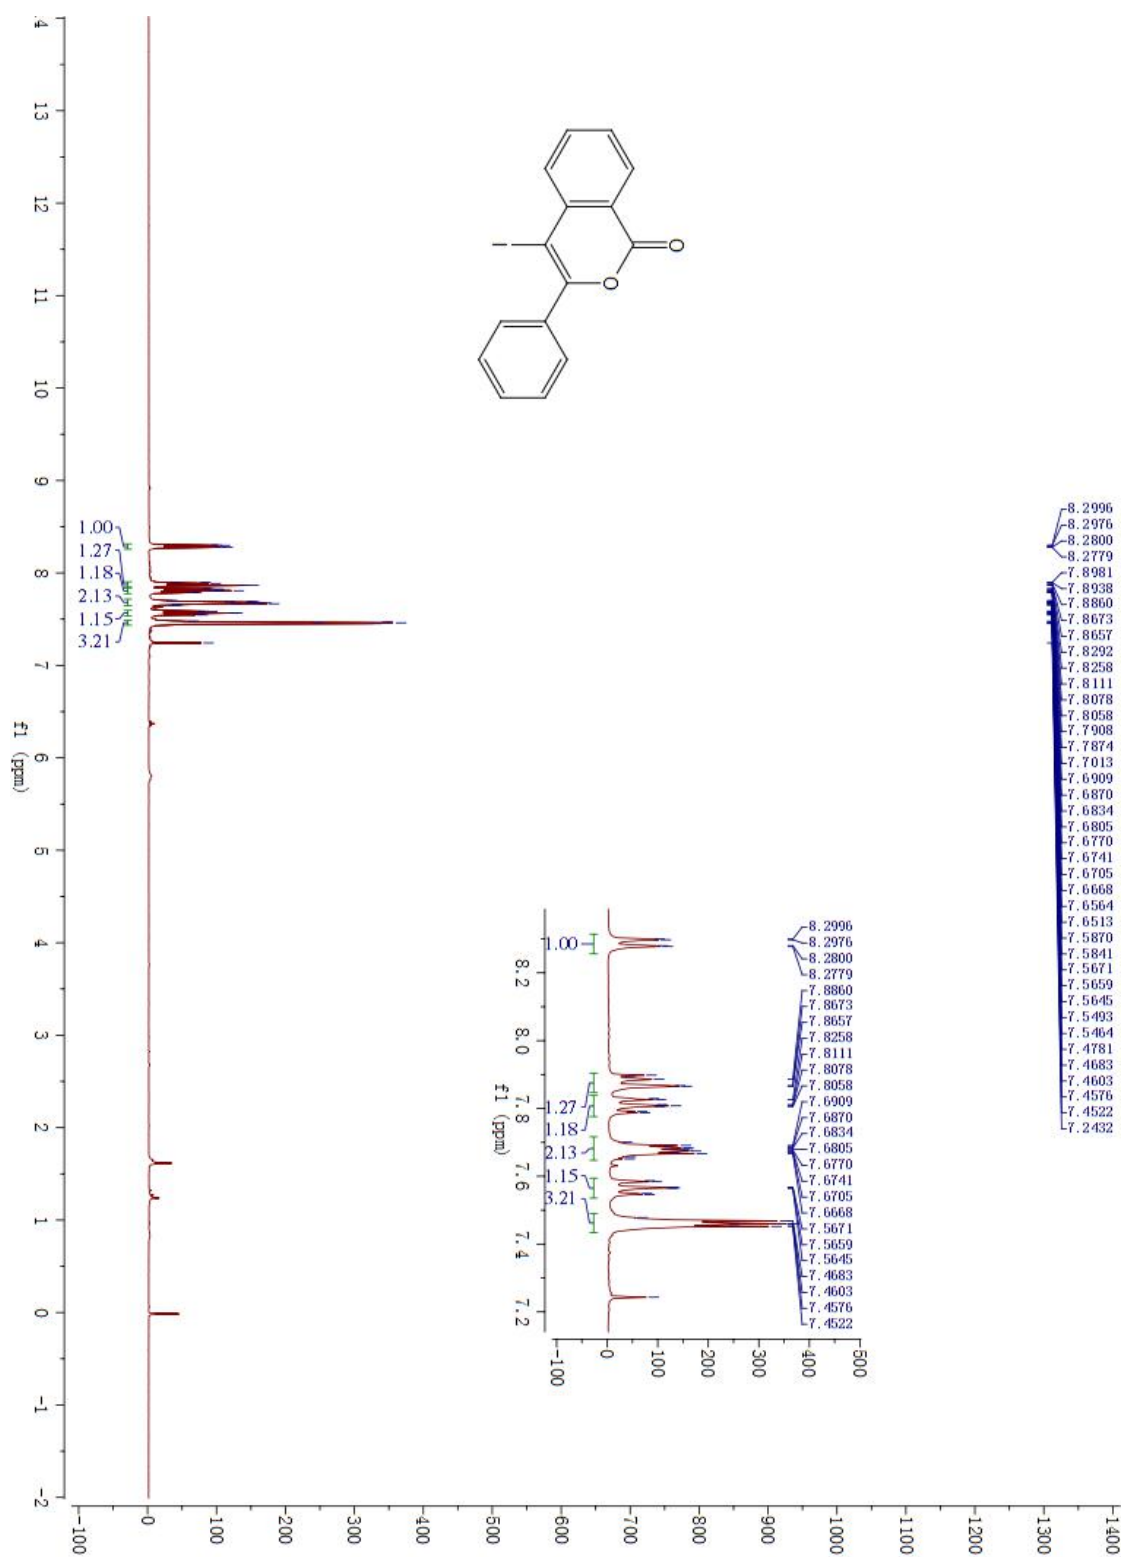



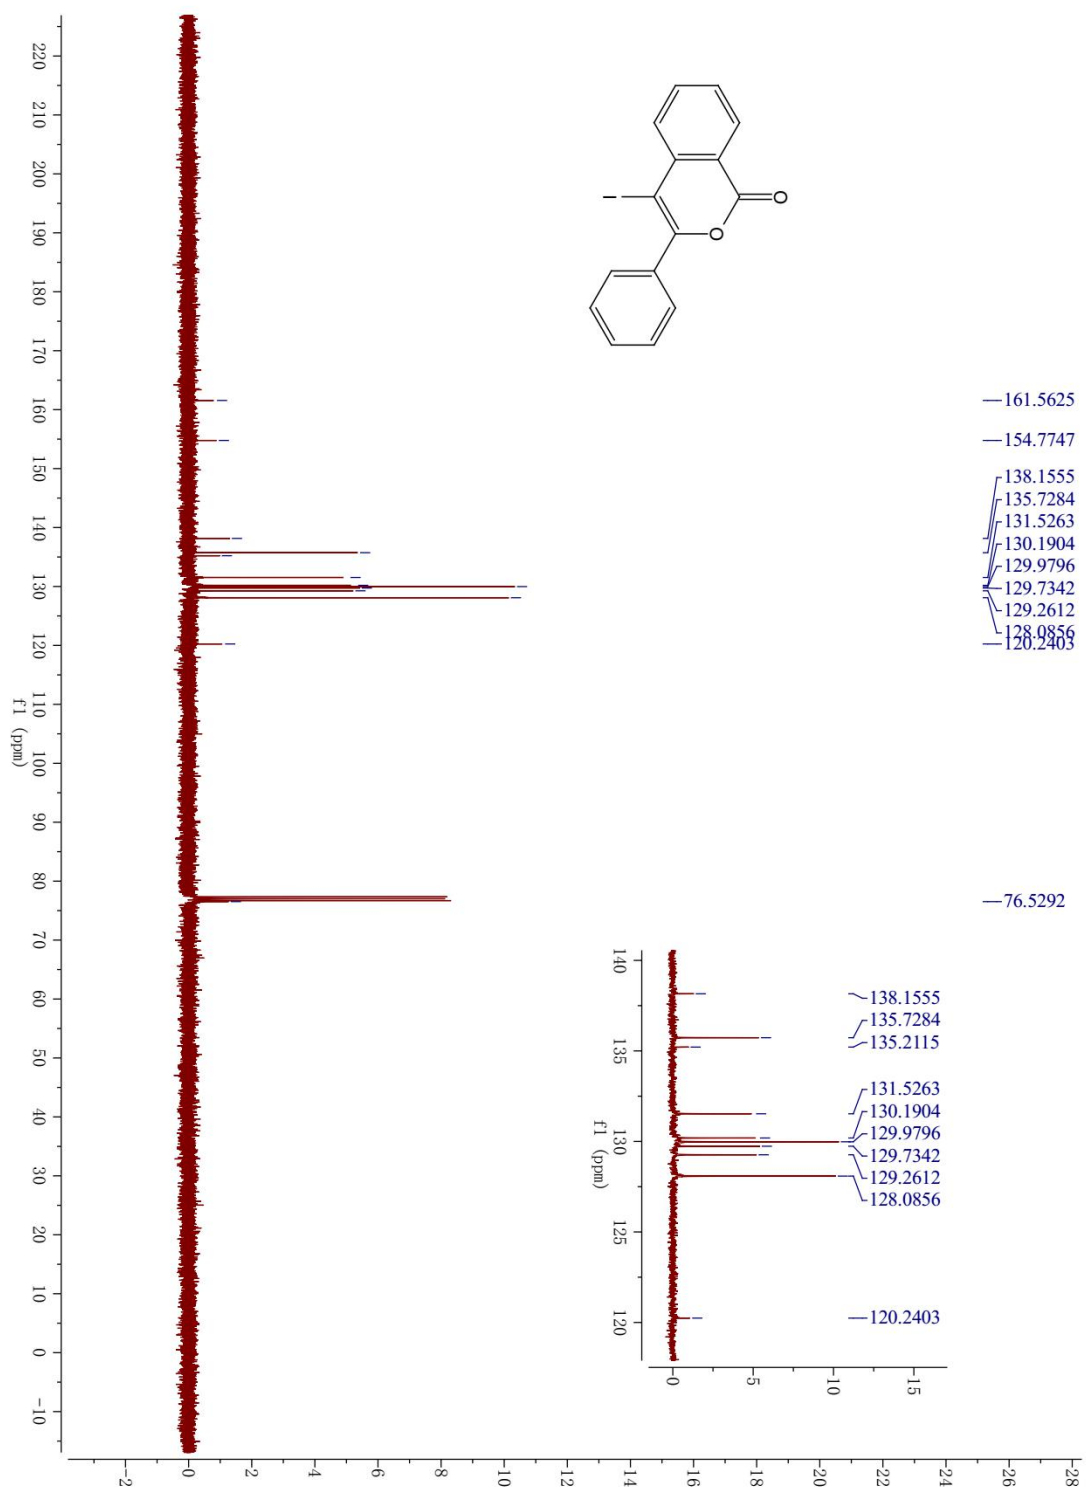

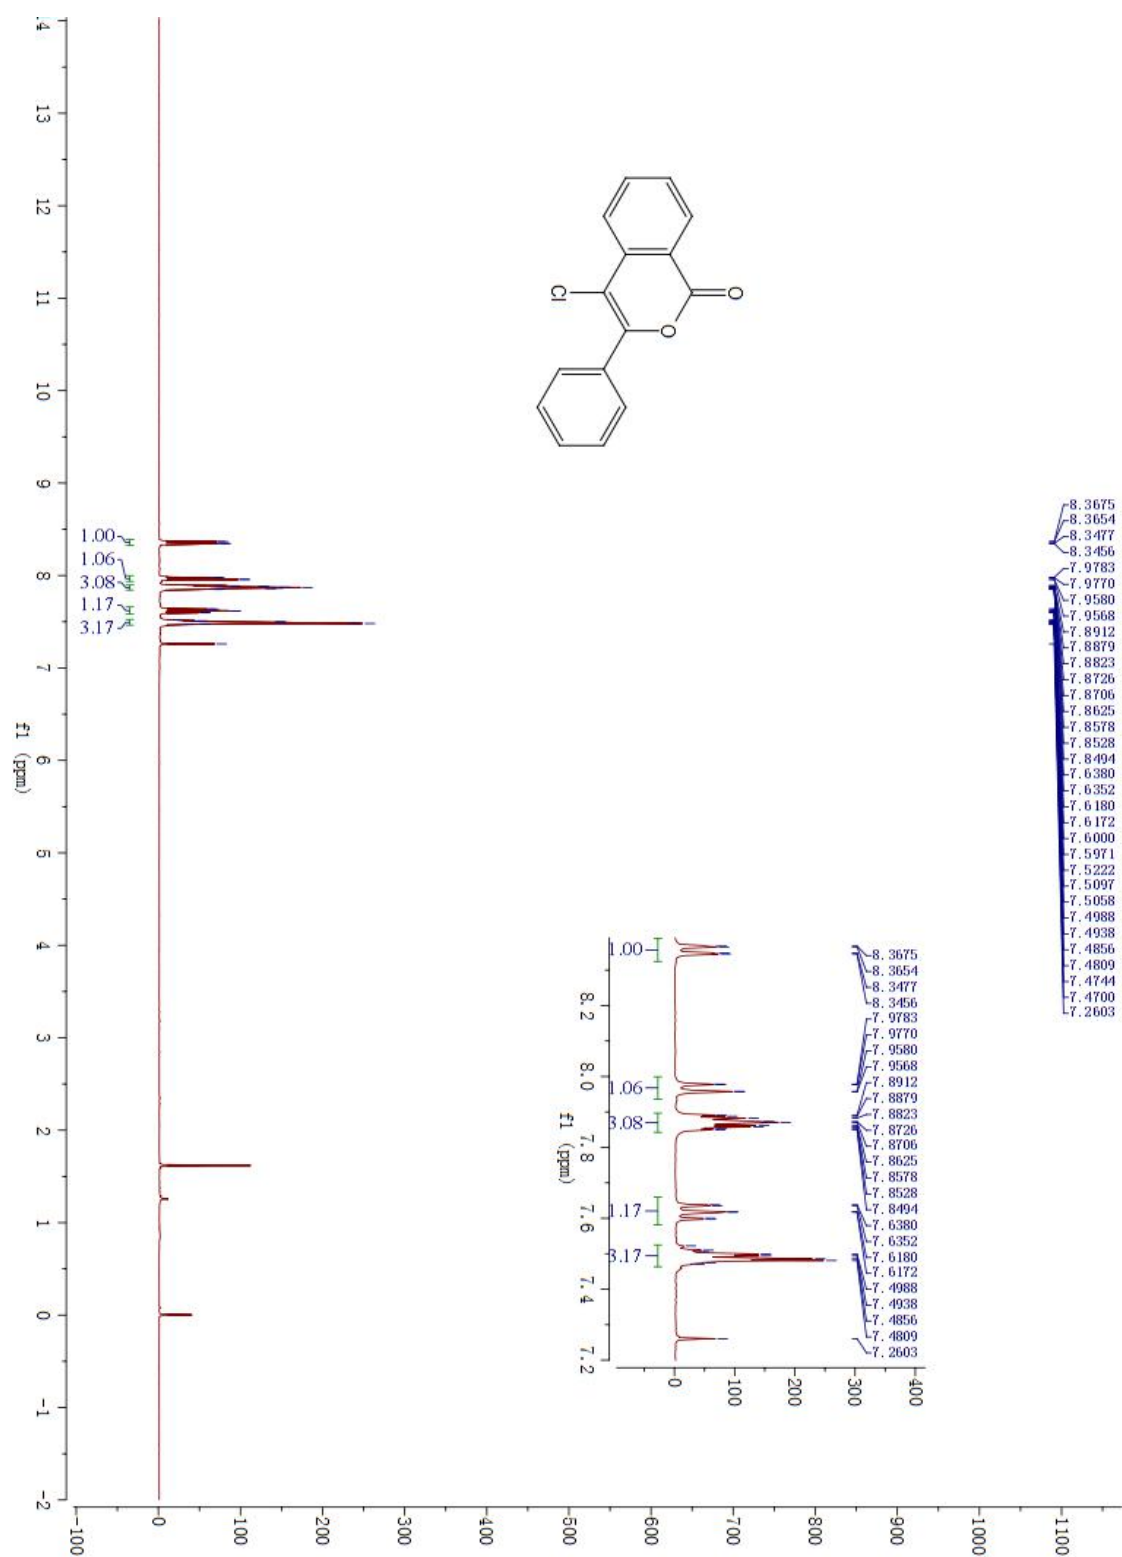

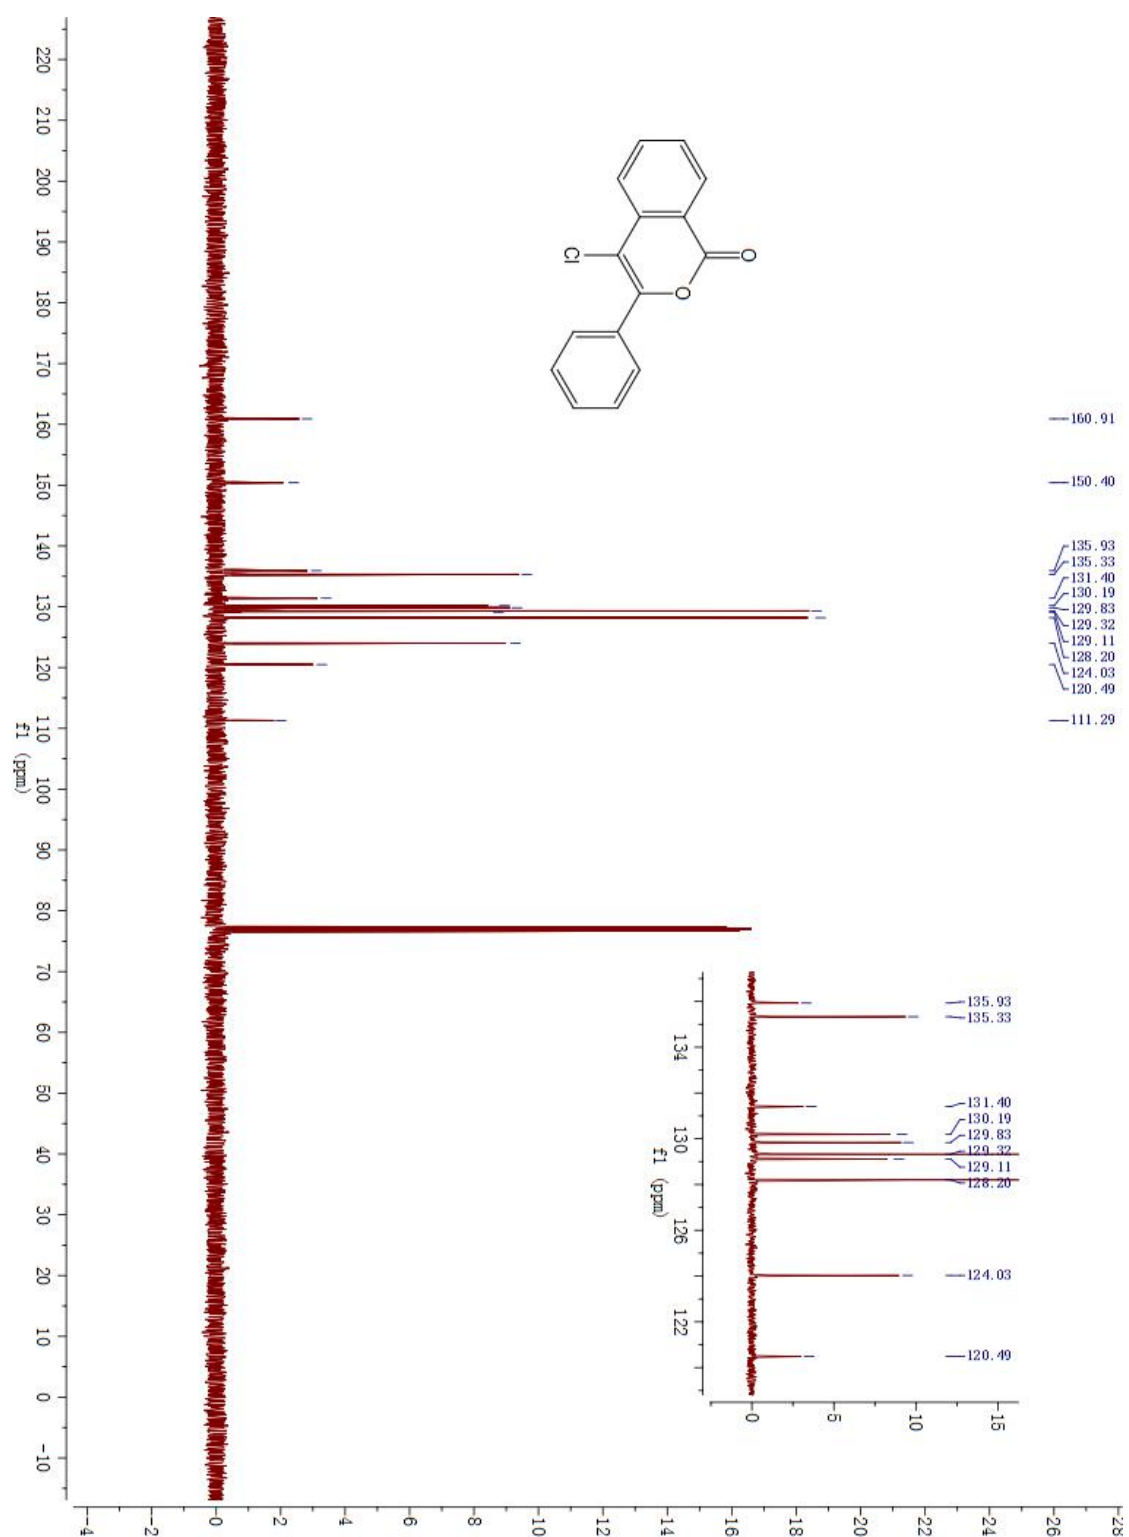

Supplement: c7ob00845g1.pdf [file c7ob00845g1.pdf]
